# Supplementary material
Source: Frontiers journal article supplement (https://www.frontiersin.org/articles/528477)
Supplement: Table_1.XLS [file Table_1.XLS]

## Sheet: Table S2
Table S2. The minimal reads required for achieving certain precision levels estimated with Type-II-PLE-based optimum sample size formula, illustrated with the subjects from 32-cohort HVMC study
D (Error Level)	1-D (Precision)	Average Species Population Size	#400	#401	#402	#403	#404	#405	#406	#407	#408	#410	#411	#412	#413	#414	#415	#416	#418	#420	#423	#424	#429	#430	#431	#432	#435	#436	#437	#439	#443	#444	#445	#446
0.01	0.99	1	91978.2	2.65168e+06	3.78112e+06	113918	9059.91	738608	191365	116583	4.34431e+06	13329.4	1.75982e+07	14133.9	5.88361e+07	610239	670062	1.16594e+06	1.81242e+06	3.25646e+06	1.137e+07	6.82639e+06	183273	622226	2041.24	6.68026e+06	18352.8	17193.5	1.20499e+06	3.31546e+07	1.35056e+06	1.14365e+06	70641.9	4.409e+06
		5	319116	2.16528e+06	2.78887e+06	258311	103450	1.05961e+06	530940	534743	1.853e+06	114410	5.04999e+06	75635.3	5.38889e+06	595134	954862	1.36579e+06	2.06909e+06	2.43743e+06	6.23338e+06	4.40723e+06	498608	542889	25609.3	4.21642e+06	128366	302063	1.9269e+06	7.29709e+06	1.54327e+06	1.08777e+06	183809	2.98393e+06
		10	545289	1.98431e+06	2.44622e+06	367510	295268	1.23778e+06	823976	1.03048e+06	1.28383e+06	288779	2.94976e+06	155760	1.92484e+06	588745	1.11222e+06	1.4621e+06	2.19055e+06	2.15152e+06	4.81173e+06	3.65028e+06	767285	511917	76119.7	3.45839e+06	296663	1.03795e+06	2.35865e+06	3.80212e+06	1.63453e+06	1.06455e+06	277478	2.52213e+06
		20	931764	1.81848e+06	2.14568e+06	522872	842758	1.44592e+06	1.27874e+06	1.98581e+06	889480	728899	1.72299e+06	320766	687528	582424	1.29551e+06	1.5652e+06	2.31914e+06	1.89916e+06	3.71432e+06	3.02334e+06	1.18074e+06	482712	226254	2.83663e+06	685610	3.56658e+06	2.88714e+06	1.98108e+06	1.73117e+06	1.04182e+06	418881	2.13179e+06
		30	1.27472e+06	1.72797e+06	1.98729e+06	642641	1.55649e+06	1.58354e+06	1.65361e+06	2.91469e+06	717647	1.2528e+06	1.25803e+06	489452	376488	578758	1.41642e+06	1.62884e+06	2.39782e+06	1.76549e+06	3.19239e+06	2.70779e+06	1.51935e+06	466406	427900	2.52612e+06	1.11917e+06	7.34239e+06	3.2496e+06	1.35296e+06	1.79034e+06	1.02875e+06	532989	1.9321e+06
		40	1.59215e+06	1.6665e+06	1.88205e+06	743912	2.40541e+06	1.68906e+06	1.9845e+06	3.82679e+06	616263	1.83979e+06	1.00642e+06	660573	245576	576170	1.509e+06	1.67557e+06	2.45527e+06	1.67639e+06	2.86719e+06	2.50408e+06	1.81699e+06	455172	672507	2.32666e+06	1.58449e+06	1.22555e+07	3.53404e+06	1.03223e+06	1.83354e+06	1.01958e+06	632343	1.80187e+06
		50	1.89187e+06	1.62033e+06	1.80428e+06	833330	3.3715e+06	1.77572e+06	2.28611e+06	4.72662e+06	547597	2.47866e+06	846462	833527	176299	574172	1.58495e+06	1.71273e+06	2.50077e+06	1.61039e+06	2.63794e+06	2.35669e+06	2.08745e+06	446645	954995	2.18285e+06	2.07497e+06	1.82351e+07	3.77171e+06	836818	1.86776e+06	1.01252e+06	721993	1.70693e+06
		60	2.17818e+06	1.58355e+06	1.74313e+06	914312	4.44255e+06	1.84982e+06	2.56627e+06	5.61679e+06	497211	3.16216e+06	734831	1.00796e+06	134477	572544	1.64984e+06	1.7437e+06	2.53858e+06	1.5584e+06	2.4643e+06	2.24272e+06	2.33806e+06	439797	1.27187e+06	2.07197e+06	2.58647e+06	2.52299e+07	3.97772e+06	704952	1.8962e+06	1.00679e+06	804600	1.63309e+06
		70	2.4538e+06	1.55311e+06	1.69304e+06	988892	5.60956e+06	1.91488e+06	2.82977e+06	6.49901e+06	458246	3.88515e+06	652016	1.18362e+06	106958	571171	1.70677e+06	1.77032e+06	2.57099e+06	1.51576e+06	2.32644e+06	2.15067e+06	2.57328e+06	434089	1.62053e+06	1.98264e+06	3.11614e+06	3.31997e+07	4.16065e+06	609810	1.92058e+06	1.00197e+06	881774	1.57315e+06
		80	2.72059e+06	1.52722e+06	1.65082e+06	1.05839e+06	6.86556e+06	1.97308e+06	3.07979e+06	7.37447e+06	426969	4.64378e+06	587861	1.36036e+06	87716.5	569984	1.75767e+06	1.79372e+06	2.59939e+06	1.47976e+06	2.21327e+06	2.074e+06	2.79608e+06	429204	1.99893e+06	1.90837e+06	3.66188e+06	4.21121e+07	4.3259e+06	537839	1.94195e+06	997816	954584	1.52301e+06
		90	2.9799e+06	1.50474e+06	1.61445e+06	1.12374e+06	8.20492e+06	2.02589e+06	3.31859e+06	8.24408e+06	401158	5.43499e+06	536533	1.53803e+06	73638.9	568940	1.80383e+06	1.8146e+06	2.62471e+06	1.44872e+06	2.11803e+06	2.00864e+06	3.00857e+06	424941	2.40541e+06	1.84517e+06	4.22207e+06	5.19398e+07	4.4771e+06	481440	1.961e+06	994164	1.02378e+06	1.48011e+06
		100	3.23273e+06	1.48491e+06	1.5826e+06	1.18561e+06	9.62298e+06	2.07432e+06	3.54786e+06	9.1085e+06	379394	6.25632e+06	494428	1.71653e+06	62971.8	568007	1.84614e+06	1.8335e+06	2.64757e+06	1.4215e+06	2.0363e+06	1.95192e+06	3.21228e+06	421164	2.83858e+06	1.79041e+06	4.79541e+06	6.26593e+07	4.61682e+06	436020	1.9782e+06	990908	1.08992e+06	1.44276e+06
0.05	0.95	1	3679.13	106067	151245	4556.74	362.396	29544.3	7654.59	4663.33	173772	533.177	703930	565.355	2.35344e+06	24409.6	26802.5	46637.4	72496.8	130258	454799	273056	7330.94	24889	81.6495	267210	734.11	687.742	48199.7	1.32619e+06	54022.4	45746.1	2825.68	176360
		5	12764.6	86611.1	111555	10332.4	4138	42384.3	21237.6	21389.7	74120.1	4576.39	201999	3025.41	215556	23805.4	38194.5	54631.8	82763.7	97497	249335	176289	19944.3	21715.6	1024.37	168657	5134.64	12082.5	77076.1	291884	61731	43510.6	7352.36	119357
		10	21811.6	79372.6	97848.9	14700.4	11810.7	49511.4	32959	41219.4	51353	11551.1	117990	6230.41	76993.6	23549.8	44488.7	58484	87622	86061	192469	146011	30691.4	20476.7	3044.79	138335	11866.5	41517.9	94346	152085	65381.1	42581.8	11099.1	100885
		20	37270.6	72739	85827	20914.9	33710.3	57836.9	51149.7	79432.4	35579.2	29155.9	68919.6	12830.6	27501.1	23296.9	51820.2	62607.9	92765.4	75966.3	148573	120934	47229.6	19308.5	9050.18	113465	27424.4	142663	115486	79243	69246.9	41672.8	16755.2	85271.8
		30	50988.7	69118.7	79491.5	25705.6	62259.5	63341.8	66144.6	116587	28705.9	50112	50321.3	19578.1	15059.5	23150.3	56656.9	65153.8	95913	70619.5	127696	108311	60774	18656.2	17116	101045	44766.6	293696	129984	54118.3	71613.5	41150.1	21319.6	77284.2
		40	63686.1	66659.9	75282.2	29756.5	96216.5	67562.5	79380.1	153072	24650.5	73591.8	40256.7	26422.9	9823.04	23046.8	60359.9	67022.6	98210.8	67055.7	114688	100163	72679.5	18206.9	26900.3	93066.3	63379.8	490219	141362	41289.2	73341.4	40783.2	25293.7	72074.9
		50	75674.7	64813	72171.2	33333.2	134860	71029	91444.6	189065	21903.9	99146.4	33858.5	33341.1	7051.97	22966.9	63398.1	68509	100031	64415.8	105518	94267.4	83498.1	17865.8	38199.8	87314	82998.9	729404	150869	33472.7	74710.4	40500.9	28879.7	68277.3
		60	87127	63342.1	69725.1	36572.5	177702	73993	102651	224672	19888.4	126486	29393.3	40318.3	5379.06	22901.8	65993.6	69748	101543	62336.1	98572.1	89708.8	93522.4	17591.9	50874.8	82879	103459	1.00919e+06	159109	28198.1	75847.9	40271.7	32184	65323.4
		70	98152	62124.6	67721.7	39555.7	224382	76595.3	113191	259960	18329.8	155406	26080.6	47344.9	4278.33	22846.8	68270.8	70812.9	102839	60630.3	93057.6	86027	102931	17363.6	64821.1	79305.4	124646	1.32799e+06	166426	24392.4	76823.1	40078.9	35271	62925.9
		80	108824	61088.8	66032.9	42335.8	274622	78923.4	123191	294979	17078.8	185751	23514.5	54414.2	3508.66	22799.4	70306.9	71748.6	103976	59190.3	88530.8	82960	111843	17168.2	79957	76334.7	146475	1.68448e+06	173036	21513.6	77678	39912.6	38183.4	60920.3
		90	119196	60189.5	64578.2	44949.8	328197	81035.6	132744	329763	16046.3	217399	21461.3	61521	2945.55	22757.6	72153.1	72584.2	104988	57948.7	84721	80345.6	120343	16997.7	96216.2	73806.8	168883	2.07759e+06	179084	19257.6	78440	39766.6	40951.3	59204.4
		100	129309	59396.3	63304.1	47424.6	384919	82972.8	141914	364340	15175.8	250253	19777.1	68661.3	2518.87	22720.3	73845.7	73339.8	105903	56860	81452.2	78076.9	128491	16846.6	113543	71616.5	191817	2.50637e+06	184673	17440.8	79127.9	39636.3	43596.8	57710.4
0.1	0.9	1	919.782	26516.8	37811.2	1139.18	90.5991	7386.08	1913.65	1165.83	43443.1	133.294	175982	141.339	588361	6102.39	6700.62	11659.4	18124.2	32564.6	113700	68263.9	1832.73	6222.26	20.4124	66802.6	183.528	171.935	12049.9	331546	13505.6	11436.5	706.419	44090
		5	3191.16	21652.8	27888.7	2583.11	1034.5	10596.1	5309.4	5347.43	18530	1144.1	50499.9	756.353	53888.9	5951.34	9548.62	13657.9	20690.9	24374.3	62333.8	44072.3	4986.08	5428.89	256.093	42164.2	1283.66	3020.63	19269	72970.9	15432.7	10877.7	1838.09	29839.3
		10	5452.89	19843.1	24462.2	3675.1	2952.68	12377.8	8239.76	10304.8	12838.3	2887.79	29497.6	1557.6	19248.4	5887.45	11122.2	14621	21905.5	21515.2	48117.3	36502.8	7672.85	5119.17	761.197	34583.9	2966.63	10379.5	23586.5	38021.2	16345.3	10645.5	2774.78	25221.3
		20	9317.64	18184.8	21456.8	5228.72	8427.58	14459.2	12787.4	19858.1	8894.8	7288.99	17229.9	3207.66	6875.28	5824.24	12955.1	15652	23191.4	18991.6	37143.2	30233.4	11807.4	4827.12	2262.54	28366.3	6856.1	35665.8	28871.4	19810.8	17311.7	10418.2	4188.81	21317.9
		30	12747.2	17279.7	19872.9	6426.41	15564.9	15835.4	16536.1	29146.9	7176.47	12528	12580.3	4894.52	3764.88	5787.58	14164.2	16288.4	23978.2	17654.9	31923.9	27077.9	15193.5	4664.06	4279	25261.2	11191.7	73423.9	32496	13529.6	17903.4	10287.5	5329.89	19321
		40	15921.5	16665	18820.5	7439.12	24054.1	16890.6	19845	38267.9	6162.63	18397.9	10064.2	6605.73	2455.76	5761.7	15090	16755.7	24552.7	16763.9	28671.9	25040.8	18169.9	4551.72	6725.07	23266.6	15844.9	122555	35340.4	10322.3	18335.4	10195.8	6323.43	18018.7
		50	18918.7	16203.3	18042.8	8333.3	33715	17757.2	22861.1	47266.2	5475.97	24786.6	8464.62	8335.27	1762.99	5741.72	15849.5	17127.3	25007.7	16103.9	26379.4	23566.9	20874.5	4466.45	9549.95	21828.5	20749.7	182351	37717.1	8368.18	18677.6	10125.2	7219.93	17069.3
		60	21781.8	15835.5	17431.3	9143.12	44425.5	18498.2	25662.7	56167.9	4972.11	31621.6	7348.31	10079.6	1344.77	5725.44	16498.4	17437	25385.8	15584	24643	22427.2	23380.6	4397.97	12718.7	20719.7	25864.7	252299	39777.2	7049.52	18962	10067.9	8046	16330.9
		70	24538	15531.1	16930.4	9888.92	56095.6	19148.8	28297.7	64990.1	4582.46	38851.5	6520.16	11836.2	1069.58	5711.71	17067.7	17703.2	25709.9	15157.6	23264.4	21506.7	25732.8	4340.89	16205.3	19826.4	31161.4	331997	41606.5	6098.1	19205.8	10019.7	8817.74	15731.5
		80	27205.9	15272.2	16508.2	10583.9	68655.6	19730.8	30797.9	73744.7	4269.69	46437.8	5878.61	13603.6	877.165	5699.84	17576.7	17937.2	25993.9	14797.6	22132.7	20740	27960.8	4292.04	19989.3	19083.7	36618.8	421121	43259	5378.39	19419.5	9978.16	9545.84	15230.1
		90	29799	15047.4	16144.5	11237.4	82049.2	20258.9	33185.9	82440.8	4011.58	54349.9	5365.33	15380.3	736.389	5689.4	18038.3	18146	26247.1	14487.2	21180.3	20086.4	30085.7	4249.41	24054.1	18451.7	42220.7	519398	44771	4814.4	19610	9941.64	10237.8	14801.1
		100	32327.3	14849.1	15826	11856.1	96229.8	20743.2	35478.6	91085	3793.94	62563.2	4944.28	17165.3	629.718	5680.07	18461.4	18335	26475.7	14215	20363	19519.2	32122.8	4211.64	28385.8	17904.1	47954.1	626593	46168.2	4360.2	19782	9909.08	10899.2	14427.6
0.15	0.85	1	408.792	11785.3	16805	506.304	40.2663	3282.7	850.51	518.147	19308.1	59.2418	78214.4	62.8172	261494	2712.17	2978.05	5181.94	8055.2	14473.1	50533.2	30339.5	814.548	2765.45	9.07216	29690	81.5678	76.4157	5355.52	147354	6002.49	5082.91	313.964	19595.5
		5	1418.29	9623.45	12395	1148.05	459.778	4709.36	2359.73	2376.63	8235.56	508.488	22444.4	336.157	23950.6	2645.04	4243.83	6070.2	9195.97	10833	27703.9	19587.7	2216.03	2412.84	113.819	18739.6	570.516	1342.5	8564.01	32431.5	6859	4834.51	816.929	13261.9
		10	2423.51	8819.17	10872.1	1633.38	1312.3	5501.26	3662.11	4579.93	5705.89	1283.46	13110	692.267	8554.85	2616.64	4943.19	6498.23	9735.78	9562.33	21385.5	16223.5	3410.16	2275.19	338.31	15370.6	1318.5	4613.1	10482.9	16898.3	7264.56	4731.31	1233.24	11209.5
		20	4141.17	8082.11	9536.34	2323.87	3745.59	6426.33	5683.3	8825.83	3953.24	3239.55	7657.73	1425.63	3055.68	2588.55	5757.8	6956.44	10307.3	8440.7	16508.1	13437.1	5247.74	2145.38	1005.58	12607.2	3047.16	15851.5	12831.7	8804.78	7694.1	4630.31	1861.69	9474.64
		30	5665.41	7679.86	8832.39	2856.18	6917.72	7037.98	7349.4	12954.2	3189.54	5568	5591.25	2175.34	1673.28	2572.26	6295.21	7239.31	10657	7846.62	14188.4	12034.6	6752.67	2072.92	1901.78	11227.2	4974.07	32632.9	14442.7	6013.14	7957.05	4572.23	2368.84	8587.13
		40	7076.23	7406.65	8364.68	3306.27	10690.7	7506.94	8820.02	17007.9	2738.95	8176.86	4472.97	2935.88	1091.45	2560.76	6706.66	7446.96	10912.3	7450.64	12743.1	11129.2	8075.5	2022.99	2988.92	10340.7	7042.2	54468.7	15706.9	4587.69	8149.05	4531.47	2810.41	8008.32
		50	8408.3	7201.45	8019.02	3703.69	14984.4	7892.11	10160.5	21007.2	2433.76	11016.3	3762.05	3704.56	783.552	2551.87	7044.23	7612.12	11114.5	7157.31	11724.2	10474.2	9277.56	1985.09	4244.42	9701.55	9222.11	81044.9	16763.2	3719.19	8301.15	4500.1	3208.86	7586.36
		60	9680.78	7038.01	7747.23	4063.61	19744.6	8221.44	11405.7	24963.5	2209.83	14054	3265.92	4479.81	597.673	2544.64	7332.62	7749.78	11282.6	6926.24	10952.5	9967.65	10391.4	1954.65	5652.75	9208.77	11495.4	112133	17678.8	3133.12	8427.54	4474.63	3576	7258.16
		70	10905.8	6902.73	7524.63	4395.07	24931.4	8510.59	12576.7	28884.5	2036.65	17267.4	2897.85	5260.55	475.37	2538.54	7585.65	7868.11	11426.6	6736.69	10339.7	9558.55	11436.8	1929.28	7202.34	8811.71	13849.5	147554	18491.8	2710.27	8535.9	4453.21	3919	6991.77
		80	12091.5	6787.64	7336.98	4703.98	30513.6	8769.27	13687.9	32775.4	1897.64	20639	2612.72	6046.03	389.851	2533.26	7811.87	7972.07	11552.9	6576.71	9836.76	9217.78	12427	1907.57	8884.12	8481.63	16275	187165	19226.2	2390.4	8630.89	4434.74	4242.6	6768.92
		90	13244	6687.72	7175.36	4994.42	36466.3	9003.95	14749.3	36640.3	1782.92	24155.5	2384.59	6835.67	327.284	2528.62	8017.01	8064.91	11665.4	6438.74	9413.45	8927.29	13371.4	1888.63	10690.7	8200.75	18764.8	230843	19898.2	2139.73	8715.55	4418.51	4550.14	6578.27
		100	14367.7	6599.59	7033.79	5269.4	42768.8	9219.2	15768.3	40482.2	1686.2	27805.9	2197.46	7629.03	279.875	2524.48	8205.08	8148.87	11767	6317.78	9050.24	8675.21	14276.8	1871.84	12615.9	7957.39	21313	278486	20519.2	1937.87	8791.99	4404.04	4844.09	6412.27
0.2	0.8	1	229.945	6629.2	9452.79	284.796	22.6498	1846.52	478.412	291.458	10860.8	33.3235	43995.6	35.3347	147090	1525.6	1675.15	2914.84	4531.05	8141.14	28424.9	17066	458.183	1555.56	5.10309	16700.6	45.8819	42.9838	3012.48	82886.6	3376.4	2859.13	176.605	11022.5
		5	797.789	5413.19	6972.17	645.777	258.625	2649.02	1327.35	1336.86	4632.5	286.024	12625	189.088	13472.2	1487.84	2387.16	3414.49	5172.73	6093.57	15583.4	11018.1	1246.52	1357.22	64.0232	10541	320.915	755.158	4817.25	18242.7	3858.19	2719.41	459.523	7459.83
		10	1363.22	4960.79	6115.56	918.774	738.171	3094.46	2059.94	2576.21	3209.56	721.947	7374.39	389.4	4812.1	1471.86	2780.55	3655.25	5476.37	5378.81	12029.3	9125.71	1918.21	1279.79	190.299	8645.96	741.658	2594.87	5896.63	9505.29	4086.32	2661.36	693.695	6305.32
		20	2329.41	4546.19	5364.19	1307.18	2106.9	3614.81	3196.86	4964.53	2223.7	1822.25	4307.47	801.915	1718.82	1456.06	3238.76	3913	5797.84	4747.9	9285.79	7558.36	2951.85	1206.78	565.636	7091.58	1714.03	8916.46	7217.85	4952.69	4327.93	2604.55	1047.2	5329.49
		30	3186.8	4319.92	4968.22	1606.6	3891.22	3958.86	4134.04	7286.71	1794.12	3132	3145.08	1223.63	941.22	1446.89	3541.05	4072.11	5994.56	4413.72	7980.98	6769.47	3798.38	1166.02	1069.75	6315.31	2797.92	18356	8124	3382.39	4475.84	2571.88	1332.47	4830.26
		40	3980.38	4166.24	4705.13	1859.78	6013.53	4222.65	4961.26	9566.97	1540.66	4599.48	2516.05	1651.43	613.94	1440.43	3772.49	4188.91	6138.17	4190.98	7167.98	6260.2	4542.47	1137.93	1681.27	5816.64	3961.24	30638.7	8835.11	2580.58	4583.84	2548.95	1580.86	4504.68
		50	4729.67	4050.82	4510.7	2083.33	8428.75	4439.31	5715.29	11816.5	1368.99	6196.65	2116.15	2083.82	440.748	1435.43	3962.38	4281.82	6251.93	4025.99	6594.85	5891.72	5218.63	1116.61	2387.49	5457.12	5187.43	45587.7	9429.28	2092.04	4669.4	2531.31	1804.98	4267.33
		60	5445.44	3958.88	4357.82	2285.78	11106.4	4624.56	6415.68	14042	1243.03	7905.4	1837.08	2519.89	336.191	1431.36	4124.6	4359.25	6346.44	3896.01	6160.75	5606.8	5845.15	1099.49	3179.67	5179.94	6466.18	63074.6	9944.3	1762.38	4740.49	2516.98	2011.5	4082.71
		70	6134.5	3882.78	4232.61	2472.23	14023.9	4787.21	7074.42	16247.5	1145.61	9712.89	1630.04	2959.06	267.395	1427.93	4266.93	4425.81	6427.46	3789.39	5816.1	5376.69	6433.2	1085.22	4051.32	4956.59	7790.36	82999.3	10401.6	1524.53	4801.44	2504.93	2204.44	3932.87
		80	6801.48	3818.05	4127.05	2645.99	17163.9	4932.71	7699.47	18436.2	1067.42	11609.4	1469.65	3400.89	219.291	1424.96	4394.18	4484.29	6498.48	3699.4	5533.18	5185	6990.2	1073.01	4997.32	4770.92	9154.7	105280	10814.7	1344.6	4854.87	2494.54	2386.46	3807.52
		90	7449.74	3761.84	4036.14	2809.36	20512.3	5064.72	8296.48	20610.2	1002.9	13587.5	1341.33	3845.06	184.097	1422.35	4509.57	4536.51	6561.78	3621.79	5295.06	5021.6	7521.41	1062.35	6013.51	4612.92	10555.2	129849	11192.7	1203.6	4902.5	2485.41	2559.45	3700.27
		100	8081.82	3712.27	3956.51	2964.04	24057.5	5185.8	8869.65	22771.3	948.486	15640.8	1236.07	4291.33	157.429	1420.02	4615.36	4583.74	6618.92	3553.75	5090.76	4879.8	8030.71	1052.91	7096.45	4476.03	11988.5	156648	11542	1090.05	4945.49	2477.27	2724.8	3606.9
0.25	0.75	1	147.165	4242.69	6049.78	182.27	14.4959	1181.77	306.184	186.533	6950.9	21.3271	28157.2	22.6142	94137.8	976.382	1072.1	1865.5	2899.87	5210.33	18192	10922.2	293.237	995.561	3.26598	10688.4	29.3644	27.5097	1927.99	53047.4	2160.9	1829.85	113.027	7054.39
		5	510.585	3464.44	4462.19	413.297	165.52	1695.37	849.504	855.589	2964.8	183.056	8079.98	121.016	8622.23	952.215	1527.78	2185.27	3310.55	3899.88	9973.4	7051.57	797.772	868.623	40.9748	6746.27	205.386	483.301	3083.04	11675.3	2469.24	1740.42	294.094	4774.29
		10	872.463	3174.9	3913.96	588.015	472.429	1980.45	1318.36	1648.78	2054.12	462.046	4719.61	249.216	3079.75	941.991	1779.55	2339.36	3504.88	3442.44	7698.77	5840.45	1227.66	819.067	121.792	5533.42	474.661	1660.72	3773.84	6083.39	2615.24	1703.27	443.965	4035.4
		20	1490.82	2909.56	3433.08	836.595	1348.41	2313.48	2045.99	3177.3	1423.17	1166.24	2756.78	513.226	1100.04	931.878	2072.81	2504.32	3710.62	3038.65	5942.91	4837.35	1889.18	772.338	362.007	4538.61	1096.98	5706.54	4619.42	3169.72	2769.88	1666.91	670.209	3410.87
		30	2039.55	2764.75	3179.66	1028.23	2490.38	2533.67	2645.78	4663.5	1148.23	2004.48	2012.85	783.123	602.381	926.012	2266.27	2606.15	3836.52	2824.78	5107.83	4332.46	2430.96	746.25	684.641	4041.8	1790.67	11747.8	5199.36	2164.73	2864.54	1646	852.782	3091.37
		40	2547.44	2666.39	3011.29	1190.26	3848.66	2702.5	3175.21	6122.86	986.021	2943.67	1610.27	1056.92	392.922	921.873	2414.4	2680.9	3928.43	2682.23	4587.51	4006.53	2907.18	728.276	1076.01	3722.65	2535.19	19608.7	5654.47	1651.57	2933.66	1631.33	1011.75	2882.99
		50	3026.99	2592.52	2886.85	1333.33	5394.4	2841.16	3657.78	7562.59	876.154	3965.86	1354.34	1333.64	282.079	918.675	2535.92	2740.36	4001.24	2576.63	4220.7	3770.7	3339.92	714.633	1527.99	3492.56	3319.96	29176.2	6034.74	1338.91	2988.42	1620.04	1155.19	2731.09
		60	3485.08	2533.69	2789	1462.9	7108.07	2959.72	4106.04	8986.86	795.538	5059.46	1175.73	1612.73	215.162	916.07	2639.74	2789.92	4061.72	2493.44	3942.88	3588.35	3740.9	703.675	2034.99	3315.16	4138.36	40367.8	6364.35	1127.92	3033.91	1610.87	1287.36	2612.94
		70	3926.08	2484.98	2708.87	1582.23	8975.29	3063.81	4527.63	10398.4	733.193	6216.25	1043.23	1893.8	171.133	913.874	2730.83	2832.52	4113.58	2425.21	3722.31	3441.08	4117.25	694.542	2592.84	3172.22	4985.83	53119.5	6657.04	975.697	3072.92	1603.16	1410.84	2517.04
		80	4352.95	2443.55	2641.31	1693.43	10984.9	3156.94	4927.66	11799.2	683.151	7430.04	940.578	2176.57	140.346	911.975	2812.27	2869.94	4159.03	2367.61	3541.23	3318.4	4473.73	686.727	3198.28	3053.39	5859.01	67379.4	6921.44	860.542	3107.12	1596.51	1527.33	2436.81
		90	4767.84	2407.58	2583.13	1797.99	13127.9	3241.42	5309.75	13190.5	641.853	8695.98	858.453	2460.84	117.822	910.304	2886.12	2903.37	4199.54	2317.95	3388.84	3213.83	4813.7	679.906	3848.65	2952.27	6755.31	83103.6	7163.35	770.304	3137.6	1590.66	1638.05	2368.18
		100	5172.37	2375.85	2532.17	1896.98	15396.8	3318.91	5676.58	14573.6	607.031	10010.1	791.085	2746.45	100.755	908.812	2953.83	2933.59	4236.11	2274.4	3258.09	3123.07	5139.66	673.862	4541.73	2864.66	7672.66	100255	7386.91	697.632	3165.12	1585.45	1743.87	2308.42
0.3	0.7	1	102.198	2946.31	4201.24	126.576	10.0666	820.675	212.628	129.537	4827.01	14.8105	19553.6	15.7043	65373.4	678.043	744.513	1295.48	2013.8	3618.29	12633.3	7584.88	203.637	691.362	2.26804	7422.51	20.392	19.1039	1338.88	36838.5	1500.62	1270.73	78.491	4898.88
		5	354.573	2405.86	3098.74	287.012	114.944	1177.34	589.934	594.159	2058.89	127.122	5611.1	84.0392	5987.66	661.26	1060.96	1517.55	2298.99	2708.25	6925.97	4896.93	554.009	603.21	28.4547	4684.91	142.629	335.626	2141	8107.88	1714.75	1208.63	204.232	3315.48
		10	605.877	2204.79	2718.03	408.344	328.076	1375.32	915.528	1144.98	1426.47	320.865	3277.51	173.067	2138.71	654.161	1235.8	1624.56	2433.94	2390.58	5346.36	4055.87	852.539	568.797	84.5775	3842.65	329.626	1153.27	2620.72	4224.57	1816.14	1182.83	308.309	2802.36
		20	1035.29	2020.53	2384.08	580.968	936.398	1606.58	1420.83	2206.46	988.311	809.887	1914.43	356.407	763.92	647.137	1439.45	1739.11	2576.82	2110.18	4127.02	3359.27	1311.93	536.346	251.394	3151.81	761.789	3962.87	3207.93	2201.2	1923.53	1157.58	465.423	2368.66
		30	1416.35	1919.96	2208.1	714.045	1729.43	1759.49	1837.35	3238.54	797.385	1392	1397.81	543.835	418.32	643.064	1573.8	1809.83	2664.25	1961.65	3547.1	3008.65	1688.17	518.229	475.445	2806.81	1243.52	8158.21	3610.67	1503.29	1989.26	1143.06	592.21	2146.78
		40	1769.06	1851.66	2091.17	826.569	2672.68	1876.74	2205	4251.99	684.737	2044.22	1118.24	733.97	272.862	640.189	1676.66	1861.74	2728.08	1862.66	3185.77	2782.31	2018.88	505.747	747.23	2585.17	1760.55	13617.2	3926.72	1146.92	2037.26	1132.87	702.603	2002.08
		50	2102.07	1800.36	2004.76	925.922	3746.11	1973.03	2540.13	5251.8	608.441	2754.07	940.513	926.141	195.888	637.969	1761.06	1903.03	2778.64	1789.33	2931.04	2618.54	2319.39	496.273	1061.11	2425.39	2305.53	20261.2	4190.79	929.798	2075.29	1125.03	802.215	1896.59
		60	2420.2	1759.5	1936.81	1015.9	4936.16	2055.36	2851.41	6240.88	552.457	3513.51	816.479	1119.95	149.418	636.16	1833.16	1937.44	2820.64	1731.56	2738.11	2491.91	2597.85	488.664	1413.19	2302.19	2873.86	28033.2	4419.69	783.28	2106.89	1118.66	894	1814.54
		70	2726.44	1725.68	1881.16	1098.77	6232.84	2127.65	3144.19	7221.12	509.162	4316.84	724.462	1315.14	118.842	634.634	1896.41	1967.03	2856.65	1684.17	2584.93	2389.64	2859.2	482.321	1800.59	2202.93	3462.38	36888.6	4622.94	677.567	2133.97	1113.3	979.749	1747.94
		80	3022.88	1696.91	1834.25	1175.99	7628.4	2192.32	3421.99	8193.86	474.41	5159.75	653.179	1511.51	97.4628	633.316	1952.97	1993.02	2888.22	1644.18	2459.19	2304.44	3106.76	476.894	2221.03	2120.41	4068.76	46791.2	4806.55	597.599	2157.72	1108.68	1060.65	1692.23
		90	3311	1671.93	1793.84	1248.61	9116.58	2250.99	3687.33	9160.08	445.731	6038.87	596.148	1708.92	81.821	632.155	2004.25	2016.23	2916.35	1609.69	2353.36	2231.82	3342.85	472.157	2672.67	2050.19	4691.19	57710.8	4974.55	534.934	2178.89	1104.63	1137.54	1644.57
		100	3591.92	1649.9	1758.45	1317.35	10692.2	2304.8	3942.07	10120.6	421.549	6951.47	549.365	1907.26	69.9686	631.119	2051.27	2037.22	2941.74	1579.45	2262.56	2168.8	3569.21	467.96	3153.98	1989.35	5328.24	69621.4	5129.8	484.467	2198	1101.01	1211.02	1603.07
0.35	0.65	1	75.0842	2164.64	3086.62	92.9947	7.39584	602.945	156.216	95.1699	3546.38	10.8812	14365.9	11.5379	48029.5	498.154	546.989	951.784	1479.53	2658.33	9281.61	5572.56	149.611	507.939	1.66632	5453.27	14.9818	14.0355	983.668	27065	1102.5	933.595	57.6669	3599.18
		5	260.503	1767.57	2276.63	210.866	84.449	864.985	433.421	436.525	1512.65	93.3957	4122.44	61.7431	4399.09	485.824	779.479	1114.93	1689.06	1989.74	5088.47	3597.74	407.027	443.175	20.9055	3441.98	104.789	246.582	1572.98	5956.81	1259.82	887.972	150.048	2435.86
		10	445.134	1619.85	1996.92	300.008	241.035	1010.44	672.633	841.212	1048.02	235.738	2407.97	127.151	1571.3	480.608	907.933	1193.55	1788.2	1756.35	3927.94	2979.82	626.355	417.891	62.1385	2823.17	242.174	847.304	1925.43	3103.77	1334.31	869.016	226.513	2058.88
		20	760.624	1484.47	1751.57	426.834	687.966	1180.35	1043.87	1621.07	726.106	595.019	1406.52	261.85	561.247	475.448	1057.56	1277.71	1893.17	1550.33	3032.09	2468.03	963.87	394.05	184.697	2315.62	559.682	2911.5	2356.85	1617.2	1413.2	850.466	341.944	1740.24
		30	1040.59	1410.59	1622.28	524.605	1270.6	1292.69	1349.89	2379.34	585.834	1022.69	1026.96	399.553	307.337	472.455	1156.26	1329.67	1957.41	1441.22	2606.03	2210.44	1240.29	380.74	349.306	2062.14	913.605	5993.79	2652.74	1104.45	1461.5	839.798	435.093	1577.23
		40	1299.72	1360.41	1536.37	607.275	1963.6	1378.83	1620	3123.91	503.072	1501.87	821.566	539.243	200.47	470.343	1231.83	1367.81	2004.3	1368.48	2340.56	2044.15	1483.26	371.569	548.985	1899.31	1293.47	10004.5	2884.93	842.637	1496.76	832.311	516.198	1470.92
		50	1544.38	1322.72	1472.88	680.269	2752.25	1449.57	1866.22	3858.46	447.018	2023.4	690.989	680.43	143.918	468.712	1293.84	1398.14	2041.45	1314.61	2153.42	1923.83	1704.04	364.609	779.588	1781.92	1693.86	14885.8	3078.95	683.117	1524.7	826.549	589.382	1393.41
		60	1778.1	1292.7	1422.96	746.377	3626.57	1510.06	2094.92	4585.13	405.887	2581.35	599.862	822.822	109.777	467.383	1346.81	1423.43	2072.31	1272.17	2011.67	1830.79	1908.62	359.018	1038.26	1691.41	2111.41	20595.8	3247.12	575.471	1547.92	821.871	656.816	1333.13
		70	2003.1	1267.85	1382.08	807.258	4579.23	1563.17	2310.01	5305.31	374.078	3171.55	532.258	966.223	87.3128	466.262	1393.28	1445.16	2098.76	1237.35	1899.14	1755.65	2100.64	354.358	1322.88	1618.48	2543.79	27101.8	3396.45	497.804	1567.82	817.937	719.816	1284.2
		80	2220.89	1246.71	1347.61	863.996	5604.54	1610.68	2514.11	6019.98	348.546	3790.84	479.887	1110.49	71.6053	465.293	1434.83	1464.26	2121.95	1207.97	1806.75	1693.06	2282.52	350.371	1631.78	1557.85	2989.29	34377.2	3531.35	439.052	1585.27	814.544	779.252	1243.27
		90	2432.57	1228.36	1317.92	917.343	6697.89	1653.79	2709.06	6729.86	327.476	4436.72	437.986	1255.53	60.1134	464.441	1472.51	1481.31	2142.62	1182.63	1729	1639.71	2455.97	346.891	1963.6	1506.26	3446.59	42399.8	3654.77	393.012	1600.82	811.562	835.74	1208.25
		100	2638.96	1212.17	1291.92	967.848	7855.5	1693.32	2896.21	7435.51	309.71	5107.2	403.615	1401.25	51.4055	463.679	1507.06	1496.73	2161.28	1160.41	1662.29	1593.41	2622.27	343.807	2317.21	1461.56	3914.62	51150.4	3768.83	355.935	1614.86	808.905	889.731	1177.76
0.4	0.6	1	57.4864	1657.3	2363.2	71.199	5.66244	461.63	119.603	72.8645	2715.19	8.33088	10998.9	8.83367	36772.6	381.399	418.789	728.71	1132.76	2035.29	7106.24	4266.49	114.546	388.891	1.27577	4175.16	11.4705	10.746	753.121	20721.7	844.1	714.784	44.1512	2755.62
		5	199.447	1353.3	1743.04	161.444	64.6562	662.254	331.838	334.214	1158.13	71.5061	3156.24	47.272	3368.06	371.959	596.789	853.621	1293.18	1523.39	3895.86	2754.52	311.63	339.306	16.0058	2635.26	80.2288	188.79	1204.31	4560.68	964.547	679.853	114.881	1864.96
		10	340.806	1240.2	1528.89	229.694	184.543	773.615	514.985	644.053	802.391	180.487	1843.6	97.3501	1203.03	367.965	695.136	913.813	1369.09	1344.7	3007.33	2281.43	479.553	319.948	47.5748	2161.49	185.415	648.717	1474.16	2376.32	1021.58	665.341	173.424	1576.33
		20	582.352	1136.55	1341.05	326.795	526.724	903.702	799.214	1241.13	555.925	455.562	1076.87	200.479	429.705	364.015	809.691	978.249	1449.46	1186.97	2321.45	1889.59	737.963	301.695	141.409	1772.89	428.506	2229.12	1804.46	1238.17	1081.98	651.138	261.801	1332.37
		30	796.699	1079.98	1242.06	401.65	972.804	989.715	1033.51	1821.68	448.529	783	786.27	305.907	235.305	361.723	885.264	1018.03	1498.64	1103.43	1995.24	1692.37	949.594	291.504	267.438	1578.83	699.479	4589	2031	845.598	1118.96	642.97	333.118	1207.56
		40	995.095	1041.56	1176.28	464.945	1503.38	1055.66	1240.31	2391.74	385.165	1149.87	629.012	412.858	153.485	360.107	943.123	1047.23	1534.54	1047.75	1791.99	1565.05	1135.62	284.483	420.317	1454.16	990.309	7659.66	2208.78	645.144	1145.96	637.238	395.214	1126.17
		50	1182.42	1012.7	1127.68	520.831	2107.19	1109.83	1428.82	2954.14	342.248	1549.16	529.038	520.954	110.187	358.857	990.595	1070.45	1562.98	1006.5	1648.71	1472.93	1304.66	279.153	596.872	1364.28	1296.86	11396.9	2357.32	523.011	1167.35	632.827	451.246	1066.83
		60	1361.36	989.721	1089.45	571.445	2776.59	1156.14	1603.92	3510.49	310.757	1976.35	459.27	629.973	84.0478	357.84	1031.15	1089.81	1586.61	974.002	1540.19	1401.7	1461.29	274.873	794.918	1294.98	1616.55	15768.7	2486.08	440.595	1185.12	629.245	502.875	1020.68
		70	1533.62	970.696	1058.15	618.057	3505.97	1196.8	1768.6	4061.88	286.403	2428.22	407.51	739.765	66.8488	356.982	1066.73	1106.45	1606.87	947.348	1454.03	1344.17	1608.3	271.306	1012.83	1239.15	1947.59	20749.8	2600.41	381.131	1200.36	626.233	551.109	983.217
		80	1700.37	954.512	1031.76	661.497	4290.97	1233.18	1924.87	4609.04	266.856	2902.36	367.413	850.223	54.8228	356.24	1098.54	1121.07	1624.62	924.849	1383.29	1296.25	1747.55	268.253	1249.33	1192.73	2288.68	26320.1	2703.69	336.149	1213.72	623.635	596.615	951.88
		90	1862.44	940.461	1009.03	702.341	5128.07	1266.18	2074.12	5152.55	250.724	3396.87	335.333	961.266	46.0243	355.587	1127.39	1134.13	1640.44	905.448	1323.77	1255.4	1880.35	265.588	1503.38	1153.23	2638.79	32462.3	2798.18	300.9	1225.62	621.352	639.864	925.069
		100	2020.46	928.067	989.127	741.009	6014.36	1296.45	2217.41	5692.82	237.121	3910.2	309.018	1072.83	39.3574	355.005	1153.84	1145.94	1654.73	888.438	1272.69	1219.95	2007.68	263.227	1774.11	1119.01	2997.13	39162	2885.51	272.513	1236.37	619.318	681.2	901.726
0.45	0.55	1	45.4213	1309.47	1867.22	56.256	4.47403	364.745	94.5011	57.5719	2145.34	6.58243	8690.49	6.97969	29054.9	301.353	330.895	575.771	895.022	1608.13	5614.8	3371.06	90.5054	307.272	1.00802	3298.89	9.06309	8.49064	595.058	16372.7	666.944	564.767	34.8849	2177.28
		5	157.588	1069.27	1377.22	127.561	51.0864	523.263	262.193	264.071	915.062	56.4987	2493.82	37.3508	2661.18	293.893	471.537	674.466	1021.77	1203.67	3078.21	2176.41	246.226	268.094	12.6466	2082.18	63.3906	149.167	951.556	3603.5	762.111	537.168	90.7699	1473.55
		10	269.279	979.908	1208.01	181.486	145.811	611.251	406.902	508.881	633.988	142.607	1456.67	76.9186	950.539	290.738	549.244	722.025	1081.75	1062.48	2376.16	1802.61	378.906	252.798	37.59	1707.84	146.5	512.567	1164.77	1877.59	807.173	525.701	137.026	1245.5
		20	460.13	898.013	1059.59	258.208	416.177	714.036	631.478	980.647	439.249	359.95	850.859	158.403	339.52	287.617	639.756	772.937	1145.25	937.856	1834.23	1493.01	583.082	238.376	111.731	1400.81	338.573	1761.28	1425.75	978.309	854.901	514.479	206.855	1052.74
		30	629.49	853.317	981.377	317.353	768.636	781.997	816.6	1439.35	354.393	618.667	621.25	241.705	185.92	285.806	699.468	804.368	1184.11	871.846	1576.49	1337.18	750.297	230.324	211.309	1247.47	552.675	3625.87	1604.74	668.127	884.117	508.026	263.204	954.125
		40	786.248	822.961	929.409	367.364	1187.86	834.104	980.002	1889.77	304.328	908.54	496.997	326.209	121.272	284.529	745.184	827.44	1212.48	827.849	1415.9	1236.58	897.278	224.776	332.102	1148.97	782.467	6052.08	1745.21	509.743	905.45	503.497	312.268	889.813
		50	934.255	800.161	891.003	411.521	1664.94	876.901	1128.95	2334.13	270.418	1224.03	418.006	411.618	87.0613	283.542	782.692	845.791	1234.95	795.257	1302.69	1163.8	1030.84	220.566	471.602	1077.95	1024.68	9004.99	1862.57	413.243	922.35	500.011	356.54	842.929
		60	1075.64	782.002	860.803	451.512	2193.85	913.494	1267.3	2773.72	245.536	1561.56	362.88	497.757	66.4082	282.738	814.736	861.086	1253.62	769.582	1216.94	1107.52	1154.6	217.184	628.084	1023.2	1277.27	12459.2	1964.31	348.124	936.393	497.181	397.333	806.462
		70	1211.75	766.97	836.07	488.342	2770.15	945.621	1397.42	3209.39	226.294	1918.59	321.983	584.506	52.8188	282.06	842.85	874.234	1269.62	748.522	1148.86	1062.06	1270.76	214.365	800.26	979.079	1538.84	16394.9	2054.64	301.141	948.433	494.801	435.444	776.863
		80	1343.5	754.183	815.22	522.664	3390.4	974.363	1520.88	3641.71	210.849	2293.22	290.302	671.781	43.3168	281.474	867.986	885.785	1283.65	730.745	1092.97	1024.2	1380.78	211.953	987.124	942.403	1808.34	20796.1	2136.25	265.599	958.988	492.749	471.4	752.103
		90	1471.55	743.08	797.262	554.936	4051.81	1000.44	1638.81	4071.15	198.103	2683.94	264.955	759.519	36.3649	280.958	890.779	896.101	1296.15	715.416	1045.94	991.921	1485.71	209.848	1187.85	911.195	2084.97	25649.3	2210.91	237.748	968.395	490.945	505.571	730.918
		100	1596.41	733.288	781.533	585.488	4752.09	1024.36	1752.03	4498.03	187.355	3089.54	244.162	847.67	31.0972	280.497	911.675	905.43	1307.44	701.976	1005.58	963.912	1586.31	207.982	1401.77	884.155	2368.11	30942.8	2279.91	215.319	976.888	489.337	538.232	712.475
0.5	0.5	1	36.7913	1060.67	1512.45	45.5674	3.62396	295.443	76.5459	46.6333	1737.72	5.33177	7039.3	5.65355	23534.4	244.096	268.025	466.374	724.968	1302.58	4547.99	2730.56	73.3094	248.89	0.816495	2672.1	7.3411	6.87742	481.997	13261.9	540.224	457.461	28.2568	1763.6
		5	127.646	866.111	1115.55	103.324	41.38	423.843	212.376	213.897	741.201	45.7639	2019.99	30.2541	2155.56	238.054	381.945	546.318	827.637	974.97	2493.35	1762.89	199.443	217.156	10.2437	1686.57	51.3464	120.825	770.761	2918.84	617.31	435.106	73.5236	1193.57
		10	218.116	793.726	978.489	147.004	118.107	495.114	329.59	412.194	513.53	115.511	1179.9	62.3041	769.936	235.498	444.887	584.84	876.22	860.61	1924.69	1460.11	306.914	204.767	30.4479	1383.35	118.665	415.179	943.46	1520.85	653.811	425.818	110.991	1008.85
		20	372.706	727.39	858.27	209.149	337.103	578.369	511.497	794.324	355.792	291.559	689.196	128.306	275.011	232.969	518.202	626.079	927.654	759.663	1485.73	1209.34	472.296	193.085	90.5018	1134.65	274.244	1426.63	1154.86	792.43	692.469	416.728	167.552	852.718
		30	509.887	691.187	794.915	257.056	622.595	633.418	661.446	1165.87	287.059	501.12	503.213	195.781	150.595	231.503	566.569	651.538	959.13	706.195	1276.96	1083.11	607.74	186.562	171.16	1010.45	447.666	2936.96	1299.84	541.183	716.135	411.501	213.196	772.842
		40	636.861	666.599	752.822	297.565	962.165	675.625	793.801	1530.72	246.505	735.918	402.567	264.229	98.2304	230.468	603.599	670.226	982.108	670.557	1146.88	1001.63	726.795	182.069	269.003	930.663	633.798	4902.19	1413.62	412.892	733.414	407.832	252.937	720.749
		50	756.747	648.13	721.712	333.332	1348.6	710.29	914.446	1890.65	219.039	991.464	338.585	333.411	70.5197	229.669	633.981	685.09	1000.31	644.158	1055.18	942.674	834.981	178.658	381.998	873.14	829.989	7294.04	1508.69	334.727	747.104	405.009	288.797	682.773
		60	871.27	633.421	697.251	365.725	1777.02	739.93	1026.51	2246.72	198.884	1264.86	293.933	403.183	53.7906	229.018	659.936	697.48	1015.43	623.361	985.721	897.088	935.224	175.919	508.748	828.79	1034.59	10091.9	1591.09	281.981	758.479	402.717	321.84	653.234
		70	981.52	621.246	677.217	395.557	2243.82	765.953	1131.91	2599.6	183.298	1554.06	260.806	473.449	42.7833	228.468	682.708	708.129	1028.39	606.303	930.576	860.27	1029.31	173.636	648.211	793.054	1246.46	13279.9	1664.26	243.924	768.231	400.789	352.71	629.259
		80	1088.24	610.888	660.329	423.358	2746.22	789.234	1231.91	2949.79	170.788	1857.51	235.145	544.142	35.0866	227.994	703.069	717.486	1039.76	591.903	885.308	829.6	1118.43	171.682	799.57	763.347	1464.75	16844.8	1730.36	215.136	776.78	399.126	381.834	609.203
		90	1191.96	601.895	645.782	449.498	3281.97	810.356	1327.44	3297.63	160.463	2173.99	214.613	615.21	29.4555	227.576	721.531	725.842	1049.88	579.487	847.21	803.456	1203.43	169.977	962.162	738.068	1688.83	20775.9	1790.84	192.576	784.4	397.666	409.513	592.044
		100	1293.09	593.963	633.041	474.246	3849.19	829.728	1419.14	3643.4	151.758	2502.53	197.771	686.613	25.1887	227.203	738.457	733.398	1059.03	568.6	814.522	780.769	1284.91	168.466	1135.43	716.165	1918.17	25063.7	1846.73	174.408	791.279	396.363	435.968	577.104

## Sheet: Table S3
Table S3. The TPL (Taylor’s Power Law) parameters for single-species populations of the AGP study
Species ID	b	ln(a)	CACD	R	p	N	Mean population abundance
Bacteroidetes_4468234	3.35872	-10.6684	97.7018	0.772065	0.000121125	26	2634.91
Bacteroidetes_4447072	2.56968	-3.29859	9.45488	0.79862	6.05528e-05	26	999.894
Firmicutes_4481131	2.52713	-2.98765	9.51998	0.80453	0.000139717	26	800.026
Bacteroidetes_4467447	2.99616	-5.76821	19.4951	0.842463	2.9431e-06	26	688.907
Firmicutes_4457438	2.57079	-2.68745	6.60241	0.833842	3.9223e-06	26	593.978
Firmicutes_4478125	2.2794	-1.0172	3.25737	0.794652	0.000266241	26	559.467
Firmicutes_4476527	2.78232	-3.51464	7.62376	0.868753	1.34494e-06	26	370.871
Bacteroidetes_4449054	3.21085	-5.46901	12.0866	0.927347	6.41707e-10	26	359.329
Bacteroidetes_4365130	2.96169	-4.68573	11.4055	0.863819	9.21962e-07	26	340.003
Bacteroidetes_4457872	3.30144	-6.40357	16.3562	0.914301	1.94929e-09	26	329.928
Verrucomicrobia_4306262	2.28667	0.745181	0.610847	0.944483	1.22833e-11	26	317.99
Bacteroidetes_4436552	1.95486	3.09962	0.052248	0.960533	2.78365e-12	26	317.814
Bacteroidetes_4447950	2.39784	-0.441716	1.5518	0.91295	5.66531e-09	26	304.383
Bacteroidetes_4453609	2.9125	-4.3158	9.99248	0.807698	1.57854e-05	26	240.071
Bacteroidetes_4479397	2.52664	-0.781922	1.77911	0.930142	1.49675e-09	26	238.972
Bacteroidetes_847228	2.79064	-3.14955	6.01379	0.873665	1.17707e-06	26	238.012
Bacteroidetes_4483963	2.35338	-0.109554	1.22592	0.909632	1.03341e-09	26	225.576
Bacteroidetes_4477861	2.23331	0.446736	0.873008	0.895502	7.79544e-07	26	224.375
Firmicutes_173876	1.85142	2.60344	0.0903318	0.887431	1.66997e-07	26	199.718
Firmicutes_4464173	2.67246	-2.08252	3.70667	0.885672	7.88177e-08	26	187.29
Firmicutes_4465907	3.39309	-6.28553	13.9794	0.878455	1.58404e-07	26	178.885
Bacteroidetes_178478	2.70147	-1.93441	3.26554	0.915509	2.87558e-09	26	169.343
Bacteroidetes_4410166	2.06575	2.92623	0.0792412	0.982393	2.66454e-16	26	161.785
Firmicutes_4468391	2.87727	-2.84195	4.65594	0.919443	6.73852e-10	26	161.566
Bacteroidetes_189083	2.01246	2.98906	0.0574164	0.975975	9.39249e-16	26	161.073
Firmicutes_4426438	2.97958	-3.65473	6.52634	0.888168	1.42473e-07	26	157.738
Firmicutes_4478815	2.97698	-4.01772	7.81389	0.874257	8.45123e-07	26	153.422
Firmicutes_4480244	1.97247	2.47396	0.112944	0.922441	3.46211e-09	26	151.952
Firmicutes_4346675	3.19998	-4.94171	9.64082	0.882081	2.41416e-06	26	151.592
Firmicutes_2407149	2.63786	-2.17713	4.0739	0.84881	1.04988e-05	26	148.408
Firmicutes_3409358	2.16801	1.13711	0.440043	0.90721	3.01397e-08	26	145.039
Firmicutes_191718	3.1812	-4.44486	7.78667	0.91546	3.74499e-08	26	138.226
Firmicutes_3138798	2.57264	-1.26701	2.39977	0.903253	1.08594e-08	26	136.046
Actinobacteria_4347159	2.54864	-0.498678	1.45826	0.944458	3.63369e-10	26	135.844
Firmicutes_4412540	2.37871	0.0336601	1.07054	0.91806	5.0674e-10	26	130.756
Bacteroidetes_4414420	2.10136	2.20144	0.152165	0.959132	2.79159e-12	26	115.474
Firmicutes_4480359	2.38165	-0.676025	1.83294	0.839053	1.39198e-05	26	112.954
Verrucomicrobia_548475	2.1349	2.47428	0.121686	0.980544	2.86438e-16	26	109.891
Firmicutes_4465072	2.65892	-1.27586	2.24451	0.916143	3.55497e-09	26	108.72
Firmicutes_4474380	2.70222	-2.62523	4.98849	0.838879	1.02313e-05	26	105.597
Firmicutes_4416570	2.98104	-3.68873	6.67654	0.864119	4.8524e-06	26	101.941
Verrucomicrobia_192963	2.05502	2.73721	0.0837409	0.976697	2.57572e-16	26	100.942
Firmicutes_4443172	2.43382	-0.645791	1.73375	0.870257	4.82506e-07	26	98.685
Firmicutes_4471854	2.97021	-3.30386	5.4421	0.874475	8.18701e-07	26	91.7889
Firmicutes_4371061	3.61327	-6.40338	11.6048	0.877517	2.28445e-06	26	90.2654
Firmicutes_48084	2.08976	1.54115	0.294115	0.917178	2.96191e-08	26	86.4243
Proteobacteria_4448331	1.86829	1.91577	0.215162	0.86306	6.59785e-06	26	84.2417
Proteobacteria_4449236	2.34441	0.166388	0.957018	0.897726	1.02335e-07	26	81.4956
Firmicutes_4352657	3.36482	-4.81175	7.68995	0.910924	7.5638e-09	26	80.757
Firmicutes_4481427	2.30004	0.354441	0.884616	0.887822	2.19028e-07	26	80.2247
Firmicutes_4414476	2.60425	-1.2582	2.2823	0.882145	2.4014e-07	26	80.2084
Bacteroidetes_4449055	1.96862	3.27215	0.0467916	0.97921	1.84253e-14	26	75.6843
Firmicutes_16340	2.17767	1.6468	0.281105	0.936081	4.35934e-11	26	72.9525
Proteobacteria_4415338	2.22806	2.78582	0.104189	0.996763	0	26	71.1412
Firmicutes_2582660	3.23443	-4.30235	6.89082	0.878857	2.23367e-07	26	70.8568
Bacteroidetes_185420	3.19498	-4.00325	6.24643	0.879188	1.22011e-06	26	70.7217
Bacteroidetes_4447188	2.26203	1.65828	0.289223	0.964854	1.48779e-13	26	70.4406
Firmicutes_4409730	2.82797	-1.86211	2.8317	0.913548	4.99542e-09	26	70.127
Proteobacteria_4385479	2.26095	2.72664	0.115887	0.995557	0	26	67.8228
Bacteroidetes_4476780	2.59348	-0.668446	1.57093	0.92277	8.26465e-10	26	64.7508
Firmicutes_4425669	2.01875	2.07712	0.161261	0.911113	2.14286e-08	26	63.0733
Bacteroidetes_4437362	2.31672	0.684855	0.632703	0.918864	5.4336e-09	26	62.9117
Firmicutes_2056702	2.34203	0.508032	0.731486	0.906598	2.00696e-07	26	61.3747
Proteobacteria_4450877	2.14689	3.17807	0.0629824	0.997739	0	26	61.3652
Firmicutes_4472174	2.68312	-0.802541	1.64421	0.94044	7.69411e-11	26	61.1527
Firmicutes_4437359	2.96848	-2.51333	3.63884	0.905975	1.12212e-08	26	60.8873
Firmicutes_2771891	2.57747	-0.203098	1.17037	0.951049	2.97202e-12	26	58.9274
Bacteroidetes_181432	1.95083	3.21853	0.0400073	0.972766	4.44533e-15	26	58.4372
Actinobacteria_4462432	2.25895	1.95078	0.221527	0.978217	6.9722e-16	26	58.3401
Firmicutes_3943186	2.46463	0.273539	0.868425	0.9357	3.24714e-10	26	55.8092
Firmicutes_4326870	1.92972	3.21071	0.0373432	0.967557	3.33926e-13	26	55.8004
Firmicutes_3931537	3.29297	-3.85292	5.38418	0.900152	3.50919e-08	26	53.702
Firmicutes_505670	2.4539	0.961012	0.523908	0.975716	1.54543e-15	26	53.4861
Firmicutes_163243	1.94124	3.0271	0.047963	0.960648	1.28472e-12	26	52.2899
Firmicutes_4483045	2.56107	-0.814372	1.76977	0.881138	4.20218e-07	26	51.6151
Bacteroidetes_319621	2.02352	2.6885	0.0832997	0.961494	3.69096e-13	26	51.1113
Bacteroidetes_4434579	1.95629	3.38619	0.0318644	0.984534	1.57652e-16	26	49.8588
Bacteroidetes_3562626	1.99897	3.24535	0.0478793	0.984465	1.55431e-17	26	49.7895
Bacteroidetes_4399109	2.15854	3.00795	0.0758883	0.995512	0	26	48.6891
Firmicutes_4468466	2.5356	-0.397855	1.35682	0.900612	4.94331e-09	26	48.5078
Firmicutes_3235048	1.75029	3.72375	0.0133575	0.945856	3.53166e-10	26	47.48
Firmicutes_176312	2.6831	-1.82481	3.07876	0.824582	0.000192688	26	47.3883
Firmicutes_4402903	2.13861	1.89639	0.214275	0.937934	2.49879e-09	26	46.7692
Bacteroidetes_3090117	2.3046	1.42329	0.347681	0.962173	7.23537e-13	26	46.444
Bacteroidetes_4356080	2.03545	2.33951	0.120829	0.938601	4.82817e-10	26	45.8635
Firmicutes_4372973	2.48331	0.0883594	0.978813	0.90912	8.12742e-09	26	45.7386
Firmicutes_4364405	2.18561	1.05586	0.480305	0.887424	5.38552e-07	26	45.7142
Firmicutes_4454507	2.62235	0.267416	0.860088	0.975864	1.29674e-15	26	45.1093
Firmicutes_176306	2.01423	0.636123	0.729821	0.77891	0.000101267	26	45.0496
Firmicutes_2740950	2.06544	2.52682	0.10216	0.960172	6.7278e-13	26	43.9063
Firmicutes_1504042	2.44219	-0.710687	1.75802	0.850824	4.60974e-06	26	43.5845
Actinobacteria_1142029	2.2674	1.77223	0.262226	0.9695	1.65334e-14	26	42.5071
Firmicutes_672440	2.26333	1.64283	0.286759	0.959985	1.24144e-11	26	42.3551
Firmicutes_4426051	2.80517	-1.9326	2.95679	0.858299	1.22713e-06	26	41.9484
Firmicutes_4472202	2.98595	-2.26103	3.14619	0.89503	2.79739e-08	26	40.8934
Firmicutes_4476604	2.51683	0.724145	0.632727	0.971263	7.08766e-15	26	40.7284
Firmicutes_4465124	2.30104	1.14197	0.446988	0.938146	1.20092e-10	26	40.6076
Bacteroidetes_4470870	1.87989	2.96015	0.0488362	0.940267	2.44046e-10	26	40.1568
Firmicutes_4425663	2.2009	1.33268	0.356022	0.905396	3.60132e-08	26	38.5526
Proteobacteria_4361528	2.18657	3.15344	0.0705333	0.997203	0	25.98	38.2288
Firmicutes_4425214	3.04485	-1.9847	2.65096	0.944524	2.72357e-11	26	38.2098
Proteobacteria_3232397	2.13733	3.30809	0.0550496	0.99755	0	25.94	37.4168
Firmicutes_157338	2.0488	2.33784	0.119435	0.944889	6.32286e-11	26	37.4134
Bacteroidetes_4232045	2.11195	2.06541	0.179242	0.947753	2.74647e-11	26	37.3191
Proteobacteria_4430952	2.24886	2.86209	0.101906	0.996142	0	26	36.6721
Firmicutes_2814830	2.80836	-1.59327	2.44487	0.88811	4.52249e-07	26	36.3727
Firmicutes_2532173	2.72791	-0.97177	1.78735	0.918153	7.8065e-10	26	35.778
Bacteroidetes_165118	1.67459	3.75662	0.00852195	0.941498	4.62656e-08	26	34.8126
Proteobacteria_4482374	2.15406	3.23707	0.0611274	0.996879	0	25.98	34.7088
Firmicutes_229919	2.35503	0.934919	0.522627	0.931077	3.07392e-10	26	34.6171
Firmicutes_178082	2.56352	-0.0836311	1.07945	0.920745	4.18229e-09	26	33.9199
Firmicutes_4423553	1.936	2.70498	0.0705466	0.936503	1.66006e-09	26	33.6965
Bacteroidetes_366147	2.18956	2.27994	0.152337	0.975017	1.76748e-15	26	33.6796
Firmicutes_4480529	2.94796	-2.26158	3.21217	0.878444	1.97759e-07	26	33.1215
Firmicutes_4405104	2.22539	0.585365	0.717307	0.860269	1.19922e-06	26	33.0333
Proteobacteria_359872	2.35044	-0.224583	1.28215	0.832118	2.34046e-05	26	32.6911
Firmicutes_4454432	2.40909	0.927416	0.533835	0.946046	2.25009e-11	26	32.4793
Firmicutes_731422	2.10231	2.54992	0.105884	0.970857	6.57918e-15	26	32.4773
Firmicutes_179159	2.03211	2.82761	0.0698649	0.969437	2.10409e-14	26	31.4202
Firmicutes_4479443	2.49315	-0.0251773	1.05478	0.908305	9.91955e-08	26	31.2926
Bacteroidetes_4372003	2.19522	1.88049	0.220839	0.95477	3.55832e-12	26	31.1921
Firmicutes_3903651	2.87323	-1.42472	2.17126	0.901287	1.45667e-07	26	30.9002
Proteobacteria_4450795	2.17337	3.05218	0.0745432	0.996095	0	25.96	30.4033
Firmicutes_4451899	2.37669	0.263732	0.867649	0.88226	8.24382e-08	26	30.2906
Firmicutes_194597	1.85059	3.25981	0.0265099	0.954036	9.89117e-12	26	29.575
Proteobacteria_4432796	1.77566	3.33764	0.0224409	0.941843	2.1796e-10	26	29.5472
Firmicutes_4434334	2.60308	-0.123977	1.10081	0.925648	3.98222e-10	26	29.4773
Bacteroidetes_190913	2.79057	-1.32183	2.10749	0.896948	1.18792e-07	26	29.2695
Firmicutes_4439469	3.22738	-2.18736	2.67493	0.959312	1.19637e-12	26	29.1473
Firmicutes_4004998	2.53589	-0.0775627	1.08804	0.91067	3.77627e-08	26	28.8486
Firmicutes_4300690	2.16107	1.87234	0.21486	0.9451	3.88546e-11	26	28.8106
Firmicutes_4301511	2.86329	-1.8127	2.66955	0.861038	4.45496e-07	26	28.334
Bacteroidetes_315846	1.80721	3.23827	0.0232018	0.940221	3.82533e-10	26	28.1881
Firmicutes_4331360	2.32978	0.0574494	1.02142	0.864172	1.40157e-06	26	28.1365
Firmicutes_4446058	2.63656	0.858084	0.594489	0.98605	0	26	27.8181
Firmicutes_4424063	2.79872	-1.75912	2.68688	0.843806	8.63443e-06	26	27.4542
Firmicutes_4419459	2.31215	1.51917	0.323859	0.965357	4.4742e-14	26	27.2485
Firmicutes_185203	2.99651	-2.58951	3.65962	0.831892	3.63315e-06	26	27.0136
Proteobacteria_325850	2.28021	1.96317	0.219282	0.980602	5.06928e-15	26	26.7882
Firmicutes_4459196	2.51277	0.363207	0.802997	0.927418	2.80565e-09	26	26.6015
Firmicutes_125624	2.71812	-0.9324	1.74254	0.890025	6.96455e-08	26	26.313
Bacteroidetes_187178	2.24232	2.11505	0.186706	0.977127	1.53433e-15	26	26.1432
Bacteroidetes_1944498	2.97729	-2.68158	3.87868	0.813888	9.46486e-05	26	26.0387
Tenericutes_4428714	2.16615	2.24976	0.152006	0.967108	6.38312e-14	26	25.998
Bacteroidetes_2617854	2.25475	0.565436	0.684295	0.855579	1.64194e-06	26	25.7726
Proteobacteria_4435655	1.99566	2.82175	0.0637189	0.959036	3.457e-12	26	25.3401
Firmicutes_4448492	2.91229	-1.72421	2.47596	0.873611	4.32e-07	26	25.1127
Bacteroidetes_3565293	2.05064	3.42409	0.0390829	0.994919	0	25.96	24.9409
Firmicutes_730906	2.64915	-0.6981	1.55229	0.884915	4.42849e-07	26	24.8907
Proteobacteria_710275	2.13712	3.37677	0.0515769	0.997344	0	25.78	24.5424
Bacteroidetes_173773	2.06983	3.30215	0.0464866	0.994021	0	25.98	24.3741
Firmicutes_4404187	1.98131	3.23023	0.0432079	0.98135	1.12799e-15	26	24.3625
Actinobacteria_650171	2.2387	2.25935	0.164841	0.97913	2.9754e-16	26	24.2064
Proteobacteria_4454839	2.11799	1.97332	0.196566	0.934171	7.01153e-09	26	23.9667
Bacteroidetes_1106254	2.04475	3.42397	0.0388542	0.995452	0	25.76	23.78
Bacteroidetes_178387	2.13347	3.38475	0.0509294	0.997239	0	25.92	23.63
Firmicutes_4476065	1.9872	2.80878	0.0639475	0.961806	1.11021e-12	26	23.5248
Bacteroidetes_4358599	2.03526	3.61219	0.030808	0.997648	0	25.38	23.1568
Tenericutes_4305923	2.07104	3.01181	0.0621719	0.984851	2.22045e-18	25.98	23.0183
Firmicutes_174818	2.27666	-0.0942106	1.18994	0.824531	1.55196e-05	26	22.8432
Bacteroidetes_4336943	2.12553	2.54106	0.109569	0.974884	1.98286e-15	26	22.7128
Bacteroidetes_4378081	2.23581	2.40574	0.147368	0.983093	2.88658e-17	26	22.628
Firmicutes_183296	2.27728	1.00908	0.478878	0.907456	1.53807e-07	26	22.169
Actinobacteria_4481613	2.74921	-0.544549	1.37769	0.928301	7.07159e-10	26	21.8221
Proteobacteria_4477696	2.62518	0.493676	0.746699	0.962775	3.68889e-13	26	21.7841
Proteobacteria_841635	2.0247	2.51249	0.0914459	0.949513	6.36378e-12	26	21.7447
Firmicutes_179358	2.52671	-0.833875	1.8071	0.798292	0.000357069	26	21.7441
Firmicutes_4102199	2.6874	-0.587376	1.44591	0.902028	3.11332e-08	26	21.7427
Bacteroidetes_4483046	2.60869	-0.29408	1.22776	0.90516	2.27485e-08	26	21.4426
Firmicutes_248902	2.68774	0.0592128	0.972486	0.953964	1.45855e-12	26	21.427
Firmicutes_179585	2.59905	0.538379	0.720963	0.963257	2.79323e-13	26	21.4196
Proteobacteria_61102	2.12961	3.40921	0.0490854	0.99707	0	25.66	21.3829
Bacteroidetes_1135084	2.25213	2.18585	0.182346	0.971582	7.36256e-14	26	21.3103
Firmicutes_4480861	1.91474	3.42238	0.0276919	0.980075	9.06386e-15	26	21.2953
Firmicutes_4414822	3.08361	-1.73398	2.30185	0.935925	9.23893e-11	26	21.1792
Firmicutes_174840	2.31117	-0.0137102	1.07199	0.829227	9.3914e-06	26	21.1337
Bacteroidetes_1105984	2.02179	2.86584	0.0644369	0.972804	6.20615e-15	26	20.7746
Firmicutes_173863	2.12683	0.0937632	1.05446	0.765303	0.000198	26	20.6558
Firmicutes_196381	2.12515	2.56134	0.106861	0.976071	2.95319e-16	26	20.5614
Proteobacteria_4439606	2.22401	3.06967	0.0818746	0.995936	0	25.98	20.5601
Firmicutes_1096610	2.52346	1.08529	0.496456	0.975544	3.81695e-15	26	20.2125
Proteobacteria_4008562	2.08989	3.57309	0.0379597	0.997883	0	24.98	20.0414
Firmicutes_171532	2.11916	0.551784	0.702088	0.826301	3.53526e-05	26	20.0129
Proteobacteria_801210	1.91413	2.98123	0.0439232	0.951666	7.14555e-11	26	19.9939
Firmicutes_186321	2.30916	1.13741	0.442655	0.914279	5.67341e-09	26	19.9695
Bacteroidetes_4454586	2.61655	-1.07671	1.97368	0.803571	7.65774e-06	26	19.9498
Firmicutes_194297	2.18436	1.91448	0.210172	0.945408	1.27168e-11	26	19.8398
Firmicutes_4482516	2.53388	0.960084	0.541467	0.968493	2.74445e-13	26	19.7556
Firmicutes_4405146	2.04176	3.15189	0.0498903	0.985388	1.77636e-17	26	19.7522
Firmicutes_179620	1.92091	3.18704	0.0363863	0.966506	7.95586e-14	26	19.3483
Firmicutes_4469576	2.84527	-0.423973	1.26588	0.950273	2.28305e-11	26	19.1086
Proteobacteria_2211108	2.0975	3.51158	0.0410028	0.997337	0	25.64	19.0265
Firmicutes_4356065	2.72568	-0.554702	1.39971	0.894772	7.68845e-08	26	18.8927
Bacteroidetes_4430843	2.20792	2.43224	0.136668	0.97932	2.84217e-16	26	18.7074
Bacteroidetes_846127	2.02765	2.81142	0.0703376	0.96882	2.61746e-14	26	18.389
Firmicutes_2403301	2.04925	2.74682	0.07895	0.9682	2.99183e-14	26	18.3225
Firmicutes_3537197	2.72179	-0.467441	1.32536	0.915522	2.15603e-08	26	18.2688
Firmicutes_3302038	2.07043	1.56916	0.272005	0.883264	7.00354e-07	26	18.224
Firmicutes_4456027	2.4888	-0.315435	1.26512	0.841618	1.2031e-05	26	17.9253
Firmicutes_4442899	2.15719	2.06593	0.174929	0.947702	3.25053e-11	26	17.8215
Firmicutes_3236435	2.38631	0.662291	0.641125	0.898303	4.97342e-08	26	17.7746
Firmicutes_4472091	2.96967	-1.70864	2.38137	0.849819	2.39354e-06	26	16.8615
Bacteroidetes_310215	2.08541	3.45199	0.0420403	0.996653	0	25.72	16.7868
Firmicutes_193968	2.883	-1.64796	2.4034	0.829151	0.000230501	26	16.6816
Firmicutes_1122673	2.12921	2.14136	0.165146	0.942774	2.70461e-11	26	16.389
Firmicutes_2943548	2.99731	-1.09434	1.7308	0.931838	1.27564e-10	26	16.3842
Firmicutes_4469233	2.31818	1.28428	0.392654	0.931135	9.10935e-10	26	16.2111
Firmicutes_174174	2.43561	0.191032	0.908595	0.873374	1.50814e-06	26	16.1656
Firmicutes_4468384	2.21606	1.40595	0.329449	0.922765	3.71124e-07	26	15.9559
Firmicutes_4470603	2.12138	2.92758	0.0757813	0.987322	0	26	15.8778
Firmicutes_4472130	2.74351	-0.813358	1.6045	0.876669	2.50446e-06	26	15.8683
Firmicutes_4403632	3.06061	-1.71956	2.30546	0.873335	6.60197e-07	26	15.7536
Firmicutes_180468	3.0503	-2.1087	2.78562	0.822383	1.7515e-05	26	15.5642
Firmicutes_4442130	2.97814	-0.378661	1.21156	0.980626	1.55431e-17	26	15.5207
Bacteroidetes_297414	2.26262	2.92825	0.0986449	0.995663	0	26	15.4243
Firmicutes_4468506	2.50029	0.821312	0.58802	0.942625	1.11977e-10	26	15.313
Firmicutes_178845	1.94123	2.80582	0.0596122	0.939209	1.6582e-10	26	15.2145
Proteobacteria_4453773	1.92644	2.83516	0.053354	0.941634	1.70699e-09	26	15.1704
Bacteroidetes_2730944	2.16652	3.15576	0.0674235	0.994717	0	26	15.0801
Proteobacteria_706432	2.0372	3.78879	0.0259933	0.998107	0	20.62	15.0774
Bacteroidetes_171772	1.88566	3.46781	0.023258	0.977652	2.7125e-14	26	15.0489
Firmicutes_755148	2.465	1.50556	0.360848	0.975636	1.62759e-15	26	14.9817
Firmicutes_4326866	2.11232	2.18071	0.157206	0.940025	5.56173e-10	26	14.9803
Firmicutes_300829	2.17509	3.13065	0.0705288	0.994283	0	26	14.9063
Firmicutes_178713	2.04305	2.60515	0.0919999	0.959439	1.79832e-13	26	14.8839
Bacteroidetes_1077373	2.53075	1.08363	0.50149	0.962034	7.34652e-13	26	14.4107
Firmicutes_4402605	2.07962	2.87901	0.0729605	0.977151	8.01581e-16	26	14.222
Firmicutes_4452400	2.47821	0.929918	0.541085	0.944129	8.44464e-12	26	14.1609
Bacteroidetes_191251	2.70746	-0.790874	1.59645	0.870019	5.02168e-07	26	14.127
Firmicutes_4427459	2.01948	2.42335	0.103278	0.937194	2.60754e-10	26	14.0788
Bacteroidetes_174831	2.11763	2.95407	0.0727256	0.987916	0	26	13.795
Bacteroidetes_177679	1.98103	3.49722	0.0292708	0.9925	0	25.88	13.5995
Firmicutes_193709	2.2407	0.0983188	0.959109	0.806515	2.28365e-05	26	13.4406
Firmicutes_363430	2.05989	3.20956	0.0493373	0.989467	0	25.96	13.4216
Bacteroidetes_182886	2.82443	-0.985367	1.72193	0.859565	4.33807e-06	26	13.279
Firmicutes_4398028	2.25506	1.77746	0.252436	0.943324	1.97408e-11	26	12.8398
Bacteroidetes_4307093	2.04418	3.70663	0.0288673	0.998197	0	24.26	12.8344
Firmicutes_323135	2.0533	2.48691	0.103734	0.946465	2.96806e-11	26	12.7257
Firmicutes_4429557	2.21704	2.84971	0.0975501	0.991843	0	26	12.5275
Proteobacteria_4338624	2.06583	2.96863	0.0633699	0.982104	1.11022e-16	26	12.4406
Firmicutes_2368865	2.11101	2.25703	0.139112	0.943722	4.23922e-10	26	12.4399
Firmicutes_4356062	2.36266	1.17663	0.434676	0.921619	5.34226e-09	26	12.3476
Proteobacteria_4447105	2.11147	3.35839	0.0491792	0.995839	0	25.86	12.2261
Bacteroidetes_1134151	2.28817	1.48338	0.32432	0.936213	3.47932e-11	26	12.2084
Cyanobacteria_269386	2.20902	2.30515	0.149947	0.977273	9.99201e-16	26	12.169
Firmicutes_4458576	2.42423	0.687163	0.630883	0.899133	4.57265e-08	26	12.053
Proteobacteria_4299126	1.97738	3.05383	0.0454351	0.975461	6.32161e-15	26	11.9117
Bacteroidetes_4412168	3.50656	-3.42592	3.8965	0.812185	1.06555e-05	26	11.8622
Firmicutes_178773	2.26254	1.82552	0.242464	0.956431	8.20255e-13	26	11.7597
Firmicutes_4366089	2.39008	0.791832	0.576445	0.897902	5.29702e-08	26	11.7169
Firmicutes_2829179	2.02787	3.27596	0.0430502	0.988143	0	26	11.6062
Firmicutes_145801	2.56237	1.19501	0.469346	0.968482	2.774e-13	26	11.5635
Firmicutes_2307779	2.92977	-0.74607	1.47269	0.916154	5.03324e-09	26	11.5547
Firmicutes_187504	2.75126	-0.492056	1.32769	0.882461	1.25392e-07	26	11.4725
Firmicutes_176115	2.71171	-0.592854	1.41886	0.876133	3.26986e-07	26	11.4223
Firmicutes_4473509	2.90402	-0.71247	1.45517	0.901491	1.57701e-08	26	11.2566
Firmicutes_157424	1.94315	3.39119	0.0288723	0.981977	1.39888e-16	25.86	11.2301
Proteobacteria_780555	1.75394	3.09165	0.0241093	0.934715	1.62439e-09	26	11.224
Firmicutes_1790209	2.53781	0.886841	0.566905	0.952076	8.18945e-13	26	11.0835
Firmicutes_753638	2.30031	1.81365	0.253754	0.953464	1.51388e-11	26	11.0591
Bacteroidetes_4442459	2.53061	1.38931	0.405877	0.976321	5.26246e-16	26	10.9878
Firmicutes_1100972	2.43727	2.03685	0.244531	0.986136	0	26	10.9654
Firmicutes_184534	2.20907	2.54173	0.124452	0.979898	8.21565e-17	26	10.9287
Firmicutes_181862	2.63701	0.309496	0.834105	0.917458	5.9713e-09	26	10.8432
Firmicutes_304871	2.09619	2.3067	0.12755	0.949555	6.31604e-12	26	10.7671
Firmicutes_1102370	2.05357	2.05195	0.153692	0.917621	1.39586e-08	26	10.7447
Firmicutes_4444262	2.53647	1.31375	0.428797	0.966659	7.55329e-14	26	10.7176
Firmicutes_148354	2.17181	2.1158	0.171831	0.944935	6.55608e-10	26	10.7135
Bacteroidetes_138179	2.41518	1.92985	0.257268	0.980177	1.55431e-16	26	10.6375
Bacteroidetes_175844	2.15336	2.38542	0.130636	0.962046	2.98646e-13	26	10.5384
Firmicutes_182073	2.30442	1.46365	0.335325	0.927595	7.6381e-10	26	10.3944
Tenericutes_3232988	1.99846	2.77299	0.0673975	0.959947	1.53026e-12	26	10.2417
Euryarchaeota_152450	2.46426	1.74709	0.30522	0.979097	2.06501e-16	26	10.2281
Firmicutes_184394	2.95534	-0.790502	1.49656	0.912278	2.1241e-09	26	10.0964
Firmicutes_4443143	1.73748	3.18397	0.0172181	0.938239	2.36149e-09	25.98	10.0842
Firmicutes_193679	2.82131	-0.757541	1.51482	0.863218	1.13983e-06	26	10.0577
Firmicutes_179744	2.52821	1.32776	0.42348	0.969429	1.11178e-14	26	10.0523
Firmicutes_4385326	2.35432	0.763488	0.585632	0.893491	6.54977e-08	26	9.98099
Proteobacteria_4333943	2.02604	3.38341	0.0378918	0.992488	0	25.96	9.98031
Bacteroidetes_495451	2.47365	1.61131	0.336831	0.975809	4.32987e-16	26	9.97624
Proteobacteria_4482598	2.0348	3.74995	0.0267405	0.997587	0	21.76	9.92261
Firmicutes_176062	2.02002	2.1638	0.129947	0.903892	5.86021e-08	26	9.91446
Firmicutes_4465746	2.41207	1.55264	0.33879	0.95963	6.17226e-12	26	9.8167
Proteobacteria_3944484	2.38846	2.2234	0.202513	0.987572	0	26	9.81195
Firmicutes_2979308	2.88514	0.0701889	0.966046	0.945658	5.89096e-11	26	9.74338
Firmicutes_183139	1.94631	3.31261	0.0320247	0.982489	1.37668e-16	25.98	9.64834
Proteobacteria_1141678	2.17063	3.03368	0.0753533	0.991955	0	26	9.62729
Firmicutes_173810	2.00056	3.52825	0.0299494	0.994146	0	25.78	9.54039
Firmicutes_297635	2.04801	3.04032	0.0566355	0.982153	1.06581e-16	25.98	9.49627
Firmicutes_338301	2.42242	1.37383	0.390449	0.946694	7.92419e-12	26	9.45689
Firmicutes_180112	2.00424	3.29024	0.0389594	0.987638	0	25.98	9.36456
Firmicutes_4344883	2.17713	2.68173	0.104333	0.980041	2.04281e-16	26	9.31772
Firmicutes_4429981	2.19747	2.95108	0.0856895	0.991507	0	26	9.2539
Bacteroidetes_4324245	2.04953	3.56916	0.0337077	0.996344	0	25.46	9.00136
Tenericutes_301109	1.99832	3.79354	0.022473	0.998274	0	22.08	8.98642
Firmicutes_3589845	1.90928	3.59156	0.0196901	0.990683	4.44089e-18	25.42	8.94569
Firmicutes_15728	2.95674	-1.34216	1.97002	0.836391	2.03216e-06	26	8.86151
Bacteroidetes_180421	2.32535	1.06232	0.464076	0.894746	2.68905e-06	26	8.85404
Bacteroidetes_234443	2.08708	3.52016	0.0395408	0.996626	0	25.7	8.778
Firmicutes_4481624	2.55554	1.3102	0.435174	0.966788	2.43627e-14	26	8.73659
Bacteroidetes_208479	1.99868	2.18001	0.123502	0.922087	5.25022e-08	26	8.73523
Firmicutes_157453	2.6608	-0.170581	1.10898	0.850591	1.40884e-06	26	8.71012
Firmicutes_188348	2.30197	1.60216	0.299124	0.934044	1.80012e-10	26	8.65852
Firmicutes_843808	1.99731	3.6409	0.0262294	0.996009	0	25	8.56687
Firmicutes_4474760	2.46527	0.817308	0.578708	0.908949	3.32394e-07	26	8.54515
Bacteroidetes_2233608	2.05756	3.66225	0.0314626	0.997326	0	24.4	8.50373
Bacteroidetes_520657	2.06388	3.61319	0.0337356	0.996781	0	25.16	8.4372
Proteobacteria_4454529	2.13505	3.06475	0.0694116	0.986978	0	25.98	8.41548
Bacteroidetes_4476877	2.02165	3.48153	0.033616	0.993244	0	25.8	8.38221
Firmicutes_313593	2.45629	0.389381	0.771406	0.868241	8.40569e-07	26	8.31976
Firmicutes_4458227	1.99234	3.47151	0.0308427	0.992568	0	25.72	8.31025
Firmicutes_4361189	2.45405	1.91553	0.269156	0.979558	8.99281e-16	26	8.2539
Firmicutes_365536	3.66377	-2.35643	2.41249	0.927393	2.31979e-10	26	8.24779
Firmicutes_195651	2.00095	0.739346	0.516117	0.809899	0.000262099	26	8.22064
Firmicutes_4336940	1.9304	2.25869	0.101538	0.906715	2.81421e-08	26	8.19959
Bacteroidetes_4379411	2.19258	3.31398	0.0623831	0.995752	0	25.92	8.15886
Firmicutes_4475758	2.51842	1.95248	0.276586	0.988217	0	26	8.07671
Firmicutes_4466707	2.49171	1.13575	0.470547	0.941853	8.23568e-10	26	8.04209
Firmicutes_4443094	2.21208	2.85243	0.095958	0.989014	0	26	8.00815
Firmicutes_514257	2.06155	2.69685	0.0826521	0.9645	2.26303e-13	26	8.00204
Bacteroidetes_4428119	1.99344	3.80211	0.0219168	0.998385	0	21.16	7.87441
Firmicutes_176690	2.56416	-0.08861	1.05988	0.838145	1.20671e-06	26	7.86151
Firmicutes_147484	2.94765	-0.786165	1.49218	0.865648	2.43819e-07	26	7.82553
Firmicutes_4387453	2.3804	1.15015	0.441116	0.916449	4.37292e-09	26	7.81602
Bacteroidetes_4484010	2.06307	3.68937	0.0311829	0.997151	0	23.12	7.80041
Bacteroidetes_278550	2.04358	3.75974	0.0273144	0.997446	0	22.56	7.80041
Bacteroidetes_760967	2.35903	2.30322	0.185569	0.982608	0	26	7.71894
Firmicutes_4368484	1.9794	3.37036	0.0329122	0.98728	0	25.94	7.71623
Proteobacteria_4441357	2.09581	3.44615	0.0431703	0.993913	0	25.4	7.6945
Firmicutes_182089	2.81096	-0.918523	1.64217	0.834788	0.00039076	26	7.68024
Bacteroidetes_495017	2.37153	2.20427	0.202038	0.981158	4.44089e-18	26	7.6558
Bacteroidetes_291725	2.07059	3.66838	0.0326932	0.997625	0	24.32	7.65037
Firmicutes_592616	2.56068	0.666508	0.65817	0.911067	4.182e-09	26	7.63001
Proteobacteria_4432891	2.62065	1.87098	0.316343	0.986597	0	26	7.60489
Proteobacteria_215097	1.9923	3.28681	0.0373719	0.983885	2.88658e-17	25.96	7.60217
Firmicutes_4359797	2.75087	-0.641245	1.43156	0.839488	8.69394e-06	26	7.58656
Firmicutes_300102	1.86748	3.51168	0.0193207	0.984192	4.36762e-15	25.88	7.58452
Firmicutes_4356307	3.03137	-0.300711	1.15759	0.932613	1.56846e-10	26	7.5628
Firmicutes_176555	1.97228	3.57511	0.0257249	0.992512	0	25.48	7.55126
Firmicutes_4380976	2.05994	3.56938	0.0345978	0.996262	0	25.16	7.54379
Bacteroidetes_175375	2.07695	3.15463	0.0546954	0.987152	0	26	7.50916
Bacteroidetes_4368575	2.50386	1.92715	0.278372	0.985112	5.32907e-17	26	7.46911
Firmicutes_840376	1.87642	2.92288	0.0398906	0.94913	1.77603e-11	26	7.46164
Firmicutes_210262	2.03318	2.92291	0.0619781	0.971585	3.91842e-14	26	7.43856
Bacteroidetes_3862524	2.02002	3.74355	0.0256394	0.997884	0	23.84	7.39647
Fusobacteria_4439398	2.13935	3.46701	0.0479528	0.996442	0	25.7	7.32994
Firmicutes_198511	2.3477	0.71901	0.598313	0.871229	1.48517e-06	26	7.31976
Firmicutes_35786	1.98803	3.55923	0.0274232	0.994087	0	25.26	7.28988
Tenericutes_308760	1.94003	3.04983	0.0409162	0.969026	5.56765e-12	25.98	7.19009
Firmicutes_3195723	2.62474	0.713827	0.648525	0.923761	1.0536e-09	26	7.18941
Firmicutes_4428676	2.81296	-0.199419	1.11485	0.889846	6.39454e-08	26	7.12016
Firmicutes_347690	2.3609	1.02768	0.475389	0.903547	2.40421e-07	26	7.00747
Firmicutes_4468333	2.04624	3.51902	0.0346711	0.99259	0	23.66	6.98167
Firmicutes_4393565	2.58523	1.7338	0.336519	0.979723	4.17444e-16	26	6.9776
Firmicutes_4474485	2.1582	3.1842	0.0644924	0.993354	0	25.94	6.9742
Firmicutes_4349261	2.31539	2.02828	0.216337	0.966758	7.30882e-14	26	6.95655
Firmicutes_177037	2.93267	-0.214715	1.11582	0.925931	7.67918e-10	26	6.9036
Firmicutes_4469302	2.67959	1.42032	0.430508	0.978796	6.88338e-16	26	6.89341
Firmicutes_178242	2.24989	1.87722	0.230118	0.937203	3.47218e-10	26	6.87508
Firmicutes_189292	2.31365	2.19236	0.191833	0.970377	2.95164e-14	26	6.85472
Firmicutes_4458306	2.77972	1.04247	0.557638	0.97821	1.66533e-15	26	6.84182
Bacteroidetes_2686372	2.03395	3.76836	0.0261869	0.998157	0	21.46	6.81806
Proteobacteria_4471067	2.00491	3.73765	0.0242982	0.996899	0	23.32	6.80041
Firmicutes_319680	2.33833	0.696853	0.602961	0.858129	1.58793e-06	26	6.79769
Actinobacteria_1000986	2.47673	1.91068	0.275697	0.97999	6.43929e-17	26	6.79769
Firmicutes_293076	2.0262	3.64884	0.0288341	0.996858	0	24.84	6.78479
Bacteroidetes_2599028	2.82614	1.00137	0.577731	0.989066	0	26	6.75492
Firmicutes_495007	2.34848	2.44635	0.163748	0.984998	0	26	6.72098
Firmicutes_4470260	2.31312	2.65648	0.132802	0.989394	0	26	6.6721
Firmicutes_4408801	2.08046	1.32003	0.317238	0.865818	1.07944e-05	26	6.60828
Firmicutes_173851	2.084	2.48051	0.107555	0.950679	6.81529e-12	26	6.60692
Tenericutes_235065	1.99325	3.70208	0.0242131	0.996958	0	24.32	6.55329
Bacteroidetes_326626	2.1583	3.26666	0.0598365	0.994559	0	25.9	6.51731
Bacteroidetes_4323124	2.30519	1.8929	0.239901	0.948716	2.56513e-11	26	6.51527
Firmicutes_311947	2.36832	1.83187	0.26662	0.955059	5.49485e-13	26	6.50713
Proteobacteria_4454068	2.18567	3.25024	0.0648081	0.994449	0	25.98	6.50645
Tenericutes_555400	2.18697	2.20975	0.159929	0.943573	5.53136e-11	26	6.48133
Firmicutes_4347520	2.71446	0.959613	0.572295	0.969378	5.29243e-14	26	6.45214
Firmicutes_4254528	2.19287	0.99044	0.447566	0.862574	3.84972e-07	26	6.43177
Firmicutes_187780	1.97681	3.07033	0.0448534	0.975417	4.54969e-15	26	6.41208
Bacteroidetes_4331760	2.57527	0.708966	0.640775	0.919772	1.17085e-09	26	6.38697
Firmicutes_183650	2.20191	2.48345	0.128981	0.972501	4.83391e-15	26	6.35098
Firmicutes_4397098	2.49984	1.81078	0.301166	0.974566	1.28564e-15	26	6.34963
Firmicutes_212532	2.77026	0.354541	0.81805	0.961257	7.44447e-13	26	6.33876
Firmicutes_4380450	2.55313	1.20644	0.462748	0.947086	1.38294e-11	26	6.33809
Bacteroidetes_522582	1.98467	3.69183	0.0237244	0.996255	0	24.48	6.32315
Bacteroidetes_3989856	3.12223	-0.586074	1.3131	0.931698	6.40815e-09	26	6.30957
Proteobacteria_4407939	3.19987	-0.377048	1.18411	0.946432	5.70279e-12	26	6.30007
Proteobacteria_4479405	1.93315	1.28028	0.281823	0.829004	1.12094e-05	26	6.27495
Firmicutes_4396292	2.07842	1.13371	0.371193	0.848943	8.84853e-06	26	6.27223
Firmicutes_4410097	2.09702	3.02593	0.0647897	0.984785	8.88178e-18	26	6.25051
Firmicutes_177697	2.59345	-0.111096	1.06549	0.831811	1.13847e-05	26	6.21045
Firmicutes_4407979	2.08422	3.46678	0.0411553	0.995054	0	25.7	6.12424
Firmicutes_192015	3.15232	-0.864216	1.4874	0.890352	7.19318e-08	26	6.10387
Firmicutes_162491	2.18306	2.31029	0.144647	0.959067	1.2295e-11	26	6.10183
Bacteroidetes_4451152	2.08581	2.92536	0.0712613	0.976741	4.17444e-16	26	6.05227
Bacteroidetes_4474759	2.02588	3.82168	0.0242466	0.998411	0	20.68	6.03734
Tenericutes_4388068	2.02721	3.13427	0.0483152	0.983167	3.10862e-17	25.94	6.03598
Firmicutes_36892	2.20159	1.8537	0.220688	0.92344	8.75358e-10	26	6.02308
Firmicutes_839282	2.05784	3.52432	0.0358898	0.995399	0	25.62	6.00272
Firmicutes_177828	2.20559	1.7376	0.24424	0.90766	8.27496e-09	26	5.99661
Firmicutes_540055	2.29921	1.88261	0.237994	0.947695	1.27933e-11	26	5.95519
Proteobacteria_4438565	2.06852	3.67015	0.0324356	0.997132	0	24.46	5.94229
Bacteroidetes_1044419	2.01939	3.84406	0.0231204	0.998565	0	20.42	5.93007
Tenericutes_185593	2.04718	3.52869	0.0348249	0.995212	0	25.58	5.92872
Firmicutes_174489	2.34808	0.652715	0.622981	0.862839	3.33819e-05	26	5.91446
Bacteroidetes_214031	2.2904	1.69048	0.277162	0.926286	1.33069e-09	26	5.91378
Firmicutes_4429335	2.41329	1.99448	0.245604	0.974308	4.38538e-15	26	5.87916
Firmicutes_4435400	2.3769	1.2379	0.412908	0.919731	1.18075e-08	26	5.84793
Tenericutes_569244	2.16282	2.82264	0.0889566	0.983444	0	25.98	5.81331
Firmicutes_2686369	3.01663	-0.241592	1.12499	0.91375	2.21953e-09	26	5.68635
Firmicutes_918313	2.05565	2.98944	0.0609647	0.977359	1.14131e-15	26	5.65105
Firmicutes_183715	2.02518	3.1052	0.0497103	0.982556	1.17684e-16	26	5.62254
Proteobacteria_211720	2.00392	3.20545	0.0422913	0.984424	1.55431e-17	25.98	5.57705
Bacteroidetes_4434294	2.06066	3.54834	0.035475	0.995817	0	25.42	5.5241
Firmicutes_4459708	2.45337	1.72606	0.307652	0.96314	2.1807e-13	26	5.51052
Firmicutes_2035344	3.06666	-0.432698	1.22663	0.910618	1.78098e-09	26	5.49423
Firmicutes_172163	1.97444	3.43102	0.0299782	0.991388	0	25.74	5.49151
Firmicutes_327218	1.82514	1.59878	0.169435	0.852954	7.27449e-06	26	5.40326
Firmicutes_4441615	2.57006	1.25209	0.451659	0.944803	9.44015e-12	26	5.3761
Proteobacteria_163857	2.04428	3.76076	0.0274187	0.997707	0	22.34	5.37475
Firmicutes_189524	2.70782	0.109502	0.933904	0.874941	5.73328e-07	26	5.35981
Bacteroidetes_4450198	2.85749	-1.07922	1.75125	0.764328	0.000344494	26	5.33401
Firmicutes_368486	2.60726	1.63787	0.361363	0.975403	5.21805e-16	26	5.32994
Firmicutes_4381635	1.95132	3.55917	0.024074	0.993205	0	25.6	5.32654
Firmicutes_4462599	2.29372	1.33122	0.363114	0.904716	4.01194e-08	26	5.31297
Firmicutes_175630	2.71384	0.371892	0.8037	0.89547	6.74138e-08	26	5.31161
Firmicutes_197624	2.22603	0.40591	0.720835	0.80838	4.84772e-05	26	5.22946
Bacteroidetes_107044	2.30748	2.30001	0.173892	0.974251	1.0576e-14	26	5.22064
Firmicutes_544996	2.18928	1.98576	0.193735	0.932638	9.76497e-10	26	5.21928
Firmicutes_360890	2.42916	1.44127	0.367679	0.927832	9.81952e-10	26	5.16022
Firmicutes_828333	2.25462	0.809031	0.531793	0.849283	4.09681e-05	26	5.1222
Firmicutes_4476950	2.42363	2.03269	0.241437	0.969781	3.69038e-15	26	5.11813
Bacteroidetes_4307094	2.04964	3.73154	0.0286691	0.99751	0	23.3	5.11405
Firmicutes_2676432	2.07062	3.38204	0.0428147	0.993356	0	25.9	5.04277
Tenericutes_259677	2.03175	3.49905	0.0338918	0.994451	0	25.38	5.0095
Firmicutes_193667	2.49137	-0.0525604	1.02088	0.808658	0.000199315	26	4.98846
Firmicutes_187882	2.05514	1.89608	0.173875	0.911706	1.51635e-08	26	4.98778
Firmicutes_301765	2.69124	0.912943	0.583817	0.938231	8.23123e-11	26	4.98099
Firmicutes_539581	2.30745	2.14676	0.195313	0.962806	8.11402e-13	26	4.97284
Firmicutes_180572	3.11076	0.382246	0.833635	0.959519	2.19531e-13	26	4.96741
Firmicutes_188079	2.7565	0.698347	0.671316	0.933808	7.16017e-11	26	4.9484
Firmicutes_291266	2.58844	1.60206	0.365086	0.978017	3.79918e-15	26	4.94569
Firmicutes_1945397	1.70417	3.00239	0.0168796	0.937523	3.54089e-09	26	4.91582
Firmicutes_571642	2.19992	1.52936	0.285353	0.89054	1.35805e-07	26	4.89545
Proteobacteria_2892743	1.96922	3.13526	0.0404502	0.977285	5.72875e-15	26	4.86354
Actinobacteria_177478	2.48754	1.20526	0.447258	0.925544	5.54189e-10	26	4.85947
Firmicutes_572751	2.06811	3.56766	0.0356413	0.995723	0	25.08	4.84589
Firmicutes_177581	2.38049	0.403856	0.745914	0.832284	1.47991e-05	26	4.84386
Firmicutes_110192	2.55328	1.20349	0.462637	0.93974	1.96162e-11	26	4.80516
Firmicutes_175612	2.59106	1.65768	0.354262	0.96511	5.48213e-13	26	4.79362
Actinobacteria_4393532	2.68121	0.961086	0.565193	0.94009	1.40831e-11	26	4.78955
Firmicutes_181422	3.3652	-0.106628	1.04379	0.96031	9.00124e-14	26	4.778
Cyanobacteria_2134134	2.02443	3.31214	0.0400543	0.989314	0	25.94	4.75356
Firmicutes_364289	1.9045	2.32885	0.0827295	0.910044	1.25448e-08	26	4.74202
Firmicutes_793109	2.27006	2.56478	0.133684	0.978686	3.9968e-17	26	4.73523
Firmicutes_4377149	1.88782	2.00133	0.114433	0.890356	1.06305e-06	26	4.73388
Tenericutes_229874	2.07928	3.18101	0.0531538	0.985353	0	25.92	4.71147
Firmicutes_4440624	2.63837	1.45543	0.411598	0.977195	1.70131e-14	26	4.68296
Tenericutes_230132	1.88017	3.47994	0.0195629	0.986908	1.33227e-17	25.74	4.66802
Firmicutes_20421	2.02292	3.80392	0.024386	0.998074	0	21.96	4.66802
Firmicutes_4429608	2.8797	1.0807	0.562596	0.974021	6.35048e-16	26	4.66056
Firmicutes_177342	2.47272	0.589246	0.669464	0.86436	2.97831e-06	26	4.65377
Firmicutes_4479989	3.41654	-0.465639	1.21081	0.96918	1.27343e-14	26	4.64698
Firmicutes_181174	2.6409	0.38958	0.785432	0.881259	6.58368e-08	26	4.63747
Firmicutes_2530636	2.03135	3.57909	0.0314822	0.995453	0	25.36	4.60217
Firmicutes_230232	2.91989	-0.00998078	1.00127	0.885664	4.1706e-07	26	4.59538
Firmicutes_4446669	2.32217	2.13451	0.202961	0.95834	1.60381e-13	26	4.57773
Bacteroidetes_524661	2.17398	3.3975	0.0555092	0.994993	0	25.84	4.52546
Proteobacteria_3330580	2.01717	3.83427	0.0231622	0.99835	2.22045e-18	20.26	4.51595
Firmicutes_168289	2.32735	2.05985	0.214281	0.956976	6.0606e-13	26	4.51188
Firmicutes_197698	1.99098	2.17342	0.118849	0.912177	1.02579e-08	26	4.51188
Bacteroidetes_1652947	2.03159	3.8207	0.0246959	0.998097	0	21.58	4.50034
Firmicutes_4354486	2.21111	1.11017	0.407695	0.859759	8.57146e-07	26	4.49151
Firmicutes_4412541	2.25934	3.00654	0.0923296	0.990995	0	26	4.47318
Firmicutes_4451906	2.75823	0.576006	0.718592	0.913646	1.1933e-08	26	4.44739
Proteobacteria_4388385	2.03862	3.61254	0.0309693	0.996114	0	25.08	4.42498
Firmicutes_178447	3.47689	-0.576694	1.25761	0.951611	1.26356e-12	26	4.4243
Bacteroidetes_4393745	2.36757	-0.157854	1.09436	0.754592	0.00126181	26	4.4148
Firmicutes_4328910	2.90881	0.849108	0.640925	0.971073	1.63336e-14	26	4.40937
Bacteroidetes_4430581	2.21688	1.85782	0.221738	0.921642	4.89304e-09	26	4.37678
Bacteroidetes_4335293	2.11009	3.53362	0.0415831	0.995549	0	25.46	4.36117
Proteobacteria_111135	2.25124	2.97657	0.0928505	0.990863	0	26	4.35234
Firmicutes_522433	2.1965	2.50009	0.126585	0.967637	3.06111e-14	26	4.33198
Actinobacteria_328472	2.47029	2.18182	0.227536	0.977377	8.88178e-17	26	4.31297
Firmicutes_4481195	2.48063	0.258497	0.834232	0.820649	1.97998e-05	26	4.29464
Proteobacteria_4479467	2.17422	3.40007	0.0554008	0.99384	0	25.86	4.29464
Bacteroidetes_4476186	2.02268	3.79316	0.0245839	0.998018	0	22.6	4.28853
Firmicutes_174911	2.21678	1.84266	0.224697	0.928543	7.11368e-10	26	4.28106
Firmicutes_163494	2.61706	0.448339	0.752467	0.868532	1.06917e-06	26	4.26273
Firmicutes_1667433	2.60825	1.42943	0.41219	0.949825	8.53629e-12	26	4.24847
Firmicutes_195950	2.21297	1.85808	0.21929	0.9235	4.77565e-10	26	4.24847
Bacteroidetes_198185	3.62112	-1.48492	1.74763	0.890115	9.70243e-08	26	4.24304
Proteobacteria_46026	2.01883	2.69301	0.0741865	0.959541	6.33193e-13	26	4.24236
Firmicutes_168071	2.28896	0.861734	0.513824	0.850825	2.8271e-05	26	4.24168
Firmicutes_531928	2.07168	3.64286	0.0335777	0.99628	0	24.86	4.18262
Firmicutes_2506486	2.32857	0.54616	0.661246	0.837107	3.25395e-06	26	4.15954
Proteobacteria_4301099	2.01231	3.62478	0.0281571	0.99613	0	25.14	4.15275
Firmicutes_4431558	2.84181	0.418866	0.794325	0.915373	1.25558e-08	26	4.14121
Firmicutes_182036	2.66434	0.538824	0.721248	0.888659	3.019e-08	26	4.13578
Bacteroidetes_874462	2.30444	2.49675	0.148611	0.976801	1.3034e-15	26	4.1351
Firmicutes_174862	2.46563	0.257956	0.830958	0.826802	7.47662e-06	26	4.12152
Actinobacteria_4376828	2.57753	1.70235	0.339889	0.977398	3.25739e-15	26	4.10998
Bacteroidetes_4361727	2.92473	-0.851492	1.53018	0.783518	5.60632e-05	26	4.09708
Bacteroidetes_150412	2.17808	2.46057	0.126002	0.960659	1.54836e-13	26	4.04752
Firmicutes_3973322	2.26406	1.26793	0.369595	0.868102	4.56161e-07	26	4.00543
Firmicutes_174924	2.47147	0.944459	0.526144	0.887792	1.15153e-07	26	4.00136
Bacteroidetes_269937	2.0079	3.77497	0.0237545	0.997873	0	23.06	3.98167
Bacteroidetes_349786	2.78864	0.423995	0.7853	0.905282	2.0883e-08	26	3.96877
Proteobacteria_113542	2.23019	2.20311	0.169198	0.95443	3.66669e-12	26	3.95316
Firmicutes_176346	2.70446	0.372057	0.80053	0.885503	1.66611e-07	26	3.89817
Bacteroidetes_3963289	3.0392	-0.756135	1.42852	0.816103	1.34588e-05	26	3.88798
Firmicutes_177230	2.43774	0.971083	0.509588	0.87402	7.00261e-07	26	3.87984
Proteobacteria_354574	1.94554	2.71611	0.0600228	0.949114	4.68564e-11	25.98	3.8778
Actinobacteria_932077	2.50473	1.80858	0.300575	0.979578	1.03987e-12	26	3.8554
Firmicutes_4442508	2.66828	1.4931	0.408899	0.958697	1.08127e-12	26	3.85268
Proteobacteria_4454531	2.69164	1.07065	0.531051	0.939261	7.83706e-11	26	3.81331
Firmicutes_4415390	2.27008	2.42984	0.148932	0.973529	7.645e-15	26	3.7909
Firmicutes_4309760	2.06343	3.10936	0.0546477	0.981761	8.65974e-17	26	3.76782
Bacteroidetes_134265	2.19095	2.77903	0.0983219	0.981578	8.21565e-17	26	3.76578
Actinobacteria_173965	3.00075	0.182597	0.90932	0.901172	1.5758e-08	26	3.76035
Firmicutes_619817	2.34587	1.72283	0.280654	0.933534	1.24617e-10	26	3.73795
Bacteroidetes_357305	2.00931	3.82425	0.0226759	0.998058	0	20.62	3.72709
Firmicutes_317677	2.03978	1.45815	0.260116	0.86146	4.66634e-06	26	3.70944
Firmicutes_187212	2.42754	0.24868	0.833809	0.811827	0.000268138	26	3.66802
Actinobacteria_365385	2.08569	3.00409	0.0639991	0.981419	3.77476e-17	25.98	3.66667
Firmicutes_1146784	2.12001	3.22046	0.0569759	0.989784	0	25.9	3.60081
Firmicutes_4473883	2.07747	3.53274	0.0379216	0.995263	0	25.64	3.5981
Firmicutes_198133	1.89077	3.39975	0.0224818	0.982397	3.19744e-16	25.44	3.59335
Firmicutes_4483006	2.07374	3.497	0.0386572	0.99355	0	25.26	3.57705
Firmicutes_851821	2.23956	2.73873	0.110775	0.980627	1.79856e-16	26	3.57298
Firmicutes_4472551	2.18042	2.96762	0.0817031	0.985094	0	26	3.55465
Firmicutes_688923	2.47729	0.867048	0.555058	0.880308	5.69201e-07	26	3.55329
Firmicutes_4288931	1.63218	2.96859	0.014719	0.920684	1.76007e-07	26	3.5499
Actinobacteria_942245	2.2079	3.13849	0.0748638	0.990812	0	25.98	3.5336
Firmicutes_178712	2.35601	2.07733	0.218466	0.956469	9.8257e-13	26	3.53293
Firmicutes_188127	2.24224	0.761322	0.542452	0.818131	6.06199e-05	26	3.52071
Firmicutes_842193	1.97201	2.9803	0.0479107	0.969271	2.3783e-13	26	3.50916
Firmicutes_195166	2.36498	2.57926	0.151835	0.983387	0	26	3.50238
Firmicutes_4296763	1.93903	3.53087	0.0235285	0.991836	0	25.06	3.48948
Firmicutes_183030	2.43669	1.9731	0.254117	0.963927	4.17222e-14	26	3.46843
Bacteroidetes_851668	2.1716	2.99106	0.0787207	0.984587	0	26	3.46164
Firmicutes_3530697	2.67653	0.840113	0.604273	0.903843	9.02086e-09	26	3.4535
Firmicutes_339685	1.9291	3.46065	0.0243221	0.986159	7.84484e-15	23.62	3.44874
Firmicutes_197179	2.02746	1.99718	0.149881	0.906014	5.47933e-09	26	3.44807
Actinobacteria_4426298	2.35971	2.66013	0.14201	0.985812	2.22045e-18	26	3.44399
Firmicutes_322505	2.1911	2.28644	0.149239	0.948739	3.68648e-11	26	3.43177
Bacteroidetes_197517	1.92083	3.17052	0.0329443	0.971384	5.43698e-13	25.94	3.42498
Firmicutes_2688035	2.35506	0.800237	0.550835	0.853698	8.42561e-06	26	3.41208
Firmicutes_350121	2.68932	1.86059	0.332917	0.970774	1.01741e-14	26	3.4053
Firmicutes_4425368	2.15347	3.47444	0.0493974	0.994653	0	25.76	3.40462
Firmicutes_3028273	2.38026	2.23366	0.198717	0.973452	9.08162e-16	26	3.39783
Firmicutes_4332078	2.33539	1.55657	0.313654	0.916178	1.21992e-09	26	3.36185
Firmicutes_134786	2.36258	2.47384	0.163677	0.97618	1.72529e-15	26	3.35642
Firmicutes_196307	1.97565	2.09445	0.123093	0.912458	3.19491e-08	26	3.34963
Proteobacteria_1028632	2.55027	0.802476	0.593746	0.878018	3.25704e-08	26	3.34352
Firmicutes_2119695	2.82725	0.436952	0.782675	0.888551	1.57214e-07	26	3.31704
Firmicutes_182044	1.87212	2.25531	0.0818045	0.893613	1.77149e-07	26	3.28445
Firmicutes_315223	2.43315	2.02115	0.244376	0.969189	1.91025e-14	26	3.26612
Firmicutes_130763	2.2322	1.5625	0.284394	0.898395	3.42769e-07	26	3.26409
Proteobacteria_4392183	1.71603	1.45704	0.155952	0.815091	8.81358e-06	26	3.25187
Proteobacteria_4391009	2.03293	3.10998	0.0503702	0.980655	2.02061e-15	25.98	3.23014
Firmicutes_587933	2.17018	3.02393	0.076247	0.984448	1.33227e-17	26	3.23014
Tenericutes_178759	1.98995	3.47729	0.030039	0.992297	0	25.3	3.22064
Bacteroidetes_296082	2.02472	3.82475	0.0240268	0.997709	4.44089e-18	20.54	3.19959
Firmicutes_177618	2.82119	0.313129	0.835631	0.880784	4.84666e-08	26	3.19756
Firmicutes_4326080	2.73984	0.551534	0.724449	0.871916	4.75528e-07	26	3.18873
Firmicutes_519545	2.00739	3.44805	0.0331688	0.989287	0	25.26	3.18466
Firmicutes_274087	2.0326	3.79349	0.0254253	0.997466	1.9984e-17	21.06	3.18126
Actinobacteria_4402537	2.24712	2.16777	0.178299	0.947682	2.11673e-12	26	3.1799
Bacteroidetes_535549	2.38953	1.23843	0.412328	0.895437	4.54926e-08	26	3.16158
Firmicutes_4060501	1.97408	2.05345	0.126214	0.906253	1.18059e-08	26	3.15003
Firmicutes_4094259	2.2238	1.22235	0.373477	0.856035	4.15685e-06	26	3.14732
Firmicutes_54563	2.33926	1.9815	0.229085	0.946908	6.66754e-12	26	3.14664
Firmicutes_4454025	2.50289	1.71004	0.321425	0.94928	7.20864e-12	26	3.13306
Firmicutes_36378	2.00728	3.4761	0.0320947	0.990965	0	25.46	3.12152
Bacteroidetes_290455	2.02914	3.82564	0.0243736	0.997894	0	21.18	3.11948
Firmicutes_312882	3.0014	0.243771	0.880388	0.904667	8.41065e-09	26	3.0964
Bacteroidetes_294909	1.99037	3.73986	0.0230151	0.996903	0	23.14	3.09097
Firmicutes_180771	1.94513	2.87984	0.0495898	0.964418	2.01179e-13	26	3.09097
Firmicutes_177032	2.57341	1.41339	0.407439	0.935641	9.35857e-11	26	3.08215
Tenericutes_921020	1.99199	3.51335	0.0292414	0.991432	0	25.06	3.08079
Firmicutes_179601	1.85047	2.74403	0.0431103	0.944226	6.54849e-11	26	3.03259
Firmicutes_176104	2.35954	1.43629	0.348583	0.891518	3.23415e-08	26	3.02987
Firmicutes_25695	2.1306	2.8727	0.0802702	0.975701	3.15303e-16	26	3.00475
Firmicutes_352014	2.25809	2.70074	0.117661	0.978341	4.39648e-16	26	2.97352
Firmicutes_3756485	2.47867	1.04909	0.490166	0.883116	7.43383e-08	26	2.95519
Firmicutes_181204	2.40276	0.701565	0.600994	0.839475	3.03109e-06	26	2.95316
Firmicutes_336265	2.06106	2.9895	0.0613801	0.974691	8.75522e-15	25.98	2.95248
Firmicutes_2066056	2.53553	1.97796	0.276134	0.968467	3.48934e-13	26	2.95112
Bacteroidetes_211706	2.96867	-0.383734	1.19947	0.820409	3.59242e-06	26	2.95044
Firmicutes_182011	1.94113	3.45803	0.0255498	0.988577	8.88178e-18	25.22	2.94229
Firmicutes_4469924	2.1155	3.35165	0.0499343	0.992324	0	25.9	2.92261
Firmicutes_178799	2.1189	3.08805	0.0638644	0.986946	0	25.98	2.89206
Firmicutes_787049	2.59097	2.11331	0.264955	0.981689	0	26	2.89002
Firmicutes_3805726	2.29786	2.38464	0.160394	0.965731	2.94742e-14	26	2.88323
Firmicutes_4437748	1.97314	3.40982	0.0304367	0.988126	8.88178e-18	25.44	2.86762
Firmicutes_190453	2.07686	2.61683	0.0897141	0.956261	2.42972e-12	26	2.84114
Synergistetes_3121406	2.16469	3.00679	0.0763217	0.983255	0	25.98	2.81942
Firmicutes_227697	2.07802	3.50205	0.0390813	0.994513	0	25.52	2.81534
Proteobacteria_360508	2.10218	2.13923	0.146328	0.922208	6.133e-09	26	2.79294
Firmicutes_4477479	2.36726	1.44493	0.348102	0.908964	7.55671e-08	26	2.7909
Cyanobacteria_4303423	2.02416	3.76741	0.0253199	0.996875	0	21.62	2.77936
Proteobacteria_4380886	2.01094	1.26463	0.291649	0.852655	6.23922e-06	26	2.77665
Firmicutes_188457	1.94631	3.14065	0.0371699	0.975058	3.48166e-15	25.94	2.77461
Firmicutes_157966	2.4863	0.761913	0.593943	0.853616	7.01286e-07	26	2.76918
Firmicutes_2835813	2.34886	1.95175	0.236609	0.939395	4.24518e-11	26	2.76918
Firmicutes_333949	2.5465	0.841287	0.576482	0.878595	6.99165e-08	26	2.759
Firmicutes_175145	2.34191	0.713825	0.583589	0.819333	7.53956e-06	26	2.75628
Firmicutes_1100471	2.30579	2.4619	0.152657	0.967971	7.54929e-14	26	2.75356
Firmicutes_179864	2.45027	1.88624	0.273001	0.951267	2.69735e-12	26	2.72234
Bacteroidetes_1066814	2.02971	3.39644	0.0370704	0.990042	0	25.2	2.68839
Actinobacteria_1062356	2.31286	2.84606	0.114687	0.987782	0	26	2.67821
Firmicutes_172857	2.46556	1.25418	0.423949	0.901452	7.45323e-08	26	2.67753
Firmicutes_4315396	2.16492	2.78765	0.0922175	0.973516	1.05027e-15	25.98	2.66735
Firmicutes_358712	2.09446	2.95871	0.068115	0.977052	1.01519e-14	26	2.66667
Bacteroidetes_198869	2.01347	3.81949	0.0231735	0.997878	0	21	2.6592
Firmicutes_303269	1.95197	3.55358	0.0242503	0.992448	0	24.9	2.64019
Firmicutes_176077	2.15488	1.09723	0.387266	0.831352	1.86474e-05	26	2.63069
Firmicutes_3673770	2.14772	2.70682	0.096015	0.968002	1.68456e-13	26	2.61982
Proteobacteria_9727	2.10297	1.29227	0.312587	0.851709	4.64736e-06	26	2.61847
Firmicutes_332241	1.93744	3.22032	0.0333966	0.978617	9.03722e-16	25.86	2.61643
Firmicutes_183829	1.87864	3.52826	0.0184405	0.987567	3.33067e-17	25.28	2.61643
Bacteroidetes_2058521	2.32037	3.03005	0.100992	0.991273	0	26	2.60964
Firmicutes_192983	2.42725	0.750822	0.587578	0.841393	1.0676e-06	26	2.60964
Actinobacteria_4397092	2.14942	2.39856	0.125935	0.948229	1.34338e-11	26	2.60828
Firmicutes_358030	1.93499	2.92252	0.0454756	0.963388	4.40007e-12	25.98	2.60625
Firmicutes_4357657	2.0198	3.77983	0.0246524	0.99713	2.22045e-18	21.38	2.59063
Lentisphaerae_4329575	2.20926	2.61758	0.116024	0.965511	9.43978e-14	26	2.58995
Proteobacteria_4474255	2.4416	1.57081	0.336474	0.919755	7.49336e-09	26	2.58113
Firmicutes_533847	1.99161	3.44825	0.0310438	0.990863	0	25.24	2.57977
Firmicutes_4438608	2.03287	3.5779	0.0314701	0.994326	0	24.66	2.57502
Firmicutes_4458700	2.3752	2.22932	0.198347	0.966656	1.88269e-13	26	2.5723
Firmicutes_1599042	2.95652	0.978238	0.605392	0.947782	1.87351e-12	26	2.55804
Firmicutes_839964	2.40664	1.90456	0.25874	0.948442	3.37412e-11	26	2.55329
Firmicutes_178018	2.26612	1.81669	0.239518	0.918734	9.16658e-09	26	2.55329
Proteobacteria_246717	2.24355	2.89974	0.0976371	0.984343	4.44089e-18	26	2.54718
Firmicutes_2442706	2.94858	0.399928	0.807596	0.892051	3.66446e-08	26	2.54582
Firmicutes_175560	3.19129	0.980043	0.638044	0.968103	9.2526e-15	26	2.54243
Firmicutes_4358322	2.02965	2.83517	0.0654573	0.963034	9.65861e-13	26	2.537
Tenericutes_4308127	1.97024	3.69786	0.0223041	0.996121	0	23.34	2.53496
Firmicutes_355187	1.97401	3.71289	0.0222614	0.99624	0	22.96	2.5241
Firmicutes_4378332	2.01796	3.43362	0.0344034	0.990495	0	25.18	2.51731
Firmicutes_187126	2.26383	1.07378	0.425655	0.85001	3.63416e-06	26	2.50713
Firmicutes_157772	2.6837	1.16021	0.50056	0.918522	1.14894e-09	26	2.50577
Firmicutes_195619	2.12301	1.34544	0.302607	0.872135	2.30668e-07	26	2.49423
Firmicutes_4469032	2.14459	3.25874	0.058447	0.990029	0	25.86	2.49151
Proteobacteria_4464858	2.01872	3.80643	0.0239247	0.997509	0	20.94	2.47862
Bacteroidetes_311950	2.92538	0.965409	0.602962	0.927689	4.74467e-10	26	2.46232
Firmicutes_525215	2.41739	2.87	0.132121	0.989621	0	26	2.45757
Firmicutes_4460847	2.49391	1.82685	0.29447	0.948156	5.90945e-12	26	2.45418
Firmicutes_133719	2.09502	2.19499	0.137347	0.921446	1.80435e-09	26	2.44671
Firmicutes_4070490	1.97308	3.74646	0.0213649	0.996839	0	22.2	2.44671
Firmicutes_4413619	2.01845	3.03952	0.0515903	0.975701	1.73639e-14	26	2.4372
Firmicutes_147100	2.26026	2.00134	0.205864	0.932619	1.12841e-10	26	2.43585
Bacteroidetes_188735	3.25196	-0.20278	1.0849	0.86558	1.13448e-07	26	2.43041
Firmicutes_4336939	1.94077	2.68483	0.0608876	0.954018	4.45641e-12	26	2.41005
Firmicutes_181871	2.36495	2.7504	0.13349	0.985988	0	26	2.40937
Firmicutes_148279	2.57983	1.35562	0.422597	0.915532	2.74276e-09	26	2.39851
Firmicutes_4460021	2.41066	2.07465	0.230149	0.961569	1.48972e-13	26	2.39851
Firmicutes_4370941	2.21493	1.52892	0.284999	0.88152	2.87132e-07	26	2.39579
Bacteroidetes_113069	2.02394	3.7258	0.0263604	0.996238	0	23.02	2.39104
Firmicutes_3841096	2.20454	2.09463	0.177363	0.923444	7.52774e-10	26	2.37203
Firmicutes_181756	2.26893	1.03143	0.441469	0.846089	5.40701e-06	26	2.315
Proteobacteria_4353264	2.02337	3.76821	0.025232	0.997337	0	22.48	2.30957
Firmicutes_186968	2.03999	3.51544	0.0342055	0.992615	0	25.4	2.30686
Firmicutes_561607	1.98256	2.50305	0.0811071	0.947191	1.75968e-10	26	2.29735
Firmicutes_174045	2.16362	2.23762	0.148033	0.937341	2.17144e-11	26	2.29464
Firmicutes_19611	2.50097	1.77799	0.305569	0.941666	3.54597e-11	26	2.27359
Bacteroidetes_846798	2.09435	2.8045	0.0779525	0.97109	1.31006e-15	26	2.26341
Proteobacteria_4326874	2.0043	3.59593	0.0280504	0.994702	0	24.76	2.24304
Firmicutes_389371	2.46411	1.45154	0.370101	0.91014	1.10012e-08	26	2.2315
Firmicutes_199710	2.03595	1.70142	0.196956	0.88088	8.37523e-07	26	2.22539
Firmicutes_300620	2.17493	2.12245	0.165957	0.933062	5.0588e-10	26	2.2186
Firmicutes_4471245	2.44595	2.34875	0.197632	0.966501	1.60671e-13	26	2.21521
Firmicutes_114000	1.94749	3.62129	0.0220887	0.993392	0	23.5	2.21113
Actinobacteria_813479	2.25518	1.79585	0.240095	0.911899	1.98598e-08	26	2.2091
Proteobacteria_3514716	2.06831	3.56607	0.0355988	0.993437	0	24.62	2.20706
Firmicutes_3855938	2.11446	3.02095	0.0672339	0.980381	1.55431e-16	25.94	2.19959
Bacteroidetes_925131	2.0111	3.82035	0.0229414	0.997704	3.55271e-17	20.16	2.19484
Firmicutes_177941	2.5161	1.40387	0.39481	0.916368	1.70108e-09	26	2.19145
Firmicutes_4379449	2.04757	2.18039	0.127295	0.919537	2.36187e-09	26	2.18737
Firmicutes_199694	2.33455	0.981286	0.475764	0.850027	5.02141e-06	26	2.18398
Proteobacteria_678813	1.85983	3.08904	0.0280961	0.969308	3.11302e-13	25.98	2.18194
Bacteroidetes_495394	2.1981	3.01737	0.0809604	0.985222	4.44089e-18	26	2.18058
Firmicutes_4415616	2.00231	3.14257	0.0442974	0.977186	3.71703e-15	25.92	2.17583
Firmicutes_4349519	2.15727	3.09741	0.0691829	0.986034	0	25.98	2.16565
Firmicutes_158771	1.95294	3.67337	0.0212754	0.994735	0	24.46	2.15479
Firmicutes_179663	2.01521	1.24638	0.293458	0.813484	1.13271e-05	26	2.14732
Firmicutes_175148	2.57783	1.16393	0.476014	0.888858	1.372e-07	26	2.14596
Firmicutes_4342104	2.60061	1.31246	0.438572	0.908317	6.16096e-09	26	2.11813
Firmicutes_306299	2.75267	1.0251	0.55356	0.905226	3.94364e-08	26	2.0835
Firmicutes_14280	2.25561	2.71611	0.115565	0.975109	6.54587e-15	26	2.08011
Firmicutes_193763	2.51715	1.24552	0.43817	0.877458	2.26182e-07	26	2.07943
Firmicutes_3696710	2.2057	2.95681	0.0867789	0.984262	4.44089e-18	26	2.07875
Firmicutes_196742	2.31874	2.0845	0.206735	0.939117	1.08023e-09	26	2.074
Firmicutes_292387	2.19802	3.06103	0.0777915	0.987256	0	25.96	2.07332
Firmicutes_4431545	2.27909	1.28773	0.363903	0.863128	2.06118e-06	26	2.06789
Firmicutes_19080	1.98896	3.7701	0.0222506	0.99736	0	22.02	2.06517
Firmicutes_4438999	2.31727	2.72847	0.126319	0.978927	1.33227e-16	26	2.06246
Firmicutes_4447176	2.30705	2.3117	0.17162	0.953053	1.50385e-11	26	2.06246
Firmicutes_187267	1.93396	2.72039	0.056075	0.95116	5.81956e-12	26	2.05838
Firmicutes_4341816	2.08152	3.33811	0.0458768	0.988478	0	25.72	2.05635
Proteobacteria_4334053	2.0401	3.71671	0.0281637	0.996361	0	23.8	2.04616
Firmicutes_841344	2.05076	3.48698	0.0364292	0.992314	0	25.4	2.04616
Firmicutes_187929	2.0423	1.12701	0.338676	0.838814	1.92586e-06	26	2.02512
Firmicutes_363519	2.36971	1.94477	0.241993	0.938071	7.51727e-11	26	2.02308
Firmicutes_4387771	2.10129	1.67919	0.219636	0.890253	9.17189e-08	26	2.00747
Firmicutes_361702	2.39831	2.56165	0.160374	0.977777	2.12497e-15	26	2.00475
Firmicutes_885437	2.32607	1.65436	0.287137	0.904464	2.88156e-08	26	1.99864
Firmicutes_367417	3.47117	0.344954	0.866826	0.932174	2.48421e-10	26	1.98574
Firmicutes_232030	2.07549	2.38207	0.111832	0.933018	9.24653e-10	26	1.98439
Proteobacteria_388951	2.01748	3.75151	0.0251096	0.996832	0	22.2	1.96334
Bacteroidetes_692756	2.09676	3.10053	0.0598859	0.982346	1.55431e-17	25.98	1.95995
Firmicutes_187883	2.19951	0.866846	0.479663	0.819121	5.73336e-05	26	1.95995
Firmicutes_300491	2.68463	1.60529	0.384462	0.947034	9.01814e-12	26	1.95995
Firmicutes_174695	2.41474	1.50552	0.343404	0.895813	6.94085e-08	26	1.94433
Firmicutes_4477551	2.12368	3.1307	0.0621825	0.984317	4.44089e-18	25.98	1.94094
Firmicutes_591399	2.03351	2.56678	0.0847629	0.939038	1.77967e-10	26	1.93347
Firmicutes_185864	2.2173	1.8362	0.222179	0.915002	1.94758e-08	26	1.926
Bacteroidetes_4310221	1.96234	3.78399	0.0197382	0.996838	0	21.1	1.90835
Firmicutes_335816	2.42979	0.985362	0.497285	0.852382	4.11018e-06	26	1.90428
Proteobacteria_437137	2.00637	3.3176	0.0374574	0.98697	0	25.76	1.9036
Firmicutes_519979	2.06631	3.61229	0.0338511	0.994005	0	24.28	1.89477
Bacteroidetes_194286	2.06343	3.52204	0.036692	0.993188	0	25.3	1.89477
Firmicutes_316081	2.10677	3.19508	0.0557947	0.985685	0	25.74	1.89409
Proteobacteria_809658	1.87774	2.83944	0.0408916	0.957006	2.43394e-12	26	1.89274
Firmicutes_4396426	2.87765	0.903989	0.61381	0.89545	3.70264e-08	26	1.89206
Firmicutes_173135	3.34032	0.396324	0.840761	0.930879	6.39638e-11	26	1.88663
Proteobacteria_178491	2.03185	3.71766	0.0273637	0.996285	0	23.34	1.88323
Firmicutes_4397737	2.69587	2.16422	0.279103	0.976594	5.10703e-16	26	1.87373
Bacteroidetes_4476561	2.4013	1.84739	0.267478	0.930329	4.99743e-10	26	1.87373
Firmicutes_183873	2.29742	1.68274	0.273223	0.89033	2.20106e-07	26	1.86762
Actinobacteria_2423305	1.96053	3.14741	0.0386941	0.978432	1.27898e-15	25.92	1.85132
Firmicutes_190595	2.24185	1.11834	0.40243	0.85691	3.4038e-07	26	1.84793
Proteobacteria_91962	2.15383	3.07936	0.0701195	0.983111	2.22045e-18	25.98	1.84453
Firmicutes_195252	1.76838	3.03154	0.020386	0.963561	8.01104e-11	25.96	1.83299
Firmicutes_190226	2.26927	2.76093	0.114187	0.975587	7.39409e-16	26	1.83299
Proteobacteria_4366834	1.95995	3.7071	0.0211696	0.99568	1.4877e-16	22.44	1.83096
Firmicutes_195465	2.01926	1.17814	0.31275	0.831365	1.24942e-05	26	1.81874
Firmicutes_571004	2.02622	3.66713	0.0281937	0.995712	0	24.08	1.81806
Firmicutes_4407747	2.12169	3.15631	0.0604435	0.98566	0	26	1.80991
Firmicutes_190649	2.33475	1.34779	0.361118	0.86358	1.88025e-05	26	1.80652
Firmicutes_4296216	2.06845	3.69264	0.0316349	0.995086	0	23.1	1.80109
Firmicutes_296187	2.23817	3.26169	0.0718819	0.990403	0	25.9	1.79905
Firmicutes_348642	2.28513	1.77998	0.250368	0.904223	3.1722e-07	26	1.79226
Firmicutes_178571	2.0047	3.79876	0.0228721	0.997593	0	21.2	1.79022
Proteobacteria_4435982	2.32925	2.91157	0.112062	0.985082	0	25.98	1.78615
Firmicutes_4402645	1.84302	2.76931	0.0392905	0.948679	1.24859e-10	26	1.77665
Firmicutes_3390534	1.86976	2.25091	0.080696	0.911014	2.02239e-07	26	1.77393
Firmicutes_190365	1.98522	3.74809	0.0223815	0.996303	0	21.68	1.77189
Firmicutes_4324040	1.90281	2.5557	0.0611408	0.937678	5.08328e-10	26	1.7685
Proteobacteria_3275744	1.83169	2.83213	0.0343313	0.95332	4.44393e-11	26	1.76714
Firmicutes_183054	2.57693	1.05536	0.508628	0.872755	2.43234e-07	26	1.76443
Firmicutes_20799	2.04396	3.71376	0.0286632	0.996314	0	23.44	1.75289
Firmicutes_3141342	2.48498	1.9747	0.264252	0.955256	1.41472e-12	26	1.75153
Firmicutes_510295	1.99926	3.58551	0.0279082	0.992857	0	24.36	1.74813
Firmicutes_47737	1.99714	3.70507	0.0244699	0.995802	0	22.9	1.74813
Firmicutes_4437368	1.82334	1.70823	0.133373	0.857942	1.45984e-06	26	1.74406
Firmicutes_3550973	2.02679	3.3278	0.0393812	0.986842	0	25.7	1.7427
Firmicutes_4456702	2.71089	2.08279	0.295793	0.96935	1.97375e-14	26	1.74134
Firmicutes_186851	2.01626	2.49374	0.0872629	0.932896	1.68648e-10	26	1.73931
Proteobacteria_4419276	2.05623	3.66146	0.0313455	0.995328	0	24.7	1.73727
Firmicutes_312586	1.81507	1.58159	0.151759	0.855208	1.63213e-05	26	1.7298
Proteobacteria_7366	2.10406	2.62879	0.0931932	0.957676	5.10631e-12	26	1.7298
Firmicutes_4414044	2.13064	1.316	0.310026	0.85095	2.57436e-06	26	1.72912
Firmicutes_25005	2.67491	1.03841	0.53221	0.879575	1.30558e-07	26	1.72845
Bacteroidetes_4453743	2.25848	3.21218	0.0780033	0.98974	0	26	1.72641
Actinobacteria_282360	2.12004	3.33769	0.0509811	0.99057	0	25.92	1.72437
Firmicutes_4379646	2.54199	2.27797	0.228041	0.967277	3.8558e-14	26	1.71283
Firmicutes_189387	2.34039	1.80229	0.260141	0.917599	7.3397e-10	26	1.70604
Firmicutes_4339160	2.02405	3.76327	0.0254162	0.996144	0	21.7	1.70061
Tenericutes_50779	1.94856	3.36168	0.0293371	0.984643	2.44249e-17	25.4	1.6979
Firmicutes_3794053	2.29201	1.09118	0.424906	0.844077	1.79168e-06	26	1.69586
Firmicutes_4338990	1.89359	3.44434	0.0215324	0.987186	2.46736e-14	25.04	1.69314
Firmicutes_4323865	1.99736	3.67468	0.0251996	0.994498	1.15463e-16	22.54	1.6816
Firmicutes_191434	2.31435	1.07414	0.434513	0.841406	2.43351e-05	26	1.67413
Tenericutes_1046624	1.95953	3.31067	0.0321537	0.986582	0	25.72	1.67142
Firmicutes_179291	2.84309	1.85299	0.365459	0.964796	1.49956e-13	26	1.67074
Firmicutes_177153	1.98986	2.91095	0.0538196	0.966128	3.35776e-14	26	1.67006
Tenericutes_234951	1.94787	3.66969	0.0209596	0.993883	2.44249e-17	22.62	1.66735
Firmicutes_358007	1.98788	2.95521	0.0510352	0.970656	3.16724e-14	25.96	1.66667
Firmicutes_182196	2.36382	1.36063	0.364972	0.867159	3.02875e-06	26	1.66531
Cyanobacteria_4422313	2.65993	2.02483	0.294692	0.960215	2.76887e-13	26	1.66327
Firmicutes_2046330	2.03724	3.08924	0.0512449	0.979889	2.66454e-17	26	1.66191
Proteobacteria_1146761	2.10361	2.45626	0.109401	0.952643	1.88164e-11	26	1.65988
Firmicutes_193797	1.88976	2.23593	0.0834364	0.912327	1.84831e-07	26	1.65716
Firmicutes_295258	2.27784	1.75816	0.252426	0.899189	1.60706e-07	26	1.65648
Firmicutes_3369303	2.20116	2.96395	0.0851562	0.978449	5.32907e-17	25.96	1.65445
Bacteroidetes_102407	2.25496	1.25102	0.366322	0.862809	1.08289e-05	26	1.65105
Firmicutes_180975	2.13891	3.00104	0.0721475	0.978763	1.13243e-16	26	1.65105
Proteobacteria_4455386	2.47313	2.78119	0.151362	0.985295	0	26	1.65037
Firmicutes_4411295	2.07014	3.55738	0.0360692	0.991973	0	24.66	1.64562
Proteobacteria_841907	1.95148	3.39561	0.0286896	0.986896	2.22045e-17	25.32	1.64494
Firmicutes_30062	2.24019	2.52907	0.130549	0.95889	3.92843e-12	26	1.64291
Firmicutes_4331723	2.0052	1.30198	0.27354	0.812948	7.69637e-05	26	1.6368
Firmicutes_4452107	2.87309	1.88724	0.364332	0.971252	6.3749e-15	26	1.63408
Firmicutes_369014	2.48557	1.20958	0.438482	0.872608	2.60487e-06	26	1.6334
Actinobacteria_471180	2.14451	3.39887	0.0514078	0.990765	0	25.82	1.63272
Proteobacteria_873972	1.9729	3.76344	0.0210752	0.996777	8.88178e-17	21.2	1.63136
Firmicutes_179319	2.78848	1.78136	0.368393	0.957171	3.41653e-13	26	1.63001
Firmicutes_3422630	2.08031	1.76236	0.196992	0.878625	2.64949e-07	26	1.62729
Firmicutes_4380191	2.59144	1.009	0.525436	0.863437	3.13942e-07	26	1.62458
Bacteroidetes_180731	2.03529	3.67051	0.0289829	0.99562	0	23.98	1.62186
Bacteroidetes_338754	2.53577	2.54226	0.190963	0.9871	0	26	1.61711
Firmicutes_147678	2.02013	3.67561	0.0273161	0.994509	0	22.22	1.61507
Proteobacteria_824742	2.04452	2.23794	0.118947	0.931742	3.25856e-10	26	1.6076
Firmicutes_4225004	2.11659	1.33157	0.301711	0.85907	4.41143e-06	26	1.60489
Firmicutes_455407	2.2302	2.81887	0.101526	0.973819	5.41123e-15	26	1.60149
Bacteroidetes_360000	2.0725	3.49863	0.0383455	0.991414	0	24.44	1.59538
Firmicutes_212686	2.33341	1.70041	0.278194	0.901226	1.04819e-07	26	1.58995
Tenericutes_4469164	1.94332	3.75824	0.0186964	0.996469	0	21.02	1.58859
Firmicutes_213870	2.43482	2.29251	0.202368	0.954541	1.03874e-12	26	1.57298
Firmicutes_975306	2.78951	1.48576	0.434819	0.957738	1.39641e-10	26	1.57298
Firmicutes_4484075	2.4223	1.17372	0.433132	0.86548	1.31447e-07	26	1.57026
Bacteroidetes_103730	2.01804	3.67595	0.0270863	0.993096	1.77636e-17	21.12	1.56551
Firmicutes_294246	1.92883	3.69494	0.0188382	0.994777	0	22.72	1.5628
Bacteroidetes_1135042	1.99355	3.45737	0.0311205	0.989782	2.22045e-18	25.2	1.5628
Firmicutes_187894	2.04613	1.86341	0.170142	0.896731	2.15227e-08	26	1.55533
Firmicutes_190441	2.2605	1.31832	0.348228	0.861871	5.09252e-07	26	1.55261
Actinobacteria_1146291	2.0373	3.32382	0.0408221	0.987952	0	25.7	1.55126
Firmicutes_189235	1.84455	3.34045	0.0197068	0.980821	2.78666e-15	25.44	1.53971
Proteobacteria_4363066	2.19439	2.88009	0.0899707	0.977495	4.01901e-16	26	1.53971
Firmicutes_4314257	2.20532	1.86605	0.212312	0.903064	4.76918e-08	26	1.53768
Actinobacteria_1082607	2.34884	2.31642	0.179713	0.95197	8.80702e-13	26	1.52953
Firmicutes_3568684	2.44515	1.6604	0.315551	0.908861	2.87371e-09	26	1.52885
Firmicutes_182033	2.6026	1.34753	0.429052	0.902789	3.10211e-08	26	1.52885
Firmicutes_180136	2.34504	2.24558	0.188166	0.947007	9.78214e-12	26	1.52682
Firmicutes_4428313	2.05183	3.40958	0.0392171	0.98958	0	25.3	1.52546
Firmicutes_1144153	2.23304	2.90221	0.0954039	0.980501	7.10543e-17	26	1.51799
Firmicutes_4330852	1.8424	2.89623	0.0333095	0.954736	1.93448e-11	25.98	1.51052
Firmicutes_316728	2.04154	3.6347	0.0306037	0.994124	0	24.3	1.50984
Firmicutes_173917	2.25411	2.00858	0.20195	0.912876	3.44906e-09	26	1.50509
Proteobacteria_4351284	2.27628	3.20413	0.0814437	0.989091	0	25.98	1.50509
Firmicutes_300662	2.17391	2.39371	0.130875	0.939104	8.23076e-11	26	1.49762
Firmicutes_174516	1.98565	3.23528	0.0378864	0.981937	1.5099e-16	25.58	1.49559
Bacteroidetes_4401110	2.26025	0.613886	0.600069	0.781085	8.1417e-05	26	1.49151
Firmicutes_4300206	2.10228	3.30464	0.0500624	0.988057	0	25.84	1.48337
Firmicutes_188333	1.69893	1.33194	0.155969	0.834207	7.77101e-06	26	1.47251
Firmicutes_187517	1.98304	2.90952	0.0529727	0.963438	1.22569e-13	26	1.47047
Firmicutes_503372	2.20109	2.8517	0.093452	0.973828	1.29896e-15	25.98	1.46911
Proteobacteria_4431355	3.22775	1.2848	0.560944	0.963224	3.6029e-13	26	1.46504
Firmicutes_110060	2.51194	2.38926	0.205683	0.966304	1.97531e-14	26	1.46436
Firmicutes_836693	1.90721	1.74136	0.148464	0.868015	3.58935e-07	26	1.46029
Firmicutes_217109	2.08991	1.57331	0.235628	0.867413	2.80027e-06	26	1.45689
Firmicutes_185232	2.25628	1.05711	0.424568	0.827614	9.82439e-05	26	1.45689
Firmicutes_1108745	2.15611	2.66908	0.0999657	0.962531	1.38882e-13	26	1.45553
Firmicutes_173245	2.02942	3.43987	0.0356514	0.990835	0	25.32	1.45418
Actinobacteria_12574	2.85619	1.30062	0.490079	0.9094	4.44142e-09	26	1.45146
Firmicutes_4349946	1.85281	2.85037	0.0366691	0.956343	1.18175e-11	26	1.4501
Proteobacteria_4383961	1.74075	2.70048	0.0281242	0.940548	1.20799e-08	26	1.44942
Firmicutes_197539	2.02493	2.97938	0.0550988	0.973866	2.31815e-15	25.96	1.44807
Firmicutes_308734	2.11472	3.2477	0.0546405	0.986682	0	25.88	1.44603
Firmicutes_188881	2.08811	2.91324	0.0695325	0.965477	2.11708e-13	25.98	1.44263
Proteobacteria_4406538	2.01222	3.59995	0.0286703	0.994297	0	24.86	1.43245
Firmicutes_174288	2.32477	1.6014	0.29689	0.880263	2.22653e-07	26	1.43041
Bacteroidetes_4401375	2.64607	1.48096	0.406223	0.966073	5.04019e-14	26	1.42838
Firmicutes_1059977	2.08187	3.3155	0.0469415	0.986846	0	25.72	1.42566
Firmicutes_128297	2.23926	2.64512	0.118406	0.971423	4.40981e-15	26	1.4243
Firmicutes_362793	2.23401	2.68014	0.114291	0.965949	3.47078e-14	26	1.4243
Bacteroidetes_750071	1.90645	3.72709	0.0165113	0.994364	1.14242e-14	20.38	1.42091
Firmicutes_4456605	2.05237	1.01395	0.372974	0.818708	2.02669e-05	26	1.41955
Firmicutes_105109	2.33705	2.58533	0.144795	0.96507	1.90337e-14	26	1.41005
Firmicutes_997267	2.0668	3.02088	0.0594341	0.97593	9.10383e-16	25.86	1.40937
Firmicutes_189708	2.0464	1.1576	0.322731	0.828134	1.49932e-05	26	1.40394
Firmicutes_964363	2.10276	3.24282	0.0533314	0.985453	8.88178e-18	25.88	1.40122
Firmicutes_4335815	1.94047	1.42154	0.220332	0.838896	7.87793e-06	26	1.40054
Actinobacteria_4332878	2.12084	2.63396	0.0963294	0.957088	6.39055e-13	25.98	1.39715
Firmicutes_178859	2.19475	2.7864	0.0976683	0.968447	1.85163e-14	26	1.39172
Firmicutes_235212	1.88485	3.47741	0.0198635	0.987488	4.24105e-16	24.66	1.38832
Firmicutes_197354	2.54935	1.60497	0.352734	0.904083	5.20017e-09	26	1.38289
Proteobacteria_253584	2.1911	2.89644	0.0883197	0.974837	2.44915e-15	26	1.37746
Firmicutes_177660	1.9746	2.61182	0.0698931	0.945295	3.11709e-11	26	1.3761
Firmicutes_188329	1.90361	1.29818	0.236357	0.812565	1.15575e-05	26	1.37407
Bacteroidetes_208843	1.93911	3.62475	0.0212105	0.993265	0	23.02	1.37339
Firmicutes_807548	1.85685	2.72696	0.0435294	0.949182	1.74124e-09	25.98	1.37203
Firmicutes_4426874	2.2337	2.6628	0.115889	0.964236	1.66509e-13	26	1.37067
Proteobacteria_328912	2.37702	2.92627	0.119493	0.982394	1.11022e-17	26	1.36864
Actinobacteria_230578	2.02902	3.03766	0.0527961	0.97214	2.15605e-15	25.88	1.36728
Firmicutes_4414725	2.71537	2.18961	0.278743	0.970952	6.4853e-13	26	1.36456
Firmicutes_363035	1.88677	3.01389	0.0343293	0.96552	4.95074e-12	25.94	1.3632
Bacteroidetes_3785400	2.34662	3.02043	0.106235	0.986804	0	26	1.35913
Firmicutes_130103	2.20286	2.90846	0.089509	0.97308	9.65894e-16	26	1.34759
Firmicutes_221429	2.33439	2.37575	0.168501	0.972862	3.61466e-14	26	1.34487
Bacteroidetes_190233	2.11002	3.1625	0.0582772	0.983496	0	25.92	1.33876
Firmicutes_227565	2.67549	2.12098	0.281262	0.958664	1.52092e-13	26	1.33198
Firmicutes_199490	2.50265	1.43879	0.379181	0.889801	4.76449e-08	26	1.32722
Firmicutes_4439487	1.91071	3.14414	0.0321658	0.976072	1.20748e-14	25.82	1.32111
Bacteroidetes_4319785	1.93333	3.624	0.0207792	0.992512	2.46025e-15	22.54	1.31908
Proteobacteria_744941	2.38009	1.58259	0.315839	0.903309	3.8829e-08	26	1.31908
Firmicutes_207340	2.02878	3.13426	0.0479518	0.978862	5.68434e-16	25.84	1.31636
Firmicutes_4431608	2.08107	3.38667	0.0437098	0.987843	0	25.56	1.31568
Firmicutes_2256425	2.3247	1.90784	0.235059	0.908371	3.13078e-09	26	1.315
Firmicutes_129798	2.08986	3.36014	0.0461735	0.989491	0	25.86	1.30889
Actinobacteria_13463	2.06258	2.91111	0.0650689	0.96951	1.74616e-14	25.98	1.30618
Tenericutes_29625	1.81526	3.37631	0.0161189	0.980144	6.65024e-15	24.96	1.30075
Firmicutes_4424113	2.24065	2.51275	0.132187	0.958114	4.32352e-13	26	1.29939
Bacteroidetes_340547	1.92138	3.15837	0.0330792	0.977582	3.06422e-15	25.86	1.29328
Firmicutes_3392840	2.22139	2.25968	0.157429	0.936662	1.2222e-10	26	1.28988
Firmicutes_215231	1.99739	1.62606	0.195517	0.852525	3.61939e-06	26	1.28445
Firmicutes_304973	2.7275	1.8579	0.339282	0.938043	7.67852e-11	26	1.27766
Firmicutes_175704	2.67249	2.38885	0.239593	0.968604	3.74811e-15	26	1.27223
Firmicutes_179557	2.12222	1.31614	0.306437	0.838235	7.41435e-06	26	1.27223
Firmicutes_4366527	2.42964	2.22509	0.210502	0.947411	3.56044e-12	26	1.27155
Firmicutes_186906	2.08681	1.48967	0.252432	0.864273	5.99713e-06	26	1.2702
Firmicutes_176297	1.77595	1.42759	0.163605	0.840484	7.05396e-05	26	1.26952
Proteobacteria_4424725	2.01204	3.71688	0.025469	0.995892	0	22.88	1.26069
Firmicutes_994357	2.10646	3.09724	0.0612559	0.981339	1.9984e-17	25.96	1.25933
Bacteroidetes_4450194	1.98832	3.74928	0.0225812	0.996288	0	21.74	1.25594
Firmicutes_207718	2.12863	3.36373	0.0509407	0.989014	0	25.88	1.2539
Bacteroidetes_356827	2.4199	2.89354	0.130281	0.983502	3.10862e-17	26	1.24644
Firmicutes_195004	2.82697	1.76823	0.3781	0.944212	1.40973e-11	26	1.24576
Firmicutes_4403113	2.37451	1.37564	0.363691	0.862242	3.81076e-07	26	1.24304
Firmicutes_182054	2.23944	1.29755	0.345954	0.855558	8.09527e-07	26	1.24168
Firmicutes_207994	2.40833	2.1586	0.215067	0.933393	1.47683e-10	26	1.24033
Firmicutes_290762	2.04681	3.4724	0.0364731	0.990692	0	25.18	1.23829
Bacteroidetes_732765	1.94844	3.40984	0.027705	0.988428	3.37508e-16	25.1	1.23693
Firmicutes_3692427	2.03713	3.56455	0.0323508	0.99128	0	24.7	1.2315
Firmicutes_4367187	2.187	2.79922	0.0949847	0.96981	1.31894e-14	25.98	1.2315
Firmicutes_195743	2.55357	1.20279	0.456237	0.870436	3.18042e-07	26	1.23082
Firmicutes_339566	2.24373	1.69038	0.254583	0.880373	1.97177e-07	26	1.22878
Firmicutes_4330715	1.98141	1.42098	0.233621	0.847467	2.7023e-06	26	1.22335
Firmicutes_516553	2.75689	2.2281	0.280949	0.966757	5.57177e-14	26	1.22335
Firmicutes_179384	1.74317	1.3078	0.172809	0.806169	9.5491e-05	26	1.21045
Firmicutes_193863	1.99296	1.46325	0.227013	0.840948	3.28298e-06	26	1.21045
Firmicutes_362955	1.99912	2.57482	0.0774164	0.945274	1.16437e-10	26	1.2091
Firmicutes_166164	2.00138	3.03108	0.0489728	0.972994	9.88098e-16	25.96	1.20842
Proteobacteria_263518	1.77895	3.06116	0.0205586	0.964713	2.26601e-13	25.7	1.20638
Bacteroidetes_4360055	2.63717	2.39909	0.230798	0.972952	8.89511e-15	26	1.2057
Firmicutes_334573	2.40242	1.99864	0.239643	0.929971	1.23215e-10	26	1.20434
Firmicutes_3856404	1.95504	3.74484	0.0198789	0.995851	0	20.34	1.20163
Firmicutes_229348	2.0491	2.99568	0.0579724	0.97614	2.9865e-15	25.96	1.19959
Firmicutes_177047	2.2355	2.13386	0.17763	0.923078	2.00767e-09	26	1.19891
Tenericutes_269619	1.89608	3.15108	0.030304	0.97195	3.41482e-14	25.72	1.1962
Bacteroidetes_1726408	2.2529	3.22267	0.0764322	0.986838	0	25.98	1.1962
Firmicutes_1696853	2.88651	1.79204	0.386344	0.965195	3.08875e-11	26	1.1962
Firmicutes_288930	2.03966	3.1751	0.0475111	0.981406	3.24185e-16	25.88	1.19145
Fusobacteria_4466843	2.27061	2.99677	0.094638	0.980813	4.44089e-18	26	1.18737
Proteobacteria_4309033	2.05539	3.69597	0.030235	0.994949	0	24.2	1.18669
Firmicutes_4417708	1.93737	2.59849	0.0637968	0.944618	1.78955e-11	26	1.1833
Firmicutes_177446	1.83314	3.25814	0.0203797	0.978875	4.51639e-15	25.26	1.1799
Proteobacteria_370077	1.9269	3.45922	0.0241359	0.989202	8.88178e-18	24.74	1.1799
Firmicutes_583134	2.13827	2.13126	0.153804	0.919041	5.5895e-09	26	1.17855
Firmicutes_1051082	1.98911	3.25472	0.037574	0.982744	1.75415e-16	25.62	1.17379
Firmicutes_181827	1.7605	1.37813	0.163495	0.828469	1.59694e-05	26	1.17176
Firmicutes_186081	2.15515	3.37311	0.0540828	0.989322	0	25.9	1.16972
Firmicutes_190987	2.16658	3.02608	0.0750584	0.978265	2.02061e-16	26	1.16701
Firmicutes_4326869	1.63852	1.39201	0.118156	0.836444	2.37371e-06	26	1.16701
Firmicutes_2864281	1.98788	3.74392	0.0226881	0.995736	8.02247e-15	21.08	1.16633
Firmicutes_4341886	2.38937	2.63958	0.149302	0.979902	7.99361e-16	26	1.16429
Firmicutes_340711	1.79554	1.95597	0.0897289	0.894907	2.43344e-07	26	1.16293
Firmicutes_303326	2.25188	1.75507	0.244666	0.884512	1.60719e-07	26	1.16225
Firmicutes_52166	2.01258	3.75811	0.0245605	0.996756	0	21.74	1.16225
Bacteroidetes_1057169	2.01921	3.73647	0.0256444	0.995266	3.10862e-17	20.96	1.15547
Firmicutes_175298	2.09068	3.36593	0.0458823	0.987159	0	25.6	1.15411
Firmicutes_529740	2.33239	2.95071	0.109271	0.979569	1.90958e-16	26	1.15003
Firmicutes_300646	2.1616	1.68325	0.233092	0.870436	2.22519e-07	26	1.14664
Firmicutes_197708	1.69467	1.37911	0.141561	0.826763	3.05089e-05	26	1.14392
Firmicutes_4398588	2.34421	2.42687	0.164216	0.959563	3.01255e-13	26	1.14257
Firmicutes_182097	2.17627	1.35542	0.311613	0.840482	2.34576e-06	26	1.13917
Proteobacteria_540793	2.0741	3.36026	0.044126	0.987153	1.33227e-17	25.52	1.1351
Bacteroidetes_234488	2.60403	1.63648	0.358075	0.909935	7.04724e-08	26	1.13238
Firmicutes_184984	1.79705	1.26254	0.204023	0.816222	0.000234699	26	1.13238
Tenericutes_1111522	1.91905	3.27706	0.0286254	0.980178	1.24478e-14	25.6	1.13103
Firmicutes_184910	2.68507	1.77054	0.347512	0.930183	5.67604e-10	26	1.12695
Firmicutes_176450	2.43486	1.86007	0.271348	0.905201	4.70627e-07	26	1.12356
Firmicutes_97263	1.96699	3.73042	0.0212176	0.996284	8.88178e-18	21.76	1.12356
Firmicutes_291644	2.02451	3.66389	0.028111	0.994664	0	23.96	1.11745
Firmicutes_189588	2.22658	1.55715	0.277236	0.871204	4.32815e-07	26	1.11677
Firmicutes_586453	1.91784	2.53779	0.0645407	0.939187	1.5318e-10	26	1.1127
Firmicutes_302128	2.42613	1.90447	0.261454	0.912359	8.12896e-09	26	1.1093
Bacteroidetes_4278525	1.96985	1.27346	0.264695	0.821593	1.62555e-05	26	1.10862
Firmicutes_194557	1.9691	1.74198	0.16535	0.881187	5.28024e-08	26	1.10659
Firmicutes_175932	2.71836	2.12208	0.289862	0.951042	1.74188e-12	26	1.10659
Firmicutes_188764	1.83686	1.6648	0.140123	0.870216	1.19053e-05	26	1.10591
Actinobacteria_2990918	2.08429	2.97578	0.0647759	0.973321	3.61866e-14	25.96	1.10183
Firmicutes_842596	1.89264	3.09338	0.0317846	0.978388	2.14495e-15	25.88	1.09912
Firmicutes_1679707	1.97335	1.67184	0.179123	0.873441	4.13264e-07	26	1.0964
Firmicutes_845544	2.74837	1.40883	0.442992	0.870021	1.03629e-06	26	1.09165
Firmicutes_180352	2.01402	1.52684	0.22033	0.857571	3.06916e-06	26	1.09097
Firmicutes_47100	1.953	3.7435	0.0197592	0.996084	2.22045e-18	20.92	1.09029
Firmicutes_121873	2.15428	2.26857	0.140155	0.925551	4.16939e-10	26	1.08893
Firmicutes_213762	1.98383	3.21174	0.0385621	0.980394	2.42029e-16	25.92	1.0835
Bacteroidetes_363625	1.87967	1.33882	0.216308	0.818711	0.000119816	26	1.08282
Firmicutes_191978	2.23524	1.63697	0.263445	0.887904	6.3334e-08	26	1.07739
Firmicutes_367946	1.88251	2.98281	0.0345826	0.967859	3.00648e-12	25.92	1.07536
Firmicutes_195029	2.1602	2.52792	0.113462	0.950127	3.19221e-11	26	1.07536
Cyanobacteria_4471279	2.23855	2.74249	0.109408	0.96669	6.41776e-14	26	1.07196
Actinobacteria_969248	1.95688	3.49761	0.0260033	0.989355	2.44249e-17	24.34	1.06721
Firmicutes_621472	2.52574	1.49486	0.369514	0.909003	2.1356e-07	26	1.06653
Firmicutes_532922	2.11871	3.04557	0.0659483	0.979307	4.88498e-17	25.98	1.06246
Firmicutes_195728	1.99644	3.42714	0.0321418	0.988398	0	24.48	1.05906
Firmicutes_300394	2.10105	3.18379	0.0555223	0.984028	2.22045e-18	25.74	1.05703
Firmicutes_114348	2.16546	1.9458	0.187382	0.902175	4.83961e-08	26	1.05635
Firmicutes_2500766	2.15459	3.34689	0.0552342	0.987307	0	25.9	1.05363
Bacteroidetes_2331530	1.81306	1.24251	0.216175	0.823346	0.000237917	26	1.05363
Tenericutes_977628	1.97113	3.77352	0.0205802	0.997006	0	20.58	1.05024
Firmicutes_531495	1.87055	3.48661	0.0184164	0.986834	6.59472e-16	23.58	1.04956
Firmicutes_368203	2.216	1.24873	0.351676	0.837287	9.6071e-06	26	1.0482
Firmicutes_530379	1.98916	1.5783	0.201088	0.862759	1.15468e-06	26	1.0387
Firmicutes_4442387	2.82223	1.45856	0.445608	0.916767	1.88632e-09	26	1.0387
Firmicutes_184013	2.33611	2.37416	0.168936	0.945499	6.55719e-11	26	1.03802
Firmicutes_530094	1.96837	1.21666	0.280041	0.80875	0.000120041	26	1.03802
Firmicutes_276643	2.77452	1.79885	0.361272	0.925651	3.77884e-10	26	1.03462
Firmicutes_324882	2.29199	2.36073	0.160579	0.939747	2.11724e-10	26	1.03394
Firmicutes_183169	2.16494	1.48156	0.277705	0.839561	1.59665e-05	26	1.03394
Firmicutes_1039584	2.00871	3.27903	0.0389378	0.983635	1.33227e-17	25.56	1.03394
Firmicutes_113397	2.028	2.48255	0.0901725	0.935571	1.86877e-10	26	1.03191
Bacteroidetes_2069039	2.08368	1.80656	0.187925	0.88406	1.93526e-05	26	1.02512
Firmicutes_4416646	1.98638	1.74572	0.169682	0.861154	1.23356e-06	26	1.02172
Firmicutes_189760	2.03232	1.49204	0.233692	0.850734	2.12489e-06	26	1.02105
Firmicutes_299441	1.84357	3.1568	0.0241093	0.97443	8.29115e-15	25.58	1.01833
Firmicutes_186379	2.21007	1.96448	0.195591	0.891361	9.99062e-09	26	1.01426
Firmicutes_166869	1.90606	1.58275	0.173344	0.8491	7.11279e-06	26	1.01358
Proteobacteria_2317377	2.09939	3.53517	0.0402095	0.99144	0	24.86	1.01154
Firmicutes_174901	1.99886	3.47263	0.0311264	0.988766	2.22045e-18	24.7	1.00679
Tenericutes_1129069	1.8744	3.51049	0.0182011	0.987918	4.1922e-15	23.22	1.00611
Firmicutes_177986	2.15566	3.0661	0.0706018	0.980233	8.43769e-17	25.98	1.00543
Firmicutes_194322	1.92118	2.00842	0.114133	0.896721	3.26849e-08	26	1.00475
Firmicutes_191442	1.85818	1.23537	0.232436	0.828384	1.74073e-05	26	1.00339
Firmicutes_627429	2.08945	2.91809	0.0692543	0.96877	1.83631e-14	26	0.999321
Firmicutes_520413	1.52713	1.20413	0.105809	0.817684	9.22314e-06	26	0.995927
Bacteroidetes_610111	2.03935	3.74243	0.0273725	0.994156	1.32561e-15	21.02	0.992532
Firmicutes_230479	2.09078	2.50018	0.10145	0.937101	9.59526e-11	26	0.991174
Firmicutes_295556	2.02159	3.63094	0.0287303	0.993222	0	23.68	0.991174
Actinobacteria_1058762	1.98427	3.55856	0.027016	0.990955	3.77476e-17	23.6	0.991174
Firmicutes_110144	1.9569	2.14106	0.107239	0.90779	1.41542e-08	26	0.991174
Firmicutes_536866	2.40018	2.4623	0.17202	0.955401	1.17006e-12	26	0.989817
Firmicutes_1077751	2.03356	3.50406	0.033849	0.990986	0	25.26	0.986422
Cyanobacteria_279048	1.99908	3.61152	0.0271047	0.993907	0	24.04	0.983028
Firmicutes_175909	1.86628	1.54298	0.167596	0.832368	1.31056e-05	26	0.98167
Firmicutes_147195	2.06393	2.62249	0.0853716	0.950134	1.60674e-10	26	0.980312
Firmicutes_191683	2.03709	1.37392	0.262644	0.817235	1.24038e-05	26	0.979633
Firmicutes_191913	2.23953	1.54329	0.284908	0.860135	3.10973e-07	26	0.978276
Bacteroidetes_160178	1.68409	1.03076	0.217974	0.789445	2.35326e-05	26	0.977597
Firmicutes_4344207	2.1021	2.86637	0.0746567	0.967085	3.31735e-14	25.98	0.974202
Firmicutes_329703	1.77412	2.23294	0.0579376	0.910246	9.1717e-08	26	0.973523
Proteobacteria_4393057	1.75524	2.93879	0.0211539	0.9643	8.94032e-13	25.88	0.972845
Firmicutes_4383922	2.69037	1.93658	0.316822	0.928596	1.28776e-10	26	0.96945
Firmicutes_843569	1.94798	2.85509	0.0498848	0.956353	4.19951e-13	25.98	0.96945
Firmicutes_128382	2.19497	2.74815	0.100605	0.961272	1.17812e-13	26	0.967413
Firmicutes_514272	2.34886	2.58752	0.146711	0.972454	2.8666e-15	26	0.966056
Firmicutes_17598	2.00781	3.19992	0.0419856	0.979791	2.55351e-16	25.82	0.966056
Firmicutes_183827	2.0059	3.04629	0.0488515	0.973385	5.04485e-15	25.94	0.965377
Proteobacteria_2654263	2.45694	2.50163	0.179124	0.958309	1.98916e-13	26	0.964019
Firmicutes_194380	2.35474	2.51884	0.155529	0.954476	2.70565e-12	26	0.961982
Firmicutes_176924	1.9211	1.31187	0.2354	0.813063	2.18397e-05	26	0.959946
Firmicutes_182797	2.08592	2.98812	0.0640129	0.970296	7.2653e-15	25.98	0.95723
Firmicutes_4357714	1.91706	3.54195	0.0211705	0.989996	1.75016e-14	23	0.95723
Firmicutes_195015	2.48745	1.806	0.294482	0.911043	3.80228e-09	26	0.953836
Firmicutes_4428544	1.9497	3.05958	0.0398836	0.978418	1.9984e-16	24.74	0.951799
Bacteroidetes_4381422	2.37679	2.74746	0.135854	0.974501	6.30607e-16	26	0.950441
Firmicutes_177731	2.17088	2.38927	0.129855	0.94136	4.75504e-11	26	0.949762
Firmicutes_2978122	2.44941	1.89535	0.268034	0.907876	9.32884e-09	26	0.949762
Firmicutes_4459184	2.31937	3.02504	0.100966	0.982176	6.66134e-18	25.98	0.947726
Firmicutes_4343226	2.12701	2.2111	0.140501	0.915106	2.43294e-08	26	0.946368
Firmicutes_185312	2.40018	2.96478	0.120332	0.97942	2.44249e-16	26	0.94501
Bacteroidetes_4467984	2.01205	2.80525	0.0632909	0.957015	5.58628e-12	26	0.942974
Firmicutes_179760	2.0234	1.92069	0.152602	0.893063	4.87039e-08	26	0.941616
Bacteroidetes_188887	1.74333	1.11159	0.21838	0.79416	4.15357e-05	26	0.940258
Bacteroidetes_2859978	2.6579	0.953998	0.556864	0.831526	1.65045e-06	26	0.938221
Firmicutes_186272	2.08818	2.34693	0.116207	0.924204	1.87057e-09	26	0.938221
Firmicutes_198210	1.81308	2.60474	0.0420218	0.943385	1.62138e-10	26	0.937542
Proteobacteria_4453998	2.01399	3.63309	0.0278575	0.993621	0	23.4	0.937542
Firmicutes_183454	1.58218	2.73493	0.0102671	0.9477	2.12507e-10	25.94	0.936864
Firmicutes_1105016	2.04295	3.65795	0.0300224	0.994143	0	23.44	0.936185
Firmicutes_4451087	1.9868	3.63284	0.0252172	0.992448	8.9484e-16	20.2	0.932111
Bacteroidetes_312770	2.10229	2.86185	0.074823	0.968753	1.32805e-14	25.98	0.929396
Actinobacteria_104135	2.17746	2.92712	0.0835171	0.97138	3.27738e-15	26	0.928038
Firmicutes_4431850	1.99648	3.42107	0.0324743	0.987504	4.44089e-18	25.08	0.928038
Firmicutes_157972	2.15397	3.08521	0.0691046	0.978145	1.70974e-16	25.94	0.92668
Cyanobacteria_320915	2.11744	3.22116	0.0561264	0.982353	4.44089e-18	25.8	0.926001
Firmicutes_204126	1.91023	1.41873	0.208211	0.832197	4.19744e-05	26	0.925322
Bacteroidetes_299882	1.97326	3.64868	0.0236401	0.993218	1.55431e-17	22.38	0.925322
Firmicutes_299732	1.99225	3.22612	0.0391682	0.980722	7.77156e-17	25.76	0.919891
Firmicutes_4478840	1.97321	3.1573	0.0393006	0.977127	2.33591e-15	25.72	0.919212
Firmicutes_358639	2.3531	3.07049	0.103392	0.98141	3.9968e-17	26	0.917855
Firmicutes_581201	1.93477	3.11894	0.0360604	0.975175	1.75016e-14	25.82	0.913781
Firmicutes_179201	1.72056	1.54212	0.118507	0.857766	2.81608e-06	26	0.909029
Firmicutes_493391	1.94822	3.48015	0.0255508	0.990421	5.32907e-17	23.44	0.907671
Firmicutes_207252	1.9708	1.86825	0.145503	0.874645	1.95925e-07	26	0.906314
Firmicutes_4451477	2.0782	3.42915	0.0417318	0.988695	0	25.46	0.905635
Bacteroidetes_1035532	2.01675	3.36394	0.0366439	0.986651	0	25.5	0.90224
Firmicutes_338105	1.80544	2.38493	0.0533712	0.923846	2.68877e-07	26	0.899525
Firmicutes_158649	2.02877	2.09435	0.130083	0.908305	9.67676e-09	26	0.899525
Firmicutes_4329132	2.46564	1.80848	0.290017	0.898712	4.2328e-07	26	0.897488
Firmicutes_178497	1.9748	3.6694	0.0232545	0.994146	2.22045e-17	21.94	0.89613
Firmicutes_176113	1.70878	1.38381	0.141419	0.848166	2.5297e-06	26	0.892057
Firmicutes_341969	2.6706	1.98992	0.3031	0.940114	2.53807e-11	26	0.890699
Firmicutes_324015	1.90354	2.22392	0.0862499	0.910886	1.57902e-08	26	0.89002
Proteobacteria_3443818	2.51772	2.40931	0.203953	0.946792	7.64308e-11	26	0.887305
Firmicutes_4431592	2.033	3.43252	0.036128	0.98804	0	25.24	0.885947
Proteobacteria_141365	2.3545	3.15519	0.0973034	0.983556	6.66134e-18	25.98	0.885268
Bacteroidetes_4360128	2.27152	1.35273	0.33821	0.836196	3.07829e-06	26	0.88391
Proteobacteria_4469481	1.97976	3.73468	0.0222035	0.995218	5.9952e-17	21.16	0.88391
Firmicutes_194372	2.29014	1.6402	0.276792	0.866027	2.2035e-07	26	0.882553
Firmicutes_181171	1.62833	1.34484	0.119095	0.841155	9.50852e-06	26	0.879837
Firmicutes_182245	2.05279	3.48277	0.0366682	0.988722	0	24.98	0.879837
Firmicutes_306315	2.37475	2.40968	0.172962	0.953705	2.27661e-12	26	0.879837
Firmicutes_4468891	2.29218	1.9298	0.223215	0.905183	1.38321e-07	26	0.8778
Actinobacteria_227819	1.93555	2.56708	0.0651359	0.944584	4.82725e-11	26	0.8778
Firmicutes_361864	2.07333	2.54978	0.093152	0.949219	3.41067e-12	26	0.877122
Firmicutes_4460680	2.06211	3.6006	0.0337823	0.991628	0	24.4	0.871012
Firmicutes_850841	1.98111	3.4791	0.0290034	0.989767	1.55431e-17	24.78	0.868296
Bacteroidetes_3757799	2.33112	1.55299	0.307765	0.882069	2.20968e-07	26	0.868296
Firmicutes_337511	2.07179	2.26695	0.120512	0.919885	9.53819e-10	26	0.862186
Firmicutes_3807411	2.16624	2.56458	0.110949	0.946817	7.63352e-12	26	0.861507
Firmicutes_4299396	2.05125	3.4269	0.0386058	0.987167	1.33227e-17	25.42	0.855397
Firmicutes_185235	2.13842	1.51161	0.260215	0.840825	3.5789e-06	26	0.854039
Firmicutes_312707	2.10205	1.73511	0.204656	0.877668	4.54322e-07	26	0.852003
Firmicutes_4375887	1.98757	3.07222	0.0450786	0.973969	1.38556e-15	25.84	0.852003
Bacteroidetes_847427	1.78585	3.34182	0.0145529	0.976626	5.97409e-13	23.64	0.849287
Firmicutes_361972	2.02901	1.56266	0.215629	0.845256	9.22226e-06	26	0.847251
Bacteroidetes_177150	2.75814	1.24006	0.488112	0.848138	2.65206e-06	26	0.846572
Firmicutes_175836	1.94849	1.93532	0.130007	0.890315	4.89006e-08	26	0.845214
Proteobacteria_4425394	2.0244	3.62707	0.0290738	0.993838	0	23.8	0.843177
Firmicutes_178151	2.37552	1.96422	0.2374	0.903809	8.70034e-09	26	0.841141
Firmicutes_334839	2.02086	3.6883	0.0270237	0.993875	0	22.78	0.838425
Proteobacteria_553648	2.33686	2.89639	0.114406	0.975468	8.41549e-16	26	0.837067
Firmicutes_198740	2.23831	2.71886	0.111269	0.965523	4.99534e-14	26	0.835709
Firmicutes_350189	1.74316	2.26483	0.0501622	0.927932	3.71145e-09	26	0.834352
Tenericutes_3040916	1.90963	3.58482	0.0195145	0.989229	8.59313e-16	22.24	0.831636
Firmicutes_197783	2.02821	3.35206	0.0385054	0.986029	2.22045e-18	25.6	0.831636
Bacteroidetes_3757787	2.06605	2.82854	0.0701799	0.971634	6.70359e-12	25.9	0.830278
Firmicutes_4296764	1.94444	3.55151	0.0233743	0.990398	0	23.38	0.828242
Firmicutes_4465275	2.0714	2.85963	0.069569	0.965543	1.65903e-13	25.96	0.826884
Firmicutes_4359984	1.87916	1.48562	0.182457	0.845051	6.25722e-06	26	0.826884
Firmicutes_554436	1.60836	1.24181	18.4506	0.798987	0.00047683	26	0.826205
Bacteroidetes_181239	1.67518	1.26568	0.15219	0.837647	9.43365e-06	26	0.820774
Firmicutes_2774254	2.25686	2.77021	0.110234	0.96212	2.22244e-12	26	0.818058
Firmicutes_197233	1.74852	2.36721	0.0441737	0.929036	9e-09	26	0.816022
Firmicutes_313524	2.09095	2.0737	0.148474	0.905081	9.42594e-08	26	0.810591
Firmicutes_375106	1.92534	2.271	0.0866159	0.9095	8.49144e-09	26	0.806517
Firmicutes_230268	2.37324	2.50853	0.160413	0.955618	1.673e-11	26	0.805838
Firmicutes_329798	1.93791	2.99137	0.0417495	0.966524	3.24072e-13	25.86	0.80516
Firmicutes_185622	1.67475	2.03104	0.0513565	0.896309	1.01785e-07	26	0.804481
Firmicutes_4410988	2.26187	2.44734	0.143366	0.940715	6.45755e-10	26	0.803802
Firmicutes_196314	2.02481	1.84846	0.163236	0.88787	4.53046e-07	26	0.803802
Proteobacteria_4452050	2.26289	2.56322	0.131196	0.954337	3.50461e-12	26	0.803802
Proteobacteria_1116679	2.0471	3.65486	0.0305474	0.992492	0	23.92	0.803123
Firmicutes_194425	2.21834	2.59144	0.118928	0.956892	3.80619e-12	25.98	0.800407
Firmicutes_146586	1.78009	2.83548	0.0275024	0.957665	1.26013e-11	25.88	0.798371
Firmicutes_4432520	2.04906	3.59251	0.0326224	0.99012	0	24.3	0.797013
Bacteroidetes_4406925	2.53524	2.85345	0.155788	0.978582	2.22045e-16	26	0.796334
Lentisphaerae_2136916	1.85881	2.90029	0.0351423	0.960438	2.87937e-11	25.94	0.794297
Firmicutes_193480	2.14375	2.033	0.167926	0.90421	6.99848e-09	26	0.794297
Actinobacteria_2985051	2.14151	2.14458	0.151636	0.90785	7.9424e-09	26	0.794297
Firmicutes_188454	2.09312	1.8207	0.186862	0.891127	1.63574e-07	26	0.793618
Firmicutes_593422	2.14112	2.44392	0.117303	0.933653	2.90251e-10	26	0.791582
Proteobacteria_230213	2.74949	2.62349	0.222698	0.966541	3.17235e-14	26	0.790224
Synergistetes_2941399	1.9766	3.56566	0.0261459	0.990069	6.66134e-18	23.12	0.788866
Bacteroidetes_197052	2.28069	2.02467	0.204531	0.913826	1.82452e-08	26	0.78683
Firmicutes_374557	2.30504	1.72391	0.263337	0.87104	2.13252e-07	26	0.782756
Bacteroidetes_4418496	1.91157	1.63619	0.165083	0.873668	7.91157e-08	26	0.777325
Lentisphaerae_635478	1.86673	2.8783	0.0369885	0.961013	4.74351e-12	25.9	0.776646
Firmicutes_195947	1.91271	2.65798	0.0549321	0.94595	4.25997e-11	25.98	0.773931
Bacteroidetes_4440301	2.1047	3.47678	0.0430786	0.989716	0	25.46	0.773252
Firmicutes_362948	1.81918	2.31426	0.0605768	0.920876	3.42177e-09	26	0.772573
Firmicutes_1602805	2.21342	2.5408	0.122869	0.950968	3.73812e-12	26	0.772573
Firmicutes_4468465	1.9306	3.56964	0.0217051	0.989022	4.52971e-16	22.18	0.769857
Firmicutes_187007	1.91864	2.33824	0.079124	0.920031	3.26762e-09	26	0.769179
Firmicutes_306755	1.95961	3.27152	0.0330173	0.981469	1.36873e-13	23.66	0.767821
Firmicutes_166689	2.16308	2.10352	0.162871	0.910139	9.79532e-09	26	0.760353
Firmicutes_356360	2.06228	1.82018	0.178378	0.878977	1.80126e-07	26	0.760353
Firmicutes_196100	2.03924	1.85057	0.167425	0.883582	5.4639e-07	26	0.758995
Firmicutes_519970	2.05722	3.43158	0.039172	0.98776	0	25.52	0.75628
Firmicutes_4390863	2.07544	2.8553	0.0704566	0.958403	6.96263e-13	26	0.75628
Firmicutes_368236	1.70503	1.54509	0.112115	0.838988	3.04751e-06	26	0.754922
Firmicutes_847711	1.84899	3.37931	0.0188118	0.984199	3.39728e-15	24.16	0.754922
Firmicutes_183824	1.83721	1.38578	0.186618	0.832426	1.363e-05	26	0.752206
Firmicutes_4307330	2.12064	2.66774	0.0924276	0.957478	3.88323e-13	26	0.751527
Firmicutes_185113	1.74235	1.4506	0.14136	0.825293	6.23575e-05	26	0.750849
Firmicutes_184000	2.25326	1.87785	0.221667	0.889906	4.7135e-08	26	0.75017
Firmicutes_537219	2.10893	2.53291	0.101659	0.942519	4.8957e-11	26	0.748812
Firmicutes_4453976	2.10093	2.30202	0.12344	0.922944	4.94734e-08	26	0.746775
Tenericutes_266198	1.92306	3.12855	0.0339553	0.975744	4.41869e-16	25.72	0.746096
Firmicutes_185734	1.81343	1.24369	0.210176	0.820443	4.7713e-05	26	0.744739
Firmicutes_184882	2.11609	2.29415	0.127813	0.926226	1.00548e-08	26	0.74406
Firmicutes_4459940	1.86904	2.53409	0.0550899	0.947357	1.9761e-11	26	0.742023
Firmicutes_519880	2.2365	2.50898	0.13085	0.945379	3.58405e-09	26	0.741344
Bacteroidetes_4030375	2.30043	1.24322	0.377282	0.816918	9.30901e-06	26	0.741344
Firmicutes_177593	1.77747	2.49692	0.0410447	0.935313	1.54552e-10	26	0.740665
Firmicutes_329597	2.06369	1.69343	0.201125	0.863423	6.18045e-07	26	0.739308
Firmicutes_177379	1.9874	3.48505	0.0293405	0.988711	1.15463e-16	22.62	0.738629
Firmicutes_195185	2.02837	3.37445	0.0377075	0.9861	3.55271e-17	25.48	0.738629
Firmicutes_4412022	2.1319	2.78862	0.0853337	0.955907	1.90402e-11	26	0.73795
Firmicutes_4401692	1.99773	3.52231	0.029365	0.990355	0	23.96	0.73795
Firmicutes_185584	1.66741	1.4054	0.121041	0.827069	3.241e-05	26	0.73795
Firmicutes_4433737	1.84106	1.86942	0.108113	0.87292	3.81701e-06	26	0.737271
Firmicutes_129401	2.05034	2.65561	0.079896	0.95211	3.92299e-11	26	0.735913
Actinobacteria_4411138	2.30638	2.44141	0.154135	0.971734	1.25677e-15	25.98	0.734555
Firmicutes_195494	2.34791	1.9595	0.230617	0.902601	9.33464e-09	26	0.734555
Firmicutes_170640	1.89867	3.40545	0.0227479	0.987231	8.88178e-18	24.52	0.732519
Firmicutes_851715	2.01642	3.26496	0.0403567	0.982619	8.88178e-18	25.56	0.732519
Firmicutes_175168	1.65888	1.8602	0.0617955	0.893794	7.7541e-07	26	0.732519
Firmicutes_195548	1.74799	1.51174	0.131886	0.85831	1.19266e-05	26	0.730482
Actinobacteria_1134896	1.99944	3.55009	0.0287831	0.990949	4.44089e-18	24.02	0.730482
Firmicutes_180640	1.71936	1.27073	0.166499	0.818317	4.87343e-05	26	0.728445
Firmicutes_1943669	1.86493	1.6959	0.140001	0.881146	2.72704e-07	26	0.727088
Firmicutes_292456	1.96325	1.75594	0.159834	0.853775	1.45843e-06	26	0.725051
Firmicutes_839684	2.11388	2.61	0.0958512	0.94738	7.23494e-12	26	0.725051
Firmicutes_4434203	1.81241	1.84766	0.103258	0.872947	1.23383e-06	26	0.723693
Firmicutes_105287	1.77125	1.3718	103.837	0.818328	0.000669899	26	0.720978
Proteobacteria_4452118	1.92731	3.39885	0.0257465	0.987106	8.88178e-18	24.36	0.716904
Firmicutes_151870	2.14298	2.80785	0.0856986	0.961486	7.24465e-14	26	0.710794
Firmicutes_258099	2.02172	1.78978	0.171835	0.885605	5.45556e-08	26	0.7074
Actinobacteria_1011712	1.97856	3.09266	0.042749	0.975106	9.81437e-16	25.8	0.704005
Firmicutes_535399	1.81326	1.80863	0.107819	0.878055	1.7338e-07	26	0.704005
Firmicutes_290284	2.11572	3.20143	0.0568602	0.979656	7.34968e-16	25.9	0.70129
Bacteroidetes_197490	1.56163	1.24388	0.111394	0.822219	8.72518e-05	26	0.699253
Firmicutes_69664	1.9918	3.17413	0.0409121	0.978478	4.68514e-16	25.72	0.699253
Firmicutes_292962	2.07064	3.31572	0.0453361	0.983639	1.11022e-16	25.64	0.698574
Firmicutes_4397439	1.99964	3.62387	0.0267342	0.991674	0	22.92	0.697217
Firmicutes_785522	1.96743	3.33919	0.0319196	0.985827	4.44089e-18	25.56	0.693143
Firmicutes_610842	1.9088	3.34617	0.0252987	0.984562	2.81997e-16	24.24	0.687033
Firmicutes_113581	2.01611	3.55035	0.030488	0.990741	0	24.34	0.686354
Proteobacteria_252773	2.07773	3.52161	0.038164	0.989251	0	24.96	0.684997
Firmicutes_195028	2.38409	2.83263	0.128977	0.968366	2.74603e-14	26	0.684997
Firmicutes_688800	1.68016	2.30489	0.0354452	0.930765	3.12716e-09	26	0.682281
Firmicutes_760544	1.90403	2.72589	0.049687	0.952929	5.302e-12	25.96	0.680923
Firmicutes_309892	1.96625	1.93623	0.134116	0.886228	5.78159e-06	26	0.680244
Firmicutes_869796	1.99674	3.36407	0.0344148	0.984535	4.44089e-18	25.26	0.679566
Proteobacteria_9912	2.06287	1.91436	0.163982	0.897668	8.60032e-08	26	0.679566
Proteobacteria_4360511	2.08795	3.17613	0.0541573	0.979409	6.21725e-17	25.96	0.678887
Firmicutes_4416951	2.36011	2.93483	0.115453	0.973915	7.77156e-16	25.98	0.678208
Proteobacteria_300200	1.97693	1.91248	0.14009	0.883825	4.96473e-08	26	0.677529
Firmicutes_847934	1.61915	1.65372	0.0720569	0.862221	7.66431e-07	26	0.67685
Proteobacteria_295094	1.92579	3.68705	0.0186998	0.993699	6.91891e-15	20.02	0.67685
Proteobacteria_4417470	2.07832	2.54488	0.0944066	0.947226	4.07018e-11	26	0.673456
Firmicutes_114929	1.95595	3.53035	0.0249721	0.991394	4.44089e-18	23.9	0.673456
Firmicutes_209845	2.13978	2.13519	0.15212	0.908873	3.22574e-09	26	0.672777
Firmicutes_175037	1.93561	2.61933	0.0611668	0.944905	2.91574e-11	25.98	0.67074
Firmicutes_45363	2.05124	3.31043	0.0431527	0.984786	0	25.68	0.670061
Firmicutes_515299	1.92621	3.5563	0.0216149	0.991533	1.53211e-16	23.08	0.669382
Firmicutes_231952	1.78918	1.6436	0.123728	0.86338	4.77929e-07	26	0.666667
Firmicutes_1103499	1.98356	3.45056	0.0300593	0.988853	8.88178e-18	24.6	0.659199
Bacteroidetes_769961	2.39111	1.89639	0.254373	0.89682	2.79599e-08	26	0.657162
Firmicutes_194526	1.97136	2.39045	0.0853356	0.918795	7.38718e-10	26	0.653089
Firmicutes_4133116	2.06719	3.34746	0.0434315	0.983409	6.66134e-18	25.32	0.651052
Firmicutes_963239	2.04172	3.07285	0.0524566	0.976364	2.44382e-14	25.8	0.651052
Firmicutes_232828	1.6863	1.80377	0.0743789	0.865916	1.35216e-05	26	0.649016
Firmicutes_187144	2.07763	2.52129	0.0962999	0.939171	5.21496e-11	26	0.649016
Firmicutes_149437	2.33212	2.71918	0.129315	0.956401	2.03502e-13	26	0.648337
Firmicutes_1098434	1.99674	3.53893	0.0288001	0.990852	0	24.52	0.647658
Firmicutes_178474	1.63344	1.61147	0.0801416	0.85457	1.03505e-05	26	0.646979
Firmicutes_332784	1.92777	3.23695	0.0305554	0.981224	2.23155e-15	23.3	0.644942
Firmicutes_183932	2.01479	3.02623	0.0508134	0.972607	5.68878e-15	25.9	0.643585
Firmicutes_290974	1.85035	2.36766	0.0622522	0.926213	5.84801e-10	26	0.643585
Firmicutes_208539	2.25335	2.35525	0.152011	0.933142	1.49128e-10	26	0.641548
Firmicutes_289474	2.03707	3.52906	0.0333127	0.988082	1.33227e-17	24.1	0.639511
Firmicutes_174473	1.57194	1.60918	0.0623005	0.880464	2.87343e-07	26	0.638832
Firmicutes_1848900	1.68664	1.56148	0.102525	0.860932	1.22478e-06	26	0.636117
Firmicutes_190502	2.15407	2.35023	0.129896	0.929483	7.56354e-10	26	0.636117
Proteobacteria_4354477	1.4496	1.18583	0.077163	0.855878	7.07229e-06	26	0.636117
Firmicutes_193163	1.69873	1.57023	0.105457	0.862002	1.61537e-06	26	0.636117
Firmicutes_366161	1.76167	1.3365	0.168997	0.837078	4.9035e-06	26	0.632722
Firmicutes_4404459	1.95252	3.41821	0.0276906	0.986924	1.31006e-16	23.24	0.631365
Fusobacteria_4449244	2.04929	3.65254	0.0308294	0.991221	0	23.4	0.630686
Firmicutes_287539	2.14033	3.32685	0.0541086	0.982867	0	25.8	0.62797
Actinobacteria_137183	1.96704	3.28229	0.0337077	0.984544	3.9968e-17	25.7	0.62797
Firmicutes_174300	1.92938	1.81496	0.140465	0.879396	4.96506e-08	26	0.626612
Firmicutes_35260	1.97231	3.55195	0.0259688	0.991122	0	23.38	0.619823
Firmicutes_3942348	1.9796	3.72868	0.0222728	0.995001	2.86438e-16	20.46	0.613714
Firmicutes_842786	1.86891	2.36003	0.0665435	0.921025	7.32426e-10	26	0.613035
Bacteroidetes_851634	2.09192	2.9608	0.0664129	0.969326	8.63132e-14	25.98	0.613035
Firmicutes_845444	1.87695	2.23153	0.0788304	0.908277	2.85631e-07	26	0.613035
Firmicutes_187051	1.78727	1.68604	0.116607	0.8684	7.11554e-07	26	0.612356
Firmicutes_110462	1.95161	3.62099	0.0222903	0.99184	1.90314e-14	20.36	0.612356
Firmicutes_354908	1.83339	2.00995	0.0896942	0.895373	5.93412e-08	26	0.611677
Firmicutes_363997	2.07333	3.13906	0.0537627	0.975289	6.86118e-16	25.86	0.610319
Actinobacteria_542066	1.96631	3.63478	0.0233729	0.99307	9.99201e-17	21.82	0.608282
Firmicutes_340642	2.01374	2.57498	0.0788823	0.943307	5.27836e-11	26	0.607604
Actinobacteria_955102	2.03435	3.2644	0.0426577	0.980892	6.21725e-17	25.54	0.607604
Firmicutes_4322275	2.04489	3.60301	0.0318541	0.989664	0	23.78	0.606925
Firmicutes_4466275	1.77843	2.48366	0.0422278	0.93622	8.43786e-11	25.98	0.606925
Actinobacteria_4413347	2.24889	2.61377	0.122688	0.947374	5.57126e-12	26	0.604888
Bacteroidetes_3084481	1.88108	2.3451	0.0702331	0.920708	2.7891e-09	25.98	0.604209
Firmicutes_362470	1.90347	3.14273	0.0310405	0.97623	4.09228e-15	25.5	0.60353
Firmicutes_102471	2.257	2.75738	0.11121	0.956392	4.05345e-12	26	0.601494
Firmicutes_181452	1.71374	1.55059	0.112885	0.863583	4.57303e-06	26	0.599457
Firmicutes_524444	2.05224	3.00225	0.0577642	0.972203	4.89608e-15	25.92	0.598099
Bacteroidetes_4029584	1.45894	1.33394	0.0607648	0.849983	3.2052e-06	26	0.595384
Firmicutes_335670	1.97713	1.93441	0.13662	0.893653	5.28624e-08	26	0.595384
Bacteroidetes_199534	2.39241	2.79624	0.133584	0.957986	2.88811e-13	26	0.594026
Firmicutes_578437	1.91803	3.50791	0.0220311	0.990058	1.05693e-15	23.36	0.594026
Firmicutes_269913	2.04155	3.14607	0.0487499	0.978507	1.08802e-16	25.46	0.593347
Proteobacteria_4434564	1.95483	3.64664	0.0219871	0.994067	1.11022e-16	22.28	0.592668
Proteobacteria_4477719	1.99263	3.76106	0.0226737	0.995749	4.44089e-18	20.32	0.591989
Firmicutes_4362337	2.00851	3.04206	0.0491961	0.970442	8.95772e-14	25.72	0.59131
Firmicutes_188856	1.93516	1.75887	0.14976	0.867605	5.73787e-07	26	0.589274
Firmicutes_528692	2.16379	2.57154	0.109158	0.944938	1.8282e-11	26	0.588595
Firmicutes_189820	1.84875	2.26173	0.0700299	0.920162	4.99433e-09	26	0.588595
Firmicutes_4477017	2.14114	2.71193	0.0926333	0.953409	4.52289e-12	25.98	0.587916
Firmicutes_4453535	2.57563	2.41066	0.215793	0.938662	3.44442e-11	26	0.587916
Firmicutes_187248	2.16075	2.85713	0.0851828	0.961227	4.99616e-13	25.98	0.587237
Proteobacteria_4434188	1.98525	3.54878	0.0274041	0.991587	1.33227e-17	24.18	0.585879
Bacteroidetes_158967	2.02613	3.73018	0.0264352	0.993486	1.40887e-14	21.42	0.580448
Firmicutes_192438	2.28427	2.40911	0.152029	0.925667	4.35813e-10	26	0.579769
Actinobacteria_4335781	2.13712	2.89869	0.0780593	0.964466	4.87979e-13	25.98	0.578411
Bacteroidetes_1749791	1.85233	1.40016	0.190109	0.848813	1.49213e-05	26	0.577733
Actinobacteria_188966	2.15349	2.1918	0.148399	0.904544	2.21479e-08	26	0.577733
Firmicutes_298788	1.98763	3.43744	0.0308855	0.985842	1.92069e-15	24.42	0.577054
Firmicutes_3438642	2.39694	2.83915	0.130709	0.968825	1.8594e-14	26	0.576375
Bacteroidetes_4372511	2.34949	2.73764	0.131112	0.959207	1.46856e-13	26	0.574338
Firmicutes_339988	1.73854	1.98918	0.0684183	0.892298	9.49049e-08	26	0.574338
Firmicutes_4311620	1.79446	2.52451	0.0422838	0.941742	2.61326e-10	26	0.57298
Firmicutes_174885	2.0326	2.549	0.0843789	0.936025	5.55386e-11	25.98	0.572301
Firmicutes_189936	1.8387	2.49324	0.051755	0.944402	8.92371e-11	25.96	0.571623
Firmicutes_2182669	1.95034	3.24295	0.0330893	0.981945	3.10862e-17	25.42	0.570944
Bacteroidetes_4469722	2.43441	1.92924	0.258436	0.876572	1.94376e-07	26	0.570265
Lentisphaerae_577380	1.89558	3.51134	0.0199136	0.990444	1.77636e-17	23.06	0.568228
Firmicutes_3398150	1.93658	3.53303	0.0230734	0.990988	0	23.86	0.568228
Firmicutes_180414	1.89776	1.82188	0.130347	0.87384	1.28659e-05	26	0.566191
Firmicutes_194089	1.86288	1.93211	0.105845	0.894111	7.3978e-08	26	0.564834
Bacteroidetes_2063400	1.95458	1.8624	0.140166	0.885958	3.19109e-08	26	0.564155
Proteobacteria_810785	2.26251	2.22862	0.169862	0.916334	3.87373e-09	26	0.562118
Firmicutes_181140	1.70744	1.70438	0.089965	0.883507	9.37452e-08	26	0.558724
Firmicutes_198420	1.70755	1.40652	0.135309	0.849027	2.50104e-06	26	0.558724
Bacteroidetes_181539	1.91309	2.93726	0.0403714	0.96624	1.73785e-13	25.82	0.558045
Bacteroidetes_4481719	2.23172	1.87383	0.216841	0.88345	1.0162e-06	26	0.558045
Firmicutes_4414489	2.03523	3.65942	0.0292345	0.990875	1.01181e-13	21.8	0.557366
Firmicutes_1986406	1.78636	2.36512	0.0501371	0.932674	5.89353e-10	25.98	0.553971
Firmicutes_158222	2.0972	3.13513	0.0574676	0.97304	1.76081e-15	25.78	0.552614
Firmicutes_189793	1.9983	2.81929	0.0595788	0.956758	2.53426e-12	25.96	0.552614
Firmicutes_801844	2.21165	2.79189	0.0995598	0.956218	4.54505e-13	26	0.551935
Firmicutes_178183	2.11755	2.38072	0.11819	0.926509	3.80349e-10	26	0.551256
Firmicutes_198754	1.77723	2.40029	0.0462711	0.92615	3.26406e-09	26	0.550577
Firmicutes_181074	2.12415	2.77446	0.0845159	0.960839	6.87073e-14	25.98	0.549219
Firmicutes_233052	1.72942	2.41529	0.0372993	0.933401	4.00848e-10	25.96	0.549219
Firmicutes_563803	2.0521	3.14346	0.0505177	0.97481	6.63025e-15	25.72	0.547862
Firmicutes_4380039	2.27085	2.13816	0.183668	0.904432	8.10824e-09	26	0.547183
Firmicutes_352604	1.75798	2.31411	0.0478648	0.922531	9.44952e-10	25.98	0.547183
Firmicutes_2338105	2.72787	2.14122	0.288207	0.91785	5.67752e-10	26	0.546504
Firmicutes_195186	2.2673	2.42817	0.146047	0.925969	2.73075e-10	26	0.546504
Firmicutes_4315786	1.99863	3.42646	0.0324366	0.986651	2.22045e-18	25.1	0.545825
Firmicutes_259604	2.08482	3.01846	0.0618777	0.972255	5.3757e-15	25.98	0.543788
Firmicutes_188225	2.04738	2.7123	0.0749782	0.950015	4.43518e-11	25.98	0.54243
Proteobacteria_4368600	2.03079	1.93895	0.150973	0.888415	1.9913e-06	26	0.537678
Firmicutes_4392487	1.90365	1.74272	0.143607	0.876029	7.50548e-07	26	0.53632
Firmicutes_211354	1.94697	2.72822	0.0562451	0.954225	3.73692e-12	26	0.534284
Firmicutes_555547	1.72736	1.72634	0.0926104	0.867784	2.79248e-07	26	0.532247
Firmicutes_184178	1.91564	2.49476	0.0656483	0.938917	8.87316e-11	25.92	0.528174
Firmicutes_529940	1.45652	1.25938	108.204	0.840065	0.000263711	26	0.528174
Firmicutes_4464065	2.05521	3.01998	0.0572251	0.965924	2.64588e-13	25.96	0.527495
Firmicutes_585869	1.96775	3.49355	0.0271574	0.98909	3.55271e-17	24.22	0.526816
Firmicutes_269532	2.07737	2.95891	0.064035	0.96852	1.55964e-14	25.92	0.526816
Firmicutes_523768	1.48396	1.27086	0.0741723	0.86363	9.86282e-07	26	0.522743
Firmicutes_158836	2.1104	2.67193	0.0897997	0.946609	3.2274e-11	26	0.522743
Firmicutes_4429536	2.10163	2.55463	0.0976904	0.945353	6.85283e-12	26	0.522064
Bacteroidetes_4343580	2.01624	1.38273	0.251194	0.825991	1.75616e-05	26	0.518669
Firmicutes_4424239	2.49597	2.73498	0.160061	0.958571	1.24953e-13	26	0.518669
Bacteroidetes_99322	1.99657	3.50198	0.0297942	0.986478	2.53575e-15	21.68	0.514596
Bacteroidetes_194670	1.67758	1.76802	0.0735975	0.879266	3.05631e-07	26	0.513917
Firmicutes_805672	1.961	3.08666	0.0404017	0.9741	2.76223e-15	25.74	0.513238
Bacteroidetes_1784461	2.18038	2.36789	0.133693	0.93364	4.39e-11	26	0.512559
Firmicutes_187038	1.94778	1.98642	0.121926	0.897034	1.7866e-07	26	0.511202
Bacteroidetes_295554	1.8517	2.90947	0.0331735	0.961795	9.0743e-14	25.74	0.509844
Firmicutes_177024	1.87481	3.44968	0.0194563	0.986394	1.05471e-15	22.44	0.509165
Firmicutes_189679	1.86197	2.05803	0.0912415	0.906143	5.31719e-08	26	0.509165
Firmicutes_251970	1.93404	2.37362	0.0787029	0.919862	6.94638e-10	26	0.507128
Firmicutes_4315787	1.94163	3.08814	0.0378184	0.970746	3.74456e-14	25.78	0.506449
Firmicutes_17311	1.80188	2.29597	0.0573603	0.927427	3.63435e-08	26	0.505092
Firmicutes_288780	1.92737	3.25994	0.0298727	0.980669	6.88338e-17	25.48	0.505092
Firmicutes_278928	1.97437	2.45215	0.0803951	0.934099	1.0894e-10	25.98	0.505092
Firmicutes_188316	1.5932	1.60935	0.0676715	0.870184	0.000142315	26	0.504413
Firmicutes_4327141	1.79768	1.51964	0.145094	0.850862	2.36948e-06	26	0.503734
Firmicutes_355938	1.90208	1.87426	0.123494	0.884708	2.02292e-08	26	0.503055
Firmicutes_3648884	2.05049	2.19723	0.122243	0.913259	9.95001e-10	26	0.503055
Firmicutes_149120	1.9954	3.18376	0.0409246	0.974985	3.43281e-15	25.8	0.503055
Firmicutes_178760	1.61762	1.61023	0.0737014	0.855151	1.38088e-06	26	0.502376
Firmicutes_196139	1.98247	2.05432	0.1223	0.897423	8.45387e-08	26	0.501697
Firmicutes_362854	2.00154	3.58508	0.0279748	0.989597	3.10862e-17	23.2	0.500339
Firmicutes_240694	1.96157	3.48357	0.0267573	0.988512	0	23.94	0.499661
Firmicutes_4418016	2.0143	3.18212	0.0434823	0.97905	3.06422e-16	25.62	0.499661
Firmicutes_187385	1.84	1.78923	0.117639	0.887565	3.59422e-07	26	0.496945
Firmicutes_157516	1.98038	2.15544	0.109741	0.909714	9.57543e-10	26	0.496266
Firmicutes_183680	2.10274	1.69446	0.21021	0.846629	5.92127e-05	26	0.495587
Proteobacteria_806487	2.0376	3.71658	0.0278794	0.99287	2.13163e-16	21.62	0.495587
Firmicutes_579541	1.93829	3.17153	0.0342214	0.97954	2.90878e-16	25.5	0.495587
Tenericutes_941087	1.97173	3.70658	0.0220865	0.994719	9.10383e-17	20.54	0.494908
Firmicutes_33112	1.84087	3.26425	0.0207809	0.981817	1.06581e-15	24.3	0.493551
Firmicutes_1620998	1.97898	3.22243	0.0372544	0.978703	6.15064e-16	25.04	0.492193
Bacteroidetes_158581	2.45339	2.70956	0.154104	0.940898	3.29271e-11	26	0.491514
Bacteroidetes_193534	1.8265	2.16857	0.0722645	0.914354	1.84984e-08	26	0.490835
Firmicutes_330566	2.00754	3.71737	0.0250311	0.992957	9.23706e-16	20.24	0.490156
Firmicutes_4144206	1.96583	3.57394	0.0247867	0.990719	2.22045e-16	22.76	0.490156
Bacteroidetes_3671383	2.26556	1.7216	0.252198	0.856958	1.73334e-06	26	0.490156
Firmicutes_185558	2.15834	2.64788	0.101209	0.945556	9.36533e-12	25.98	0.489477
Proteobacteria_4227110	2.03335	3.40979	0.0369817	0.986541	4.44089e-18	25.4	0.489477
Firmicutes_619140	2.01895	3.43414	0.0344209	0.985701	1.33227e-17	24.82	0.489477
Firmicutes_183071	1.76328	1.60198	0.121412	0.857873	9.88445e-07	26	0.488119
Firmicutes_4387246	1.97002	2.50315	0.0755438	0.933887	2.40276e-10	26	0.487441
Firmicutes_176785	1.70015	2.46374	0.030307	0.93457	7.93343e-09	25.9	0.486083
Proteobacteria_4250206	2.08499	3.34384	0.0458624	0.981806	1.55431e-17	25.56	0.486083
Firmicutes_4349518	1.95187	3.35728	0.0294426	0.985898	0	24.44	0.482688
Firmicutes_177503	1.58789	1.78996	0.0489979	0.894687	1.29253e-07	26	0.482688
Firmicutes_310979	1.64709	1.8348	0.0592416	0.896159	1.37094e-07	26	0.48201
Firmicutes_13986	2.00379	2.73589	0.0653865	0.952103	5.94456e-12	26	0.479294
Bacteroidetes_220679	1.78888	1.67732	0.117368	0.864665	6.07215e-07	26	0.478615
Firmicutes_179989	2.1122	3.07708	0.0628209	0.969178	3.51497e-15	26	0.477257
Firmicutes_197540	1.68727	2.45889	0.0284111	0.948358	2.05697e-11	25.94	0.476578
Firmicutes_191975	1.92834	3.1141	0.0350163	0.975146	4.84945e-15	25.34	0.476578
Firmicutes_840961	1.90271	3.1489	0.0307303	0.975456	1.96376e-14	25.5	0.475221
Proteobacteria_4389289	1.96105	2.20224	0.100733	0.909769	3.98757e-09	26	0.473863
Firmicutes_1835985	1.79623	2.1771	0.0648974	0.906658	1.78451e-08	26	0.473184
Firmicutes_188690	2.68288	2.40405	0.238508	0.924399	1.52704e-10	26	0.471826
Firmicutes_4454027	2.0418	3.20988	0.0459398	0.978638	1.75415e-16	25.66	0.470468
Firmicutes_185088	1.53816	1.5426	0.0575076	0.885101	3.48929e-07	26	0.470468
Firmicutes_2498994	2.2434	2.62661	0.1202	0.947445	8.18764e-12	26	0.469111
Bacteroidetes_4483570	2.08608	2.23628	0.126368	0.916125	3.36795e-08	26	0.468432
Actinobacteria_2472603	2.02357	3.40798	0.0358548	0.984507	1.28786e-16	24.76	0.468432
Firmicutes_4473664	1.91004	3.06929	0.0344386	0.974891	2.31148e-15	25.6	0.467753
Firmicutes_198814	1.89364	3.37036	0.0230949	0.986312	5.10703e-17	23.88	0.465037
Actinobacteria_109591	2.01689	3.65182	0.0276233	0.99081	5.10703e-17	22.88	0.462322
Firmicutes_451449	1.99386	3.23309	0.0387645	0.977637	6.4615e-16	25.36	0.462322
Firmicutes_1028501	1.96504	3.35128	0.0311027	0.982487	2.81997e-16	24.8	0.460285
Firmicutes_169364	1.89996	2.27837	0.0793159	0.917758	2.56876e-07	26	0.458927
Firmicutes_295938	1.8851	2.15076	0.0877182	0.914118	1.00975e-08	26	0.456891
Firmicutes_110296	1.95053	3.48755	0.025545	0.987477	1.28786e-16	22.9	0.455533
Actinobacteria_1017181	2.27655	2.15386	0.183142	0.902282	2.89354e-08	26	0.454854
Bacteroidetes_194646	1.91724	3.5333	0.0213329	0.990001	1.62981e-15	21.96	0.454175
Firmicutes_767863	2.02099	3.01842	0.052015	0.969448	7.93143e-15	25.86	0.453496
Firmicutes_194373	2.0316	2.94523	0.0575742	0.962786	9.28191e-14	25.9	0.452138
Firmicutes_4365141	2.00107	3.35057	0.035233	0.98227	8.21565e-17	25.06	0.452138
Firmicutes_157162	1.64239	1.98307	0.0461561	0.9039	7.08789e-07	26	0.450781
Firmicutes_2704013	1.73874	2.30122	0.0450906	0.927291	1.21961e-09	26	0.447386
Bacteroidetes_193859	1.88963	2.24805	0.079659	0.915058	2.16952e-09	26	0.446707
Firmicutes_172233	1.44433	1.53234	0.0356518	0.890102	5.24508e-06	26	0.444671
Firmicutes_4465905	2.03792	2.52477	0.0873221	0.933024	1.61925e-09	26	0.443992
Bacteroidetes_4321001	2.25322	2.39802	0.146569	0.958782	8.72377e-10	26	0.443992
Firmicutes_195358	2.19347	2.50248	0.121822	0.933148	4.09567e-11	26	0.443313
Firmicutes_817995	1.61077	2.25147	0.0260809	0.937735	1.91588e-09	26	0.442634
Firmicutes_1061772	2.14966	2.76033	0.0902484	0.957236	4.59834e-13	25.94	0.441276
Firmicutes_172878	1.95289	3.21953	0.0342273	0.977314	1.06581e-15	25.4	0.439919
Firmicutes_44151	1.80661	2.0609	0.077095	0.900993	4.52595e-08	26	0.438561
Firmicutes_4352349	1.96527	3.3451	0.031276	0.981336	7.22437e-12	22.9	0.438561
Bacteroidetes_4426972	1.8809	3.4021	0.0211599	0.988046	5.08482e-16	23.56	0.437882
Firmicutes_183783	1.76149	1.81606	0.0909482	0.878853	7.35662e-07	26	0.435166
Firmicutes_4343184	1.74318	1.89504	0.0776244	0.907026	1.74759e-07	26	0.430414
Firmicutes_113003	1.48536	1.36597	0.0605965	0.879678	7.21408e-07	26	0.429056
Firmicutes_296872	2.05027	2.7599	0.0718309	0.954911	4.15745e-12	25.94	0.429056
Firmicutes_525387	1.76049	2.94644	0.0210319	0.971755	8.58202e-15	25.58	0.428377
Firmicutes_4371341	1.97925	3.28056	0.0351104	0.981246	6.17284e-16	25.2	0.427699
Firmicutes_4432154	2.23584	2.82447	0.101229	0.953324	3.20527e-12	26	0.42702
Firmicutes_176954	1.93916	1.9177	0.128542	0.879394	1.09644e-07	26	0.426341
Firmicutes_308157	1.97554	3.1447	0.0398463	0.975613	2.88436e-15	25.46	0.424304
Firmicutes_4335229	1.85813	2.68646	0.0439606	0.952822	5.14466e-12	25.96	0.424304
Firmicutes_1132942	1.94591	3.56182	0.0232096	0.990373	2.66454e-17	22.64	0.422946
Proteobacteria_4417158	2.35973	2.67536	0.138898	0.937132	6.13423e-11	26	0.422267
Firmicutes_197481	1.50409	1.47177	0.0551869	0.874041	4.16626e-07	26	0.422267
Firmicutes_4474844	2.00095	2.59091	0.0749091	0.933991	1.82295e-10	26	0.422267
Actinobacteria_181468	1.87182	3.43277	0.0195968	0.985279	2.54685e-15	22.82	0.42091
Firmicutes_4372581	1.52917	1.45656	0.0647929	0.864142	4.13224e-06	26	0.420231
Bacteroidetes_158711	2.22	2.15638	0.169248	0.903364	6.38172e-09	26	0.419552
Firmicutes_4397708	1.93512	3.35713	0.0277015	0.98435	1.09246e-15	24.14	0.417515
Firmicutes_182647	1.99371	2.86601	0.0557897	0.962906	6.92044e-13	25.96	0.416836
Firmicutes_177188	1.86953	1.93066	0.106808	0.888471	5.34158e-08	26	0.416836
Firmicutes_4303851	1.87217	2.88559	0.0367265	0.963177	2.4057e-13	25.72	0.416158
Firmicutes_3746307	1.90276	3.36276	0.0242068	0.985138	2.66454e-17	24.38	0.414121
Firmicutes_165257	1.9313	3.0133	0.0393471	0.969936	2.06901e-14	25.64	0.413442
Firmicutes_4474951	2.01644	2.99808	0.0523645	0.96777	5.18852e-14	25.84	0.413442
Firmicutes_174747	2.28876	2.57464	0.134441	0.933987	6.67085e-11	26	0.412763
Bacteroidetes_216550	1.91696	3.56498	0.0205329	0.991365	8.21565e-17	21.58	0.412084
Firmicutes_1007750	1.97515	3.2862	0.0344366	0.982055	3.33067e-17	25.16	0.410048
Bacteroidetes_4333921	1.73664	2.9082	0.0195085	0.970044	2.55571e-13	25.16	0.409369
Proteobacteria_3228684	2.14901	3.15114	0.0642571	0.973382	1.88738e-15	25.8	0.40869
Firmicutes_166637	1.94519	3.12501	0.0367524	0.974847	4.89608e-15	25.56	0.40869
Firmicutes_179625	1.64431	1.88528	0.0538223	0.895883	7.07057e-08	26	0.408011
Firmicutes_215468	1.64171	2.06658	0.0405675	0.914894	1.53163e-08	25.98	0.408011
Firmicutes_297045	2.01822	3.10878	0.0472006	0.972248	3.93463e-15	25.72	0.407332
Firmicutes_361581	1.56515	1.50114	0.0699219	0.871214	1.4459e-05	26	0.405295
Bacteroidetes_1142687	1.77317	1.14305	0.221464	0.808468	1.44641e-05	26	0.405295
Firmicutes_25842	1.96311	3.61949	0.0234089	0.990188	3.59712e-15	21.3	0.405295
Firmicutes_321825	1.94088	3.63559	0.021035	0.99205	5.55112e-17	21.02	0.405295
Fusobacteria_4405869	2.42245	2.50879	0.170258	0.927625	4.09634e-10	26	0.405295
Firmicutes_521792	1.74245	2.25094	0.0484854	0.932485	4.43971e-10	26	0.404616
Firmicutes_185542	1.61068	1.6526	0.0669672	0.889639	5.45957e-06	26	0.403938
Firmicutes_4480189	2.05415	3.30419	0.0435117	0.979961	3.55271e-17	25.54	0.403938
Proteobacteria_239362	2.01353	3.75941	0.0245419	0.994592	0	21.56	0.40258
Firmicutes_311704	2.15982	3.01794	0.0738088	0.962414	8.43769e-14	25.96	0.40258
Firmicutes_3980364	1.90478	3.55475	0.0197499	0.989266	4.96558e-14	20.34	0.401222
Bacteroidetes_2902741	1.46253	1.34042	0.0570321	0.863836	6.798e-06	26	0.400543
Firmicutes_146086	1.95095	3.09747	0.0385424	0.972214	1.73928e-14	25.72	0.400543
Firmicutes_174589	1.65505	1.6394	0.0807319	0.873288	2.09399e-07	26	0.399864
Firmicutes_176877	1.73609	1.86855	0.0779803	0.88564	6.88712e-08	26	0.399864
Firmicutes_186389	1.81671	2.0687	0.0787552	0.902534	1.08464e-07	26	0.399864
Actinobacteria_235127	1.87477	3.39842	0.0206346	0.987309	3.07088e-15	23.34	0.399185
Firmicutes_176173	2.08811	3.06696	0.0595484	0.967348	1.81766e-14	25.82	0.398506
Firmicutes_4334844	1.95311	3.66475	0.0214106	0.992924	9.30367e-16	20.86	0.397828
Firmicutes_2420187	1.97775	3.31029	0.0339453	0.980417	9.32587e-16	24.9	0.397828
Firmicutes_181161	1.58571	2.00064	0.0336601	0.924987	3.06841e-09	26	0.39647
Firmicutes_180974	1.769	2.66457	0.0313951	0.957317	2.63819e-12	25.88	0.395791
Firmicutes_181689	1.82714	2.37295	0.0567161	0.931398	4.7422e-10	26	0.395112
Firmicutes_188707	2.08351	2.25915	0.122477	0.906166	4.8375e-09	26	0.395112
Firmicutes_4466220	1.81663	2.69792	0.0370678	0.95473	6.92977e-12	25.84	0.395112
Firmicutes_194733	1.5253	1.54917	0.0527164	0.880986	1.0334e-07	26	0.395112
Firmicutes_4425390	2.01601	3.33687	0.0375272	0.981515	1.82077e-16	25.22	0.393754
Bacteroidetes_4392243	2.03046	3.3783	0.0376834	0.981231	3.61933e-16	24.6	0.392396
Proteobacteria_4423331	1.90095	2.73819	0.0478729	0.954475	1.07596e-11	25.9	0.389681
Actinobacteria_132041	1.98524	2.69919	0.0644525	0.949536	2.77725e-12	25.96	0.389681
Proteobacteria_3611663	1.74131	2.17191	0.0533257	0.920266	5.16909e-07	26	0.388323
Firmicutes_192542	1.73978	1.82223	0.0843022	0.881696	1.06838e-06	26	0.386965
Firmicutes_2792266	1.93131	2.35299	0.0794507	0.933367	1.01368e-09	26	0.386286
Firmicutes_207390	1.52005	1.66275	0.0427807	0.893748	1.21215e-05	25.98	0.386286
Firmicutes_4470092	1.80021	2.08132	0.0739473	0.9098	3.26264e-08	26	0.384929
Firmicutes_182469	1.90386	3.05774	0.0339511	0.976022	5.31797e-15	24.74	0.384929
Firmicutes_311078	2.04312	2.67082	0.0766368	0.942496	2.00286e-11	26	0.384929
Firmicutes_4396248	1.89523	3.10041	0.0314974	0.972988	4.63629e-15	25.44	0.38425
Firmicutes_730939	1.87699	2.51957	0.0563173	0.944136	2.06932e-11	25.92	0.383571
Proteobacteria_4383958	1.61602	1.29013	0.119813	0.842117	3.90815e-05	26	0.382213
Firmicutes_178001	1.96057	2.06958	0.114029	0.904763	3.01341e-08	26	0.381534
Firmicutes_837512	1.9935	3.39963	0.0326708	0.984249	6.43929e-17	24.74	0.379498
Firmicutes_654307	1.94885	3.13274	0.0368755	0.971594	8.31557e-15	25.26	0.378819
Firmicutes_1099710	1.9869	3.2376	0.0376392	0.979277	1.26565e-16	25.3	0.378819
Firmicutes_177518	1.85443	2.5797	0.0487562	0.940629	1.94184e-11	25.98	0.378819
Proteobacteria_560465	1.40336	1.16024	0.0561046	0.887917	1.91421e-07	26	0.37814
Firmicutes_176757	1.73081	1.68539	0.0980291	0.878198	7.43956e-07	26	0.377461
Firmicutes_184211	1.64284	1.7698	0.063611	0.883024	2.45981e-07	26	0.376103
Firmicutes_16006	2.05975	3.00464	0.0585801	0.967019	8.53984e-15	25.92	0.376103
Firmicutes_1131759	1.91445	3.38458	0.0247868	0.985471	1.34337e-15	23.7	0.375424
Firmicutes_4468892	1.70678	1.99809	0.0591021	0.908859	5.47893e-07	25.98	0.374067
Firmicutes_4366728	2.03001	2.71464	0.0713129	0.946209	1.94145e-11	26	0.373388
Firmicutes_62513	2.0202	3.39074	0.0360577	0.983738	3.77476e-17	25.24	0.372709
Firmicutes_4369434	1.77439	2.07537	0.0680372	0.916592	9.39166e-09	26	0.372709
Firmicutes_293665	1.92981	2.8054	0.0489002	0.958923	3.24596e-13	25.86	0.372709
Firmicutes_308502	2.11894	2.89295	0.0750972	0.964553	1.32603e-13	25.92	0.37203
Firmicutes_207126	2.08396	2.55047	0.094002	0.946324	8.84895e-12	26	0.37203
Actinobacteria_4468125	1.90497	3.43102	0.0226921	0.98487	5.03664e-14	22.94	0.37203
Firmicutes_552235	1.83946	2.30022	0.0642619	0.927111	1.17764e-09	26	0.371351
Firmicutes_332778	2.2034	3.19145	0.0703886	0.972898	2.52243e-15	25.92	0.370672
Firmicutes_183855	1.55345	1.59475	0.0571694	0.883285	2.18135e-06	26	0.369993
Firmicutes_158183	2.09231	2.71675	0.0824078	0.939523	1.77047e-11	26	0.368635
Firmicutes_311370	2.02922	2.95753	0.0562801	0.963127	3.25784e-14	25.82	0.367957
Proteobacteria_4468024	2.08439	3.36845	0.0447661	0.98052	1.33227e-16	25.56	0.367957
Firmicutes_194236	1.66124	1.63532	0.0830856	0.875084	4.68536e-07	26	0.366599
Tenericutes_4343981	1.87382	3.54088	0.0174235	0.990302	1.53009e-13	20.7	0.36592
Bacteroidetes_360730	1.93691	3.40705	0.0264098	0.987349	5.10703e-17	24.3	0.36592
Firmicutes_114400	1.94572	3.14814	0.035899	0.973858	1.32339e-14	25.3	0.365241
Actinobacteria_12564	1.91231	3.07297	0.03449	0.972651	4.91385e-15	25.1	0.364562
Firmicutes_554560	1.96374	3.63821	0.0229635	0.992505	2.66454e-17	21.78	0.362525
Firmicutes_2487345	2.01114	2.56674	0.0779124	0.93471	9.72548e-11	25.98	0.362525
Bacteroidetes_287823	1.89507	2.19323	0.0853149	0.900941	3.9809e-08	26	0.361847
Firmicutes_73609	2.00727	3.32	0.0370712	0.981544	4.4853e-16	24.82	0.361847
Firmicutes_293473	1.90735	3.55583	0.0199007	0.987657	2.64082e-12	21.14	0.361168
Firmicutes_303320	1.75485	2.97815	0.0194405	0.975151	6.38378e-14	24.88	0.360489
Firmicutes_522863	2.00295	3.64455	0.0264594	0.99238	0	22.36	0.360489
Firmicutes_1105876	1.91887	3.17735	0.031588	0.978941	2.86882e-15	25.22	0.35981
Firmicutes_592913	1.75815	2.52315	0.0360885	0.95095	5.19466e-12	25.94	0.359131
Proteobacteria_236142	1.49346	1.31059	0.0704426	0.8742	2.20688e-06	26	0.358452
Firmicutes_334395	1.91692	2.77774	0.0483414	0.958041	8.58549e-13	25.9	0.358452
Firmicutes_191601	1.5974	1.55064	0.0732669	0.879346	1.072e-06	26	0.358452
Firmicutes_145883	1.59064	1.82386	0.045925	0.898548	4.06235e-07	26	0.357773
Firmicutes_4427114	1.99788	3.43638	0.0319749	0.983891	2.53131e-16	24.08	0.357094
Firmicutes_2424737	2.06237	2.62956	0.0835473	0.938272	1.05212e-10	26	0.357094
Firmicutes_851938	2.07432	2.87315	0.0686513	0.956673	2.94884e-13	25.96	0.357094
Firmicutes_328905	2.11835	2.6687	0.0910607	0.937299	5.83464e-11	25.96	0.355058
Firmicutes_181644	1.86104	2.91608	0.0339667	0.968076	4.29528e-13	25.64	0.355058
Bacteroidetes_585914	2.29259	2.85502	0.109337	0.953179	7.78626e-13	26	0.354379
Firmicutes_4475364	1.99725	3.3986	0.0331898	0.984051	6.05516e-15	24.62	0.354379
Firmicutes_198893	2.00315	3.70492	0.0249227	0.992912	4.55191e-16	20.82	0.354379
Firmicutes_294791	1.89807	2.73094	0.0477068	0.950901	2.41003e-12	25.84	0.3537
Firmicutes_1010876	1.48887	1.58671	0.0401204	0.901866	2.84733e-07	26	0.350305
Firmicutes_292633	1.92585	3.11237	0.0348102	0.974408	8.49765e-15	25.66	0.350305
Firmicutes_523577	1.95761	3.6521	0.0221078	0.99237	2.02505e-15	20.52	0.349627
Proteobacteria_4376236	1.94356	3.60231	0.0220274	0.992857	5.26246e-16	21.14	0.348948
Firmicutes_525378	2.09625	2.21874	0.130539	0.906435	6.58284e-09	26	0.346911
Firmicutes_163142	2.2085	2.78395	0.0992564	0.951167	3.70597e-12	25.92	0.346232
Firmicutes_1076818	1.84397	2.54178	0.0490863	0.935456	9.2972e-10	25.94	0.346232
Firmicutes_182864	1.82355	2.26486	0.0632755	0.920774	1.07681e-09	26	0.346232
Bacteroidetes_2731539	1.96953	2.52168	0.0738389	0.9414	2.35285e-11	25.96	0.344874
Firmicutes_4440335	1.88726	3.33707	0.0233563	0.982031	2.29505e-14	22.88	0.344874
Firmicutes_2365690	1.51902	1.22084	0.0929061	0.852312	8.39683e-06	26	0.344874
Firmicutes_2318202	2.00997	3.20272	0.0419742	0.974009	1.22125e-15	25.44	0.343517
Firmicutes_289658	1.58553	1.65327	0.0589806	0.88037	9.16588e-07	25.98	0.343517
Firmicutes_179572	1.99129	3.49075	0.0295965	0.985781	2.73115e-16	22.9	0.34148
Firmicutes_183822	1.84206	3.05057	0.0268626	0.974953	6.15419e-14	24.72	0.34148
Bacteroidetes_4374084	1.57464	1.44207	0.0794376	0.882035	1.4681e-07	26	0.340801
Firmicutes_812218	1.42115	1.45665	0.0334141	0.890268	4.20257e-07	26	0.340122
Proteobacteria_4311208	1.85672	2.69517	0.0431167	0.951685	4.47152e-12	25.96	0.340122
Firmicutes_784040	1.99441	3.27715	0.0370743	0.978685	2.70894e-16	25.44	0.339443
Firmicutes_175967	1.96021	3.63433	0.022741	0.991679	1.39444e-15	21.04	0.338764
Bacteroidetes_3970657	2.02494	3.07464	0.0497402	0.972448	1.09912e-15	25.84	0.338764
Firmicutes_2203165	1.63639	2.28332	0.028104	0.937731	5.20668e-10	25.94	0.338764
Firmicutes_4296218	1.92207	2.35434	0.076822	0.927138	2.27995e-10	25.96	0.337407
Firmicutes_759816	1.79972	2.36125	0.0522632	0.928887	1.66988e-10	25.9	0.337407
Firmicutes_665703	1.96295	3.37508	0.0300925	0.984837	3.55271e-17	24.64	0.337407
Firmicutes_182463	1.81604	2.90444	0.0285956	0.967804	1.46283e-13	25.52	0.337407
Firmicutes_85903	2.04353	3.08191	0.0520817	0.965715	3.42837e-14	25.52	0.336728
Bacteroidetes_316132	1.79601	2.27104	0.0574849	0.926795	1.61831e-10	25.98	0.336049
Firmicutes_191651	1.69976	2.19812	0.0432233	0.925118	1.88578e-09	25.96	0.336049
Firmicutes_182331	1.67537	1.85785	0.0632065	0.901758	4.90796e-08	26	0.334691
Firmicutes_322552	1.75377	1.91092	0.0781223	0.902288	6.72826e-08	25.98	0.334691
Firmicutes_308322	1.70945	2.20014	0.0450902	0.933701	1.03221e-09	25.96	0.334012
Firmicutes_1928156	1.51953	1.54381	0.0516077	0.899471	9.93249e-08	26	0.334012
Firmicutes_99566	1.69631	1.94763	0.0605415	0.895269	7.87122e-08	26	0.333333
Firmicutes_268425	1.43546	1.45279	0.0368119	0.887587	1.84136e-07	26	0.333333
Bacteroidetes_526701	1.95283	3.14251	0.0369625	0.972455	5.38236e-15	24.96	0.332654
Firmicutes_684586	1.84101	2.83538	0.0344795	0.96689	7.48934e-14	25.82	0.330618
Firmicutes_575768	1.99663	2.94759	0.0517681	0.963734	1.34837e-13	25.76	0.330618
Firmicutes_591439	1.94583	2.97166	0.0431695	0.966093	2.99094e-14	25.78	0.330618
Firmicutes_4347265	1.75634	2.18104	0.05581	0.927992	1.05491e-09	26	0.329939
Firmicutes_345986	2.03338	3.53062	0.0328675	0.985841	1.5099e-16	23.34	0.329939
Actinobacteria_465989	1.96398	3.65249	0.0227172	0.99264	1.57452e-14	20.22	0.32926
Bacteroidetes_4473972	2.16559	2.77123	0.0925101	0.961186	7.53575e-14	25.94	0.327902
Firmicutes_3352106	1.45854	1.44288	0.0437213	0.864992	1.84155e-06	26	0.327902
Bacteroidetes_4475642	2.08076	2.24844	0.123975	0.910107	2.06787e-08	26	0.327902
Firmicutes_4453060	2.00659	3.15641	0.0434232	0.976283	1.10023e-14	25.34	0.325866
Firmicutes_295835	1.93014	3.55529	0.0219313	0.990047	1.33316e-14	20.8	0.325866
Bacteroidetes_2599837	2.14988	2.50385	0.111868	0.916809	2.16039e-09	26	0.325187
Firmicutes_360660	2.06784	2.88225	0.0669289	0.958424	2.43718e-13	25.94	0.324508
Firmicutes_4423384	1.83522	1.82199	0.111019	0.878813	2.74885e-07	26	0.323829
Firmicutes_351457	1.70338	2.02785	0.0556515	0.910472	3.27869e-06	25.96	0.323829
Firmicutes_157840	1.95029	2.91249	0.0466099	0.962839	1.08367e-13	25.82	0.32315
Firmicutes_1101672	1.94503	3.56773	0.0229715	0.990466	1.14286e-14	20.48	0.32315
Firmicutes_186891	1.4259	1.34152	0.0439051	0.879453	1.48945e-06	25.98	0.321113
Firmicutes_4404181	1.70804	1.92048	0.0658116	0.900464	2.55201e-08	26	0.321113
Firmicutes_743082	1.85049	2.71002	0.0412876	0.959858	9.65209e-12	25.9	0.321113
Firmicutes_194424	2.1331	2.79788	0.0840826	0.957193	1.78169e-13	25.98	0.321113
Firmicutes_4363269	2.03301	2.50814	0.0874858	0.929359	7.90377e-11	25.98	0.320434
Firmicutes_1678333	1.80032	2.58662	0.0394625	0.948969	1.26831e-10	25.96	0.319077
Firmicutes_294440	1.9837	2.85368	0.0548118	0.951512	2.25044e-12	25.86	0.319077
Firmicutes_4316569	1.94427	3.50233	0.0245422	0.989462	0	23.68	0.319077
Firmicutes_4483337	1.68216	1.86097	0.0649145	0.898278	3.698e-07	26	0.317719
Actinobacteria_290572	1.93312	3.57821	0.021687	0.991061	2.71339e-15	20.56	0.317719
Firmicutes_4328241	1.72477	2.18244	0.0490634	0.926669	3.05175e-10	26	0.317719
Firmicutes_186921	1.43301	1.31442	0.0493116	0.890693	1.78697e-05	26	0.317719
Firmicutes_105409	1.91346	3.33865	0.025988	0.983048	1.73861e-15	23.9	0.317719
Bacteroidetes_4376649	1.60604	1.13391	0.147338	0.83284	5.40809e-06	26	0.31704
Bacteroidetes_3856406	1.49165	1.16089	0.090398	0.842763	1.69377e-05	26	0.31704
Proteobacteria_836308	1.8713	2.03653	0.0954895	0.898968	8.31926e-09	26	0.31704
Actinobacteria_591285	1.94347	2.43197	0.0752457	0.928106	3.74346e-10	25.98	0.31704
Actinobacteria_557799	1.94862	3.23137	0.0331621	0.978185	6.24834e-15	24.96	0.315682
Proteobacteria_819636	1.73995	2.02855	0.064053	0.904898	1.90001e-08	25.98	0.315682
Firmicutes_278758	1.86776	2.38734	0.0633399	0.937904	4.2621e-11	26	0.315003
Proteobacteria_818509	1.95385	3.6213	0.0225068	0.992983	5.54223e-15	20.74	0.315003
Firmicutes_110660	1.66039	2.44347	0.0251034	0.949297	6.0218e-10	25.78	0.313646
Firmicutes_4341119	1.80438	2.59728	0.0395613	0.950118	1.3536e-11	25.94	0.313646
Firmicutes_4473116	1.9345	2.35951	0.0795284	0.925261	1.61263e-10	26	0.312967
Firmicutes_4432433	2.01994	3.13653	0.0460737	0.97231	1.95399e-15	25.66	0.312967
Firmicutes_4468805	1.96311	3.29335	0.0327696	0.980898	4.17444e-16	24.96	0.311609
Firmicutes_762699	1.561	1.92177	0.0330478	0.916008	8.08203e-09	25.98	0.31093
Firmicutes_4335578	1.96792	3.00104	0.0449499	0.967577	1.19327e-14	25.76	0.310251
Firmicutes_178438	1.70953	2.04195	0.0558351	0.91201	2.78727e-09	25.98	0.309572
Actinobacteria_196140	1.83225	3.05167	0.0256596	0.974406	2.08988e-14	24.5	0.308893
Firmicutes_4459388	1.89344	2.92553	0.0378528	0.965613	2.39109e-13	25.56	0.308215
Firmicutes_2391105	1.84327	2.5577	0.0480076	0.942709	5.59328e-11	25.82	0.307536
Firmicutes_95910	1.77465	1.95201	0.0793421	0.906504	1.10256e-08	26	0.306857
Bacteroidetes_2469654	2.11359	3.30347	0.051371	0.976804	3.59712e-16	25.7	0.306857
Firmicutes_321059	1.49524	1.16773	0.0919465	0.872718	7.76518e-07	26	0.306178
Firmicutes_179390	1.26817	1.15739	0.0181402	0.895924	1.29975e-07	26	0.306178
Firmicutes_839610	1.50038	1.63502	0.0384846	0.887219	6.03358e-06	26	0.305499
Firmicutes_4381555	1.72353	1.89671	0.0716757	0.899976	2.13203e-08	26	0.305499
Firmicutes_268620	1.56325	1.68933	0.0496654	0.89443	1.07197e-07	26	0.30482
Firmicutes_571563	2.01092	2.6193	0.0744098	0.942206	3.48405e-11	25.98	0.30482
Firmicutes_130289	1.96799	2.33995	0.0883127	0.926572	2.85764e-10	26	0.30482
Firmicutes_1135364	1.95074	3.35272	0.0294437	0.983188	2.4869e-16	24.3	0.303462
Firmicutes_195843	1.41874	1.43903	0.0334015	0.90694	4.56374e-08	26	0.301426
Bacteroidetes_3695679	1.621	1.70786	0.0631656	0.888512	2.22922e-08	26	0.301426
Bacteroidetes_178064	1.79861	1.67306	0.120642	0.868257	3.84815e-07	26	0.301426
Firmicutes_2388088	1.66921	1.96008	0.0533084	0.910927	2.65435e-08	26	0.300747
Firmicutes_3270612	1.89943	3.45815	0.0214292	0.985964	4.20552e-14	21.8	0.300747
Firmicutes_584107	1.81519	2.7869	0.0328364	0.95958	3.25751e-13	25.68	0.300068
Firmicutes_189324	1.49214	1.74628	0.0296147	0.910494	2.31886e-08	25.94	0.299389
Bacteroidetes_4412630	2.18788	2.18558	0.157534	0.889274	1.21313e-08	26	0.299389
Bacteroidetes_239358	1.39648	0.919556	0.0927615	0.861804	1.12091e-06	26	0.299389
Proteobacteria_4436550	1.49608	1.13276	0.0988684	0.863228	2.83631e-06	26	0.29871
Firmicutes_185502	1.99824	2.0276	0.129078	0.887023	6.29874e-08	26	0.29871
Firmicutes_218710	1.91734	2.64377	0.0557471	0.946334	8.63984e-12	25.92	0.298031
Firmicutes_3680006	1.89404	2.17614	0.0865018	0.912995	1.34271e-09	26	0.297352
Actinobacteria_997439	1.92354	3.21111	0.0309486	0.978901	1.26343e-15	24.68	0.297352
Bacteroidetes_4435186	1.9006	3.30501	0.0255636	0.984216	2.28706e-16	23.98	0.296673
Firmicutes_594265	1.9234	3.25058	0.0296282	0.978158	3.07976e-15	24.62	0.296673
Proteobacteria_4408129	2.01283	2.38752	0.0937298	0.922775	8.68704e-10	26	0.296673
Firmicutes_289927	1.90204	3.40926	0.0228693	0.987206	3.13083e-15	22.8	0.296673
Firmicutes_359445	1.86257	3.03421	0.0297085	0.972653	3.93441e-14	24.82	0.295316
Bacteroidetes_1935637	1.49593	1.51318	0.0474488	0.886242	1.10306e-06	26	0.295316
Firmicutes_157033	1.93468	3.36809	0.0272565	0.985421	9.99201e-17	24.24	0.293958
Firmicutes_322571	1.52917	2.00855	0.0231987	0.92696	1.19323e-09	25.96	0.293958
Firmicutes_4408503	1.99455	3.48896	0.0300128	0.984454	2.59792e-15	23.24	0.2926
Firmicutes_25461	1.71077	1.93214	0.065048	0.891264	7.15e-08	26	0.2926
Bacteroidetes_4426266	1.50025	0.986122	711.599	0.830441	8.20131e-05	26	0.2926
Firmicutes_179018	1.81908	2.97068	0.0266688	0.970355	1.5703e-13	25.3	0.291921
Proteobacteria_4402735	2.17794	2.55705	0.113386	0.937338	7.46029e-11	26	0.291921
Firmicutes_275061	1.67907	2.64075	0.0206007	0.960817	1.20006e-12	25.46	0.291921
Firmicutes_4378519	2.05623	2.18736	0.124276	0.90157	4.93624e-09	26	0.291242
Firmicutes_518040	1.70733	1.97992	0.0600123	0.914298	3.54786e-09	25.98	0.290563
Cyanobacteria_245980	1.965	3.10672	0.0399563	0.973328	4.34763e-15	25.42	0.289885
Firmicutes_187468	1.84241	1.89644	0.103375	0.88632	7.1932e-07	26	0.289885
Firmicutes_4344651	1.87623	3.15971	0.0272411	0.977951	1.14797e-15	24.5	0.289206
Firmicutes_858999	1.65931	2.20024	0.0356514	0.925023	1.26246e-08	25.94	0.289206
Bacteroidetes_198786	1.87189	2.83556	0.0386758	0.96171	1.47322e-13	25.82	0.288527
Firmicutes_180658	1.43566	1.45447	0.0366804	0.899432	3.28594e-07	26	0.287848
Firmicutes_4347652	1.61956	1.36671	0.107176	0.864161	9.50439e-07	26	0.287169
Firmicutes_298036	1.3241	1.40338	0.0154992	0.921026	3.56074e-07	25.96	0.28649
Proteobacteria_4470874	1.93397	3.57365	0.0218604	0.990771	9.19265e-16	21.38	0.285811
Firmicutes_195221	1.53159	1.64656	0.0450299	0.897591	2.51698e-08	25.98	0.285132
Bacteroidetes_3890155	2.16477	2.16549	0.153832	0.893498	2.30483e-08	26	0.285132
Firmicutes_2820255	1.83146	3.14994	0.0227233	0.976001	1.07314e-14	24.6	0.285132
Firmicutes_190220	1.75801	2.31936	0.0465325	0.928249	1.65458e-09	25.94	0.284453
Firmicutes_179148	1.59533	1.95506	0.0376947	0.923967	3.71126e-08	25.96	0.284453
Firmicutes_292909	1.83714	2.66353	0.0414058	0.950443	1.16558e-11	25.74	0.284453
Firmicutes_3857426	1.62311	1.81373	0.0541054	0.895135	2.16245e-06	25.98	0.283775
Firmicutes_1086805	1.99451	3.30841	0.0359106	0.97958	5.28466e-16	24.86	0.283775
Firmicutes_1146158	1.67667	2.32642	0.032302	0.943933	3.25235e-10	25.82	0.283775
Firmicutes_184339	1.52975	1.67088	0.0425288	0.900015	6.08614e-07	26	0.283775
Actinobacteria_526682	2.05616	2.5409	0.0887863	0.938099	2.01051e-11	25.96	0.283096
Firmicutes_341221	1.44117	1.58949	0.0289769	0.906878	4.09854e-08	25.98	0.283096
Firmicutes_292216	2.05475	2.63463	0.081845	0.937198	4.10624e-11	26	0.283096
Firmicutes_4326091	1.61968	2.14092	0.0320368	0.942563	2.38868e-09	25.92	0.282417
Firmicutes_185021	1.55532	1.65636	0.0504176	0.888438	1.48207e-06	26	0.281059
Firmicutes_173920	1.49529	1.55367	0.0435437	0.899618	8.14207e-07	26	0.279701
Firmicutes_194471	1.82436	2.08874	0.0783241	0.904697	1.90129e-08	26	0.279022
Firmicutes_4318284	1.87979	2.98624	0.0336073	0.968674	1.46632e-13	25.3	0.278344
Proteobacteria_3407050	2.00665	3.55025	0.0294487	0.988027	1.00364e-15	22.84	0.276986
Firmicutes_4366523	1.44755	1.48567	0.0368973	0.898636	1.55546e-07	26	0.276986
Firmicutes_298804	1.65891	2.29856	0.0306983	0.941092	2.33623e-09	25.78	0.273591
Firmicutes_4467992	1.70587	1.89512	0.0672962	0.917472	4.32814e-09	25.96	0.272912
Firmicutes_589076	1.96528	3.65817	0.0226176	0.993283	5.75096e-16	20.74	0.272912
Firmicutes_4350035	1.50708	1.20998	0.0881985	0.854209	1.3071e-06	26	0.272234
Firmicutes_4455005	1.75152	2.86594	0.0221462	0.965103	9.41581e-12	24.84	0.272234
Firmicutes_4472195	1.87751	2.7881	0.0415931	0.957716	3.88578e-12	25.58	0.271555
Firmicutes_4315788	1.91909	3.46556	0.0230738	0.985915	1.75793e-14	21.96	0.270197
Firmicutes_1066830	1.8784	3.01737	0.0321986	0.970128	2.94542e-14	24.68	0.268839
Firmicutes_4476936	2.00513	3.30966	0.0371615	0.978537	1.0969e-15	24.72	0.268839
Firmicutes_176947	1.94102	3.17164	0.0343438	0.975674	6.40377e-15	24.96	0.268839
Firmicutes_34139	1.68331	1.93743	0.0580332	0.900567	3.40626e-08	26	0.268839
Firmicutes_182264	1.55069	1.55384	0.058572	0.888866	2.92952e-08	26	0.268839
Bacteroidetes_3028318	1.99217	3.25936	0.0373838	0.976382	1.13021e-15	25	0.267481
Firmicutes_178930	1.96113	3.63471	0.0228184	0.991904	5.15143e-16	20.62	0.266802
Actinobacteria_4441343	1.88915	2.9722	0.035319	0.970042	1.61626e-14	25.6	0.266802
Firmicutes_335577	1.51426	1.52553	0.0510364	0.877471	4.93947e-07	25.98	0.266124
Firmicutes_183925	1.88538	3.09381	0.0303467	0.974605	3.35287e-14	24.98	0.265445
Firmicutes_189530	1.99362	2.79994	0.0594788	0.952567	7.34302e-13	25.94	0.264087
Firmicutes_190473	1.90207	2.8484	0.0423737	0.961555	1.70508e-13	25.68	0.264087
Proteobacteria_1109850	1.96694	3.52113	0.0262531	0.988914	6.66134e-18	23.36	0.263408
Firmicutes_322580	1.60126	1.8706	0.0443284	0.900552	4.32798e-07	26	0.263408
Firmicutes_4439489	1.79722	3.00874	0.0230131	0.972621	1.02724e-13	24.64	0.262729
Actinobacteria_292521	1.87873	2.54566	0.055005	0.948136	3.0444e-12	25.96	0.262729
Firmicutes_297385	1.91756	3.31825	0.0269169	0.983839	4.19664e-16	24.16	0.262729
Firmicutes_367814	1.52463	1.81029	0.0321499	0.912499	5.62578e-08	26	0.260692
Firmicutes_362853	2.01704	3.0183	0.051289	0.966056	1.9722e-14	25.72	0.259335
Proteobacteria_4454979	2.06453	2.90693	0.064814	0.957889	8.26121e-13	25.86	0.258656
Firmicutes_178970	1.66001	2.30349	0.0305447	0.939152	3.66627e-10	25.74	0.258656
Firmicutes_179297	1.92117	3.31638	0.0273826	0.983387	3.9968e-16	23.96	0.258656
Firmicutes_4391672	1.95541	3.3071	0.0313892	0.98175	4.13003e-16	24.62	0.257298
Firmicutes_687175	1.61281	2.02336	0.0368286	0.920972	2.36893e-09	25.9	0.257298
Firmicutes_4380137	1.95518	3.25129	0.0332113	0.977993	1.84741e-15	24.56	0.257298
Firmicutes_179649	1.40349	1.3435	0.0362949	0.911563	1.65173e-07	26	0.257298
Firmicutes_335910	1.90127	2.66998	0.051511	0.955023	3.54006e-13	25.82	0.256619
Firmicutes_245625	1.98208	2.60789	0.0695695	0.942891	9.92445e-12	25.92	0.25594
Firmicutes_177039	1.69568	2.63448	0.0227892	0.95856	2.34249e-11	25.54	0.255261
Firmicutes_2190939	1.87237	3.04525	0.030476	0.972142	1.99107e-14	24.86	0.255261
Firmicutes_290548	1.95397	2.76278	0.0548929	0.952236	1.12533e-12	25.94	0.255261
Firmicutes_266062	1.76898	2.67652	0.0307849	0.956559	1.75258e-12	25.42	0.254582
Bacteroidetes_4372130	1.4856	1.39343	0.0554651	0.891182	8.59888e-08	26	0.253904
Firmicutes_297917	1.98935	3.22009	0.0385175	0.974407	4.34319e-15	24.94	0.253904
Firmicutes_337468	1.5662	2.2965	0.0178387	0.952449	4.60682e-09	25.66	0.253225
Firmicutes_198362	1.47478	1.51984	0.0406354	0.906187	4.71404e-09	26	0.252546
Firmicutes_2160415	1.64946	2.21602	0.0330908	0.938661	8.45336e-09	25.92	0.251867
Firmicutes_216010	1.68474	2.33939	0.0327544	0.934839	5.80793e-10	25.88	0.251867
Firmicutes_289310	1.92722	3.39674	0.025671	0.984308	2.81997e-16	23.34	0.251867
Proteobacteria_4404220	1.96082	2.90867	0.0482335	0.95997	3.67855e-12	25.68	0.251188
Firmicutes_4310675	1.95195	3.40406	0.0280287	0.98456	4.21885e-17	24.26	0.251188
Firmicutes_4303852	1.47228	1.65847	0.0303884	0.907841	5.82295e-08	25.98	0.250509
Firmicutes_89615	2.00505	3.20966	0.0409924	0.974406	1.62537e-15	25.44	0.250509
Firmicutes_194792	1.45643	1.65404	0.027472	0.929731	2.36305e-09	25.98	0.250509
Bacteroidetes_518538	1.98323	2.92182	0.0509444	0.96016	6.40652e-13	25.84	0.250509
Firmicutes_4315782	1.94186	3.48707	0.0246802	0.988057	3.88578e-16	22.76	0.24983
Firmicutes_4408418	1.86949	3.37347	0.0206812	0.987554	3.59268e-15	22.28	0.24983
Firmicutes_185563	1.36035	1.2631	0.18962	0.902024	1.64291e-07	26	0.24983
Proteobacteria_4454356	2.11242	2.27136	0.128041	0.896914	6.05587e-09	26	0.24983
Firmicutes_4380813	1.6979	1.74683	0.0803694	0.881601	1.73048e-05	26	0.249151
Firmicutes_4238179	1.76177	2.59524	0.0330769	0.95534	4.06827e-12	25.66	0.249151
Proteobacteria_1108502	1.97721	2.91315	0.0505408	0.962314	8.49898e-14	25.86	0.248473
Firmicutes_559659	1.90004	3.49992	0.0205241	0.988805	5.18252e-14	20.42	0.247794
Proteobacteria_3076932	1.45675	1.1731	0.0743588	0.879697	2.45225e-07	26	0.247115
Bacteroidetes_182117	1.36176	1.27203	0.0310969	0.909773	9.39412e-07	26	0.247115
Proteobacteria_199089	2.06147	3.21008	0.048499	0.971777	1.95621e-15	25.72	0.247115
Proteobacteria_558281	1.46543	1.38892	0.0497718	0.901372	5.98208e-07	26	0.246436
Firmicutes_771181	1.74901	2.78724	0.024304	0.964956	6.16882e-13	25.18	0.246436
Firmicutes_28702	1.80212	2.52958	0.0424366	0.943859	5.95653e-11	25.88	0.246436
Proteobacteria_246330	1.32261	1.05136	2.82777e+11	0.892808	3.97346e-07	26	0.245757
Firmicutes_351501	1.84959	2.90457	0.0327241	0.966784	4.00591e-14	25.18	0.245078
Firmicutes_4445078	1.92731	3.13173	0.0341153	0.973836	9.9476e-15	25	0.245078
Proteobacteria_4419621	1.96026	2.89103	0.0490003	0.957881	4.28881e-13	25.82	0.245078
Firmicutes_234724	1.69414	2.66781	0.0215094	0.960142	4.28529e-11	25.18	0.244399
Firmicutes_177349	1.63837	1.8709	0.0526832	0.910591	7.74896e-09	25.96	0.24372
Firmicutes_190658	1.72638	2.19896	0.0481044	0.92928	1.44182e-10	25.98	0.243041
Firmicutes_3514043	1.78811	3.0295	0.0214511	0.969498	4.71024e-12	23.92	0.243041
Firmicutes_328466	1.48462	1.64199	0.0337881	0.908438	2.66434e-08	25.94	0.242363
Proteobacteria_4461030	1.85408	2.43647	0.0570456	0.938576	3.57351e-11	25.96	0.242363
Firmicutes_297182	1.98146	2.50645	0.0770467	0.929097	1.7898e-10	25.94	0.241684
Firmicutes_302683	1.97132	2.70855	0.0611917	0.951596	8.15366e-13	25.92	0.241684
Firmicutes_520720	1.89176	3.37861	0.0226568	0.984968	6.46816e-15	23.12	0.241684
Firmicutes_1146771	1.88281	2.79685	0.0418984	0.957455	2.38627e-13	25.44	0.240326
Firmicutes_2177996	1.83823	3.05201	0.0262507	0.973905	6.84586e-14	24.38	0.240326
Bacteroidetes_2082	1.99092	3.25879	0.0372412	0.975845	2.36255e-15	25.3	0.239647
Firmicutes_3750380	1.90743	2.4796	0.0643547	0.943071	7.2956e-12	25.96	0.238968
Firmicutes_158950	1.72902	2.64752	0.026578	0.960715	6.97502e-13	25.42	0.238968
Firmicutes_2549971	1.73879	2.07159	0.0601228	0.918602	3.94328e-09	26	0.238968
Proteobacteria_2304693	1.37225	1.2231	0.0381282	0.905998	3.01133e-08	25.96	0.23761
Firmicutes_326390	1.93973	2.46677	0.071624	0.933911	7.53312e-11	26	0.23761
Firmicutes_4133460	1.65289	2.29078	0.0300936	0.939833	2.85008e-09	25.74	0.236931
Actinobacteria_12562	1.95322	3.40747	0.0280342	0.983403	2.57305e-14	22.64	0.236931
Firmicutes_4383827	1.64643	1.68622	0.0723741	0.88632	4.34515e-07	26	0.236931
Firmicutes_963606	1.85786	3.14449	0.0256314	0.97935	1.85718e-14	24.06	0.234895
Firmicutes_351126	1.74664	2.36475	0.0418448	0.939398	3.9262e-11	25.76	0.234216
Firmicutes_157842	1.93223	3.60552	0.0209372	0.990756	3.69837e-14	20.28	0.233537
Firmicutes_519680	1.57417	1.72916	0.0489608	0.908323	7.93307e-07	25.98	0.233537
Firmicutes_197460	1.61259	1.61257	0.0705781	0.904618	3.06366e-08	26	0.233537
Firmicutes_334797	1.9125	2.58447	0.0583013	0.943377	7.5738e-12	25.88	0.232858
Firmicutes_291270	1.90496	3.50814	0.0207584	0.988594	2.03108e-12	20.16	0.232858
Firmicutes_145401	1.68691	1.75724	0.0764239	0.899222	4.61377e-08	26	0.232179
Firmicutes_185597	1.68007	2.57886	0.0226599	0.958157	2.20673e-11	25.24	0.232179
Firmicutes_196905	1.8143	3.02812	0.024312	0.972383	5.67213e-14	24.62	0.2315
Proteobacteria_4389529	1.98456	3.58235	0.026325	0.988452	3.9746e-16	22.12	0.2315
Firmicutes_4303213	1.94277	3.57947	0.0224894	0.990148	2.30393e-14	20.92	0.2315
Firmicutes_178117	1.57158	1.86048	0.038472	0.927523	8.55372e-09	25.96	0.230821
Firmicutes_193744	1.69705	1.95087	0.0599005	0.912156	1.13311e-07	25.94	0.230821
Firmicutes_4456607	1.95415	3.51134	0.025224	0.986067	9.38138e-15	20.66	0.230821
Firmicutes_145304	1.78004	2.98725	0.021784	0.972744	6.88383e-14	24.2	0.230143
Firmicutes_92535	1.95098	2.83443	0.0505334	0.95693	2.99891e-13	25.82	0.230143
Proteobacteria_87839	1.98447	3.63644	0.0249074	0.991018	9.52571e-16	21.2	0.230143
Firmicutes_4393499	1.95095	3.34867	0.0295419	0.980846	1.54765e-15	23.76	0.230143
Firmicutes_4030287	1.89473	2.61442	0.053281	0.944669	1.57087e-11	25.86	0.230143
Firmicutes_321693	1.62563	2.18029	0.0306401	0.935847	1.09681e-10	25.76	0.228106
Bacteroidetes_197537	1.43322	1.40769	0.0389599	0.885186	2.95629e-06	25.98	0.227427
Firmicutes_365574	1.91831	2.51341	0.0641345	0.939377	1.80201e-11	25.92	0.227427
Firmicutes_158302	1.94315	3.5103	0.0242309	0.988008	1.18416e-14	21.72	0.227427
Firmicutes_133358	1.94029	3.50726	0.0240141	0.988569	7.66054e-16	22.4	0.227427
Tenericutes_574720	1.93602	3.50201	0.0237543	0.98711	3.24192e-13	21.38	0.226748
Firmicutes_843454	1.78721	3.18031	0.017663	0.979686	1.57676e-13	22.76	0.226748
Proteobacteria_318399	1.74497	2.44113	0.0376111	0.946726	6.1556e-11	25.88	0.226069
Firmicutes_199318	1.37841	1.37849	0.0270522	0.893535	3.38188e-07	26	0.226069
Firmicutes_336063	1.45093	1.66582	0.0255484	0.926746	5.86539e-09	25.92	0.226069
Firmicutes_3412718	1.95464	3.61188	0.0227722	0.990337	2.21956e-14	20.48	0.22539
Euryarchaeota_150477	1.827	3.30738	0.0183744	0.98362	7.10794e-13	21.68	0.22539
Firmicutes_191849	1.9286	3.38242	0.0262356	0.981286	3.54274e-13	22.82	0.22539
Firmicutes_3409355	1.69219	2.54669	0.0252873	0.958674	1.23351e-12	25.48	0.22539
Bacteroidetes_4474533	1.97122	3.47694	0.0279257	0.983367	2.52378e-13	20.8	0.224711
Firmicutes_4393390	1.50664	1.74756	0.0319031	0.93018	1.83506e-09	25.94	0.224033
Firmicutes_113827	1.74976	2.3831	0.0414804	0.939777	3.27378e-11	25.82	0.223354
Firmicutes_360240	1.90051	2.77726	0.0456062	0.95748	6.307e-13	25.66	0.223354
Firmicutes_197107	1.64513	2.28356	0.0291527	0.945246	2.19207e-08	25.84	0.222675
Firmicutes_4318671	1.96148	3.09854	0.0396999	0.971032	4.41203e-15	25.36	0.222675
Firmicutes_185914	1.91667	3.44601	0.0233397	0.985578	7.68208e-14	20.74	0.222675
Firmicutes_185148	1.43988	1.41702	0.0397293	0.903591	1.28985e-07	26	0.222675
Firmicutes_204352	1.78074	3.02552	0.0208086	0.976403	9.30056e-14	24.16	0.221996
Firmicutes_194082	1.54549	1.80728	0.0365135	0.916259	2.608e-07	25.9	0.221996
Firmicutes_185042	1.95839	3.28378	0.0325196	0.978847	5.58886e-15	23.9	0.220638
Firmicutes_47477	1.61567	1.97068	0.0405006	0.932161	1.33201e-07	25.96	0.220638
Firmicutes_178608	1.64947	1.99587	0.0457611	0.920362	4.76408e-09	25.98	0.220638
Firmicutes_327209	1.77951	2.81247	0.0271222	0.964165	6.13676e-13	24.72	0.218601
Firmicutes_179576	1.77851	2.48968	0.04063	0.945846	1.26947e-11	25.74	0.217923
Firmicutes_194130	1.4576	1.58142	0.0322587	0.915118	5.37659e-09	25.98	0.217923
Firmicutes_178642	1.45178	1.57898	72.8879	0.918291	1.06604e-05	25.96	0.217923
Firmicutes_187811	1.61354	1.64812	0.0669494	0.896185	3.48395e-07	26	0.217923
Firmicutes_4375646	1.61726	1.55356	0.0783544	0.875624	1.36589e-06	26	0.217244
Firmicutes_335097	1.42399	1.74219	0.0176456	0.924832	5.13129e-09	25.92	0.216565
Firmicutes_199218	1.70653	2.17678	0.045539	0.930816	8.6424e-11	25.92	0.215886
Bacteroidetes_183012	1.70705	2.22382	0.0427085	0.930416	2.18585e-10	25.86	0.215886
Firmicutes_288682	1.53983	1.82028	0.0342938	0.914919	2.6417e-08	25.94	0.215886
Firmicutes_297872	1.87422	2.88426	0.0366822	0.965941	4.34246e-13	24.58	0.215207
Firmicutes_318957	1.69515	2.36858	0.0330176	0.937114	2.76297e-09	25.72	0.215207
Firmicutes_209475	1.4685	1.7071	0.0263365	0.922819	2.42945e-08	25.96	0.215207
Firmicutes_725212	1.6464	2.63244	0.0171309	0.961581	7.54889e-11	24.72	0.214528
Firmicutes_196392	1.78763	3.04237	0.021089	0.977139	1.69273e-13	23.68	0.213849
Firmicutes_211750	1.91602	3.54283	0.020937	0.98814	1.52328e-12	20.24	0.213849
Firmicutes_182577	1.56795	1.44219	0.0772455	0.882814	7.05839e-08	26	0.21317
Firmicutes_370183	1.80592	2.46476	0.0466729	0.941196	1.28356e-11	25.86	0.21317
Firmicutes_1106006	1.88122	2.97	0.0343729	0.966745	4.27947e-14	25.4	0.212492
Firmicutes_320430	1.83411	2.95165	0.029049	0.970256	5.4281e-14	25.04	0.212492
Firmicutes_2123719	1.4335	1.58977	0.0259878	0.919985	7.3546e-09	25.94	0.212492
Bacteroidetes_4354229	1.29371	0.830982	0.0816972	0.874001	3.65664e-06	25.96	0.211813
Firmicutes_368412	1.54647	1.85202	0.0336301	0.92045	1.10404e-08	25.9	0.211813
Firmicutes_2915091	1.53751	1.46133	0.0641076	0.889588	1.43859e-06	26	0.210455
Firmicutes_4078476	1.79895	2.70829	0.0336826	0.957955	5.62304e-13	25.46	0.210455
Bacteroidetes_4389435	1.75575	2.20741	0.0534226	0.925851	6.88053e-10	25.9	0.210455
Firmicutes_298374	1.86676	2.86471	0.0366374	0.965439	2.39895e-13	25.22	0.209776
Firmicutes_317502	1.4853	1.64618	0.0336227	0.90849	4.76441e-08	25.96	0.209776
Bacteroidetes_3970651	1.97996	3.57343	0.0261052	0.986928	3.72813e-15	21.3	0.209097
Firmicutes_919806	1.8687	3.06559	0.0293282	0.972512	8.82849e-14	24.7	0.208418
Firmicutes_338355	1.61126	2.18657	0.0279937	0.943478	1.15111e-08	25.66	0.207739
Firmicutes_196918	1.61529	2.07225	0.0343612	0.939218	2.0415e-10	25.78	0.207739
Actinobacteria_175508	1.69015	2.50369	0.0266331	0.953744	6.54339e-11	25.48	0.20706
Firmicutes_525474	1.94359	3.02839	0.0402847	0.965308	2.5602e-13	25.48	0.20706
Firmicutes_331014	1.86354	3.27657	0.0225113	0.981967	2.4305e-14	22.64	0.20706
Firmicutes_708285	1.90537	3.32598	0.0254053	0.981327	4.1982e-14	22.72	0.20706
Firmicutes_293990	1.63334	2.00496	0.0418392	0.922196	2.88366e-09	25.98	0.20706
Proteobacteria_4482362	1.59348	2.16833	0.025951	0.948452	1.47291e-09	25.86	0.20706
Firmicutes_4442383	1.8647	2.97329	0.0320709	0.968888	8.614e-14	24.86	0.206382
Firmicutes_4435236	1.93091	3.55965	0.0218988	0.990057	1.6054e-13	20.14	0.206382
Firmicutes_697208	1.69107	2.24323	0.038898	0.941938	2.5384e-10	25.8	0.205703
Firmicutes_157054	1.95573	3.16123	0.0365323	0.972023	1.5179e-14	24.5	0.205024
Firmicutes_196191	1.81835	2.59573	0.0418079	0.952301	3.21212e-12	25.44	0.205024
Firmicutes_1145098	1.80944	2.58079	0.0410132	0.946495	9.83719e-11	25.74	0.204345
Firmicutes_355939	1.45628	1.5128	0.0359633	0.907252	4.30901e-08	25.96	0.203666
Firmicutes_839545	1.91013	2.74239	0.0488991	0.953427	1.7493e-12	25.68	0.203666
Proteobacteria_4356099	1.3726	1.01741	0.0627592	0.87668	2.2464e-06	26	0.202987
Firmicutes_301325	1.66262	2.29655	0.0311404	0.947585	1.9175e-11	25.82	0.202987
Firmicutes_149699	1.67297	2.19403	0.0381441	0.933329	8.85954e-10	25.92	0.202987
Firmicutes_36125	1.92231	3.18443	0.0316568	0.974447	4.97824e-15	24.62	0.202308
Firmicutes_1625448	1.87632	3.32228	0.0225737	0.981607	2.70559e-13	22.54	0.202308
Firmicutes_297856	1.75098	2.50149	0.0356805	0.946949	3.34088e-11	25.68	0.202308
Firmicutes_194899	1.63655	1.99183	0.0432466	0.925099	9.17453e-10	25.92	0.201629
Firmicutes_196435	1.74208	2.50099	0.0342608	0.948751	9.91744e-12	25.76	0.201629
Firmicutes_4296771	1.72483	2.87005	0.0191344	0.965628	1.14286e-10	24.22	0.201629
Proteobacteria_2749126	1.6287	1.69578	0.0662335	0.904828	1.24734e-07	26	0.201629
Firmicutes_292255	1.90965	3.18072	0.0302939	0.976138	3.52267e-13	24.58	0.201629
Firmicutes_210095	1.60897	1.93205	0.0414944	0.911695	3.00458e-07	25.9	0.20095
Firmicutes_348287	1.68126	2.73772	0.018107	0.963088	2.25517e-11	24.32	0.200272
Firmicutes_301062	1.94571	3.23593	0.0326012	0.97672	7.00773e-15	24.28	0.200272
Firmicutes_686900	1.82856	2.46249	0.0506559	0.941693	4.19744e-09	25.74	0.199593
Actinobacteria_4328026	1.88446	3.34673	0.0227595	0.982585	3.43614e-14	22.36	0.199593
Firmicutes_4408423	1.8286	2.09268	0.0790088	0.904062	6.36138e-09	25.98	0.199593
Firmicutes_1094991	1.5713	2.05896	0.0273107	0.932479	4.86116e-09	25.8	0.199593
Firmicutes_190534	1.98387	3.22896	0.037492	0.973428	5.29576e-15	25.06	0.199593
Firmicutes_323189	1.60244	2.10934	0.0302012	0.937894	1.20425e-09	25.8	0.198914
Firmicutes_4483015	1.9989	2.98709	0.0500655	0.96052	1.52411e-13	25.72	0.198235
Firmicutes_92329	1.89252	3.14781	0.0293951	0.974373	1.23435e-14	24.32	0.197556
Firmicutes_291149	1.78252	2.77669	0.0287623	0.959032	5.79556e-13	24.74	0.197556
Firmicutes_179861	1.64754	2.41333	0.0241049	0.955646	2.54392e-12	25.56	0.196877
Firmicutes_298624	1.73231	2.82113	0.0213348	0.97024	8.23405e-12	24.36	0.196877
Firmicutes_232222	1.88021	3.34359	0.0224463	0.98454	9.8308e-14	22.36	0.196877
Firmicutes_195998	1.67225	2.42917	0.0269684	0.953464	7.06724e-12	25.5	0.196198
Firmicutes_303864	1.84697	3.0959	0.0258558	0.975934	6.06026e-14	23.96	0.196198
Firmicutes_4446238	1.89471	3.16717	0.0289985	0.975116	5.1632e-14	23.8	0.196198
Firmicutes_3468951	1.47065	1.35787	0.0548933	0.897672	4.57444e-07	25.98	0.195519
Firmicutes_4296242	2.01488	3.30606	0.0384735	0.974879	1.05806e-13	24.82	0.19484
Firmicutes_306711	1.61782	2.03626	0.0367939	0.931913	9.83461e-09	25.82	0.19484
Actinobacteria_1061641	1.89113	3.06963	0.0318904	0.973156	8.16902e-15	24.82	0.194162
Firmicutes_4420959	1.45433	1.59942	0.0295482	0.922985	3.30358e-09	25.94	0.194162
Firmicutes_288138	1.52733	1.95105	0.0247933	0.930604	2.69853e-09	25.84	0.193483
Verrucomicrobia_358757	1.6271	2.25608	0.0274499	0.947862	2.27607e-11	25.72	0.193483
Firmicutes_179549	1.39506	1.3693	0.0314459	0.921369	7.42158e-09	25.96	0.192804
Bacteroidetes_840279	1.86704	2.83202	0.038014	0.961913	5.19544e-13	25.3	0.192804
Firmicutes_171399	1.3939	1.20346	0.0462529	0.899308	8.20103e-08	25.98	0.192804
Firmicutes_307526	1.96649	3.55174	0.0253651	0.986159	1.18261e-14	21.22	0.192125
Firmicutes_187835	1.44425	1.5532	0.0303744	0.931186	2.86626e-09	25.96	0.190767
Firmicutes_346253	1.65177	2.11328	0.0388507	0.93349	3.40156e-09	25.86	0.190088
Firmicutes_2256432	1.85556	2.64798	0.045069	0.94551	1.94445e-11	25.8	0.190088
Firmicutes_188872	1.49551	1.71991	0.0311013	0.924534	5.91353e-08	25.82	0.189409
Firmicutes_4355601	1.46833	1.58153	0.0339635	0.916595	3.11056e-08	25.92	0.18873
Bacteroidetes_3465320	1.40166	1.44831	0.0273236	0.919696	5.1027e-09	25.96	0.18873
Firmicutes_594206	1.98301	3.0674	0.043971	0.962758	6.14175e-14	25.26	0.18873
Proteobacteria_546384	1.73237	2.2263	0.047396	0.937704	1.59048e-10	25.84	0.18873
Firmicutes_294363	1.45899	1.57171	0.0324461	0.912608	1.24987e-07	25.9	0.188052
Firmicutes_193887	1.49979	1.68891	0.034028	0.915794	1.10242e-07	25.92	0.188052
Firmicutes_25534	1.6287	2.39151	0.022386	0.958953	3.53979e-12	25.26	0.188052
Firmicutes_4480176	1.83224	2.79138	0.0348829	0.961081	4.24187e-13	25.14	0.188052
Firmicutes_4454140	1.92302	3.29567	0.0281127	0.980072	2.78666e-15	24.4	0.188052
Firmicutes_849346	1.72286	2.63902	0.0259718	0.954963	1.35404e-11	25.18	0.187373
Firmicutes_290983	1.91609	2.90301	0.0419917	0.96246	1.11939e-13	25.32	0.187373
Firmicutes_4483392	1.58347	1.71095	0.052494	0.90532	1.87678e-08	25.94	0.186694
Firmicutes_145856	1.74098	2.75096	0.0244276	0.960821	3.89771e-12	24.94	0.186694
Firmicutes_579278	1.68856	2.50716	0.0262168	0.955619	3.92563e-12	25.4	0.186015
Firmicutes_302407	1.48447	1.78728	0.0251097	0.932949	5.2404e-10	25.84	0.186015
Firmicutes_432444	1.87845	3.4021	0.0208393	0.983092	3.7389e-13	20.48	0.186015
Firmicutes_179562	1.5246	1.83795	0.0300977	0.92034	1.38523e-08	25.8	0.186015
Firmicutes_1110135	1.42015	1.55536	0.0249029	0.92941	5.44544e-10	25.9	0.186015
Firmicutes_359509	1.82172	2.8255	0.0320038	0.959545	5.16791e-12	25.04	0.185336
Firmicutes_317923	1.86842	2.9861	0.0320877	0.966817	1.14309e-13	24.2	0.185336
Proteobacteria_4353790	1.43625	1.24242	0.0559662	0.897028	5.2891e-08	26	0.185336
Firmicutes_662852	1.65451	2.39587	0.0256976	0.950256	2.56655e-11	25.5	0.185336
Firmicutes_196590	1.61304	1.99065	0.0383963	0.922093	1.16498e-09	25.86	0.185336
Firmicutes_187689	1.4741	1.65102	0.0306152	0.918851	1.49842e-08	25.88	0.185336
Firmicutes_574263	1.38513	1.27985	0.0357486	0.905033	6.10209e-08	25.98	0.184657
Bacteroidetes_4342704	1.3669	0.978946	0.0662189	0.870147	1.90396e-06	25.98	0.184657
Firmicutes_355197	1.31089	1.1704	0.0239819	0.920436	1.87857e-08	25.98	0.183978
Firmicutes_718358	1.64695	2.20076	0.0332764	0.941845	7.0198e-11	25.7	0.183978
Firmicutes_509709	1.67035	2.02003	0.0486144	0.923257	2.78153e-10	25.88	0.183978
Firmicutes_470117	1.5348	1.96742	0.0253678	0.942383	2.10862e-10	25.62	0.183299
Firmicutes_621651	1.93027	3.28132	0.0293791	0.97817	3.31291e-15	23.9	0.183299
Firmicutes_4354311	1.90329	3.05152	0.034067	0.96895	2.52376e-14	25.12	0.183299
Proteobacteria_296945	1.67789	2.58763	0.0220028	0.960973	1.43904e-11	24.92	0.183299
Bacteroidetes_953855	1.50861	1.53417	0.0481918	0.9057	9.96692e-07	25.96	0.183299
Firmicutes_196061	1.63808	2.35701	0.0249248	0.953036	1.05796e-11	25.4	0.182621
Firmicutes_1073476	1.84777	3.26749	0.0212231	0.9837	5.6406e-14	22.52	0.181263
Firmicutes_178631	1.50151	1.79797	0.0277344	0.929389	1.53322e-08	25.82	0.179905
Firmicutes_265654	1.79724	2.93405	0.0252593	0.968566	5.77003e-13	24.44	0.179905
Firmicutes_197186	1.71441	2.67988	0.0235088	0.964781	1.82151e-11	24.92	0.179905
Firmicutes_291147	1.63781	2.04185	0.0402283	0.923659	1.7345e-09	25.88	0.179905
Firmicutes_305247	1.85986	2.72157	0.0420182	0.95478	1.37948e-12	25.44	0.179905
Firmicutes_4439530	1.69308	2.32616	0.0346812	0.94642	1.78546e-10	25.78	0.179905
Firmicutes_4406818	1.63774	2.21141	0.031065	0.937447	2.24014e-10	25.7	0.179905
Bacteroidetes_4226619	1.49506	1.64354	0.0357691	0.928069	3.0538e-10	25.92	0.179226
Firmicutes_198980	1.5225	1.87535	0.0276018	0.929005	8.67405e-10	25.82	0.179226
Firmicutes_837396	1.9317	3.46314	0.0243353	0.986791	5.38902e-15	21.92	0.179226
Firmicutes_179499	1.46761	1.73111	0.0247743	0.934561	1.26147e-10	25.88	0.178547
Firmicutes_183245	1.59176	2.11768	0.02793	0.944028	1.90325e-09	25.62	0.177868
Proteobacteria_537085	1.88075	2.96129	0.0345678	0.968881	1.4817e-14	25.24	0.177868
Firmicutes_260058	1.36337	1.46386	0.0182868	0.924478	2.65913e-09	25.84	0.177189
Firmicutes_4390972	1.86597	3.36777	0.0205009	0.983402	1.01613e-12	20.64	0.177189
Proteobacteria_4445991	1.87378	3.22367	0.0249757	0.979492	7.87592e-15	23.3	0.176511
Firmicutes_311426	1.89596	3.48103	0.0205894	0.988338	4.98792e-13	20.04	0.176511
Firmicutes_4381545	1.7616	2.17933	0.0563982	0.918687	2.12389e-09	25.96	0.175832
Firmicutes_291387	1.43471	1.48174	0.0327569	0.926757	1.71693e-08	25.94	0.175153
Proteobacteria_4440096	1.94133	3.47706	0.0249096	0.987245	3.62821e-15	21.6	0.174474
[truncated: 840 more rows]

## Sheet: Table S6
Table S6. The minimal reads for the selected species (shared by no less than 20 subjects from 32-cohort study) required to achieve certain precision levels, estimated with TPL-based optimum sample size formula
D (Error Level)	1-D (Precision)	Average Species Population Size	L..iners	L..crispatus	Atopobium	L..gasseri	Prevotella	Parvimonas	Sneathia	L..jensenii	Gardnerella	Peptoniphilus	Anaerococcus	Streptococcus	Corynebacterium	Ruminococcaceae.3	Mobiluncus	Aerococcus	Finegoldia	L.otu5	Megasphaera	L.otu4	Gemella	Peptostreptococcus	Lachnospiraceae.10	Lactobacillales.2	Staphylococcus	Veillonella	Escherichia.Shigella	Coriobacteriaceae.3	Dialister	Peptococcus	Allisonella	Porphyromonas	Ureaplasma	Campylobacter	Incertae_Sedis_XI.1	Incertae_Sedis_XI.2	Actinomyces	L.otu3	Facklamia	Arthrobacter	Enterococcus	Varibaculum	Segniliparus	Acinetobacter
0.01	0.99	1	410835	185871	344809	253823	362132	328988	305505	309787	250810	348078	265285	445137	260416	216364	334294	308021	250045	165384	436845	170900	386353	359419	319850	331624	348499	419526	751501	244458	203763	288709	240362	293446	314126	259489	238756	275729	266466	117487	209250	322290	549138	120062	186221	322369
		2	302585	146150	261110	211259	288124	263244	262507	250989	200486	271729	240155	420756	228995	164090	285451	239552	224887	110167	363800	135593	326701	315446	263076	242476	348039	365821	730627	181190	150538	237387	183774	250138	283811	197403	173771	207167	202962	80368.8	152707	254311	509938	76250.7	129349	246214
		3	253019	126976	221915	189751	252058	231059	240218	221914	175869	235087	226573	407117	212404	139580	260258	206792	211361	86863.8	326872	118425	296173	292261	234660	201896	347771	337652	718686	152072	126106	211706	157068	227831	267453	168221	144299	175264	173084	64361.7	127009	221404	488318	58467.1	104516	210305
		4	222858	114918	197728	175832	229241	210639	225560	203352	160259	212126	217405	397710	201366	124445	243744	186303	202260	73385.1	302968	107580	276259	276853	216380	177293	347580	318991	710332	134297	111216	195188	140508	213221	256422	150172	126473	155654	154593	54977.8	111443	200671	473537	48426.4	89846	188050
		5	201962	106359	180798	165743	212975	196051	214810	190030	149111	195873	210550	390563	193201	113845	231660	171819	195472	64388.2	285638	99855.9	261740	265462	203187	160294	347433	305229	703919	121953	100888	183269	128876	202537	248180	137517	114177	141968	141622	48652.1	100696	185937	462380	41841.8	79900.3	172423
		6	186352	99841.3	168047	157931	200546	184885	206408	179795	140581	183522	205110	384819	186777	105857	222233	160825	190095	57862.3	272216	93958.8	250445	256505	193007	147622	347312	294427	698723	112715	93166.2	174073	120090	194206	241643	127972	105024	131683	131835	44027.8	92688.6	174705	453460	37132.1	72597.1	160623
		7	174099	94643.3	157971	151614	190604	175942	199561	171573	133751	173688	200620	380028	181511	99543	214562	152080	185664	52863.5	261361	89245.3	241276	249167	184799	137692	347210	285593	694359	105452	87100.1	166658	113130	187431	236250	120421	97859.3	123571	124091	40462.6	86417.5	165739	446052	33566.2	66945.7	151279
		8	164138	90359.8	149732	146346	182392	168546	193814	164756	128103	165597	196811	375927	177071	94378.5	208131	144890	181910	48883.8	252309	85353.9	233605	242981	177972	129633	347122	278155	690601	99539.9	82165.6	160491	107428	181753	231676	114241	92049.5	116950	117751	37608.6	81329.2	158345	439734	30755.3	62407	143626
		9	155826	86742.7	142822	141852	175442	162280	188882	158967	123320	158774	193510	372345	173244	90046	202619	138831	178661	45622.9	244585	82062.5	227042	237652	172159	122916	347044	271756	687303	94600.9	78045.6	155241	102638	176888	227715	109054	87211.9	111404	112428	35258.7	77090.3	152098	434234	28472	58659.7	137197
		10	148748	83630	136911	137949	169450	156873	184577	153962	119192	152909	190605	369171	169891	86339.3	197813	133626	175804	42890.7	237876	79226	221328	232984	167121	117203	346975	266156	684366	90390.9	74535.5	150690	98534.5	172646	224230	104614	83100.3	106666	107871	33281.3	73486	146719	429374	26573.5	55498.8	131690
		11	142623	80910.5	131775	134511	164206	152137	180767	149570	115578	147790	188015	366323	166914	83117.7	193563	129085	173259	40560.3	231966	76744.6	216282	228841	162690	112264	346912	261190	681720	86744	71496.5	146689	94963.8	168896	221122	100753	79548.2	102555	103908	31588.3	70370.9	142016	425023	24965.4	52786.3	126900
		12	137251	78505.1	127255	131447	159561	147939	177357	145670	112374	143267	185680	363741	164241	80281.8	189763	125075	170968	38543.6	226698	74547.2	211777	225123	158748	107938	346854	256737	679314	83543.4	68830.4	143129	91817.1	165545	218323	97353.3	76438.1	98939.4	100417	30118	67642.5	137855	421090	23582.4	50425.9	122678
		13	132488	76355.6	123234	128690	155404	144179	174278	142172	109505	139228	183559	361383	161821	77758.5	186333	121497	168887	36777.1	221959	72581.3	207715	221756	155206	104105	346801	252707	677108	80703.4	66465.6	139930	89014.5	162520	215780	94327	73684.6	95726.3	97309.2	28826	65226.1	134135	417504	22377.9	48347.9	118919
		14	128226	74417.9	119625	126189	151651	140783	171474	139009	106914	135591	181616	359213	159611	75493	183213	118274	166983	35213.8	217659	70807.5	204024	218683	151997	100678	346752	249033	675071	78160.2	64348.8	137032	86496.1	159769	213451	91609	71223.7	92844.6	94517.8	27679.2	63066	130781	414211	21317.7	46500.4	115542
		15	124382	72658.2	116359	123905	148239	137693	168904	136127	104557	132290	179826	357205	157582	73443.3	180355	115352	165230	33818.2	213730	69195.1	200646	215861	149069	97588.3	346707	245661	673181	75864.6	62438.6	134388	84215.6	157250	211306	89149.1	69006.7	90239.8	91991.1	26652.6	61119.2	127733	411169	20375.9	44844	112484
		16	120890	71049.8	113386	121805	145117	134864	166536	133485	102399	129274	178167	355336	155706	71576.3	177722	112683	163607	32562.8	210120	67720.1	197537	213254	146381	94784.5	346664	242548	671418	73778.3	60703.2	131962	82136.8	154929	209319	86907.8	66995.3	87869.4	89688.8	25726.8	59352.6	124947	408344	19532.5	43347.9	109696
		17	117699	69571.4	110662	119865	142244	132260	164341	131050	100413	126505	176623	353590	153965	69865.8	175283	110232	162096	31426.1	206784	66363.1	194661	210833	143901	92224.1	346624	239659	669766	71870.8	59117	129722	80230.8	152780	207469	84853.7	65159.3	85699.5	87578.5	24886.5	57739.7	122384	405707	18772.1	41988	107141
		18	114768	68205.7	108153	118064	139588	129851	162298	128795	98575.9	123948	175179	351951	152341	68290.6	173015	107971	160685	30390.6	203687	65108.7	191988	208577	141601	89873.4	346587	236967	668212	70117.5	57659.4	127645	78474.3	150782	205740	82961.7	63474.4	83702.7	85634.4	24119.4	56259.1	120017	403237	18082.4	40745	104786
		19	112063	66938.6	105833	116386	137121	127612	160389	126698	96868.8	121577	173825	350408	150821	66833.2	170897	105874	159361	29442.7	200801	63943.9	189492	206464	139459	87705.1	346551	234449	666745	68498.5	56313.8	125711	76848.2	148915	204118	81210.7	61920.7	81856.8	83835.2	23415.5	54893.6	117820	400914	17453.2	39603.1	102606
		20	109555	65758.2	103677	114816	134820	125524	158599	124740	95276.6	119369	172549	348951	149393	65479.4	168911	103922	158116	28570.6	198100	62858.2	187155	204480	137456	85696.3	346517	232084	665356	66997.1	55066.2	123903	75336.7	147166	202591	79583.8	60481.9	80143.2	82163.3	22766.7	53628.8	115772	398723	16876.6	38549.4	100580
		50	73123.1	47854.7	71788.4	90078.8	99656.4	93484.2	129782	94443.4	70862	86046.1	151279	323911	126041	45429.3	137081	74538.5	137434	16698.4	155539	46291.3	149941	172080	106164	56651.3	345913	193644	641035	45093.5	36904.6	95656.4	52831.6	119161	177156	55440.3	39740.1	54920.5	57331.3	13782.1	35363	84645.5	361537	9260.88	23812.4	70436
		100	53856.1	37628.1	54362.4	74973.2	79290	74802.8	111516	76518	56643.6	67172.3	136948	306169	110834	34453.4	117052	57969.6	123606	11123.3	129531	36727.7	126791	151027	87320	41422.2	345457	168855	623228	33423	27264.8	78652.2	40393.5	101575	160060	42175.5	28923.6	41264.2	43668.2	9427.87	25807.3	66791.9	335729	5881.53	16540.1	53796.5
		500	26475.1	21531.5	28504.5	48956.4	46631.7	44576.6	78410.1	46937.7	33675.6	37799.6	108692	268633	82227.3	18128.4	81115.5	32336.3	96628.3	4330.56	84695.7	21459.8	85896.1	111547	55470.6	20021.8	344401	122851	583768	16673.8	13499.5	49927.4	21657.9	70107.1	126458	22350.9	13831.8	21246.1	23208.9	3904.15	12419	38533.9	282688	2049.72	7096.7	28773.6
		1000	19499.3	16930.2	21585.3	40746.8	37101.8	35668.7	67374.2	38028.9	26918.7	29508.5	98396.2	253919	72306.3	13748.5	69263.9	25148.4	86906	2884.7	70533.7	17026.3	72634	97899.4	45624.4	14639.5	343947	107125	567553	12358.5	9973.34	41052.1	16559	59760.4	114254	17003.2	10067	15963.1	17677.8	2670.71	9063.19	30406.2	262508	1301.77	4929.37	21976.3
0.05	0.95	1	16433.4	7434.84	13792.4	10152.9	14485.3	13159.5	12220.2	12391.5	10032.4	13923.1	10611.4	17805.5	10416.6	8654.56	13371.7	12320.8	10001.8	6615.37	17473.8	6836	15454.1	14376.7	12794	13265	13939.9	16781	30060.1	9778.31	8150.51	11548.4	9614.46	11737.8	12565	10379.6	9550.23	11029.2	10658.6	4699.46	8370.02	12891.6	21965.5	4802.48	7448.85	12894.8
		2	12103.4	5846.01	10444.4	8450.35	11525	10529.8	10500.3	10039.6	8019.43	10869.2	9606.19	16830.2	9159.82	6563.58	11418	9582.07	8995.48	4406.68	14552	5423.7	13068	12617.8	10523	9699.05	13921.6	14632.8	29225.1	7247.61	6021.52	9495.49	7350.95	10005.5	11352.4	7896.13	6950.83	8286.7	8118.5	3214.75	6108.29	10172.5	20397.5	3050.03	5173.97	9848.56
		3	10120.8	5079.05	8876.6	7590.03	10082.3	9242.35	9608.7	8876.58	7034.76	9403.47	9062.92	16284.7	8496.15	5583.22	10410.3	8271.66	8454.43	3474.55	13074.9	4737	11846.9	11690.4	9386.39	8075.83	13910.8	13506.1	28747.4	6082.89	5044.25	8468.25	6282.71	9113.23	10698.1	6728.85	5771.98	7010.55	6923.38	2574.47	5080.34	8856.14	19532.7	2338.68	4180.66	8412.18
		4	8914.33	4596.71	7909.13	7033.28	9169.65	8425.55	9022.42	8134.07	6410.35	8485.06	8696.21	15908.4	8054.65	4977.8	9749.77	7452.1	8090.4	2935.41	12118.7	4303.18	11050.4	11074.1	8655.18	7091.72	13903.2	12759.6	28413.3	5371.88	4448.65	7807.54	5620.32	8528.84	10256.9	6006.88	5058.93	6226.16	6183.72	2199.11	4457.72	8026.86	18941.5	1937.06	3593.84	7521.99
		5	8078.5	4254.36	7231.93	6629.72	8519.01	7842.04	8592.41	7601.18	5964.45	7834.91	8422.01	15622.5	7728.05	4553.78	9266.4	6872.75	7818.87	2575.53	11425.5	3994.24	10469.6	10618.5	8127.47	6411.75	13897.3	12209.2	28156.8	4878.13	4035.54	7330.76	5155.02	8101.49	9927.2	5500.67	4567.1	5678.7	5664.86	1946.08	4027.83	7437.47	18495.2	1673.67	3196.01	6896.9
		6	7454.09	3993.65	6721.89	6317.23	8021.83	7395.41	8256.33	7191.8	5623.25	7340.87	8204.4	15392.8	7471.06	4234.29	8889.3	6432.98	7603.79	2314.49	10888.6	3758.35	10017.8	10260.2	7720.28	5904.87	13892.5	11777.1	27948.9	4508.59	3726.65	6962.9	4803.58	7768.26	9665.72	5118.89	4200.95	5267.33	5273.42	1761.11	3707.54	6988.18	18138.4	1485.28	2903.88	6424.93
		7	6963.96	3785.73	6318.82	6064.55	7624.17	7037.69	7982.45	6862.93	5350.04	6947.54	8024.81	15201.1	7260.45	3981.72	8582.47	6083.19	7426.56	2114.54	10454.4	3569.81	9651.04	9966.69	7391.96	5507.69	13888.4	11423.7	27774.4	4218.08	3484	6666.32	4525.21	7497.23	9450.01	4816.85	3914.37	4942.86	4963.63	1618.51	3456.7	6629.56	17842.1	1342.65	2677.83	6051.17
		8	6565.53	3614.39	5989.26	5853.85	7295.68	6741.83	7752.56	6590.22	5124.13	6623.9	7872.43	15037.1	7082.82	3775.14	8325.25	5795.6	7276.38	1955.35	10092.4	3414.16	9344.22	9719.25	7118.87	5185.31	13884.9	11126.2	27624	3981.6	3286.62	6419.64	4297.14	7270.12	9267.06	4569.66	3681.98	4677.99	4710.03	1504.34	3253.17	6333.81	17589.3	1230.21	2496.28	5745.03
		9	6233.04	3469.71	5712.87	5674.08	7017.69	6491.21	7555.28	6358.69	4932.79	6350.97	7740.41	14893.8	6929.75	3601.84	8104.78	5553.23	7146.44	1824.92	9783.39	3282.5	9081.69	9506.09	6886.37	4916.64	13881.8	10870.2	27492.1	3784.04	3121.82	6209.64	4105.53	7075.5	9108.62	4362.17	3488.48	4456.16	4497.12	1410.35	3083.61	6083.91	17369.4	1138.88	2346.39	5487.87
		10	5949.92	3345.2	5476.45	5517.96	6778.01	6274.93	7383.07	6158.48	4767.69	6116.36	7624.2	14766.8	6795.63	3453.57	7912.51	5345.03	7032.17	1715.63	9515.03	3169.04	8853.11	9319.38	6684.83	4688.13	13879	10646.2	27374.6	3615.63	2981.42	6027.62	3941.38	6905.83	8969.19	4184.56	3324.01	4266.66	4314.83	1331.25	2939.44	5868.74	17174.9	1062.94	2219.95	5267.61
		11	5704.9	3236.42	5271.02	5380.43	6568.26	6085.49	7230.67	5982.8	4623.11	5911.61	7520.58	14652.9	6676.54	3324.71	7742.51	5163.42	6930.37	1622.41	9278.62	3069.78	8651.29	9153.64	6507.6	4490.58	13876.5	10447.6	27268.8	3469.76	2859.86	5867.56	3798.55	6755.86	8844.9	4030.13	3181.93	4102.19	4156.3	1263.53	2814.84	5680.66	17000.9	998.614	2111.45	5075.98
		12	5490.04	3140.2	5090.21	5257.88	6382.44	5917.54	7094.29	5826.8	4494.95	5730.68	7427.21	14549.7	6569.65	3211.27	7590.51	5003.01	6838.73	1541.74	9067.93	2981.89	8471.06	9004.91	6349.91	4317.51	13874.2	10269.5	27172.6	3341.73	2753.21	5725.15	3672.68	6621.78	8732.93	3894.13	3057.52	3957.58	4016.67	1204.72	2705.7	5514.22	16843.6	943.295	2017.04	4907.13
		13	5299.53	3054.22	4929.37	5147.6	6216.15	5767.15	6971.1	5686.89	4380.2	5569.14	7342.34	14455.3	6472.82	3110.34	7453.32	4859.86	6755.49	1471.08	8878.34	2903.25	8308.59	8870.22	6208.23	4164.19	13872.1	10108.3	27084.3	3228.14	2658.63	5597.2	3560.58	6500.8	8631.19	3773.08	2947.38	3829.05	3892.37	1153.04	2609.05	5365.42	16700.2	895.117	1933.92	4756.77
		14	5129.05	2976.72	4784.99	5047.56	6066.05	5631.31	6858.96	5560.34	4276.56	5423.63	7264.63	14368.5	6384.45	3019.72	7328.51	4730.98	6679.33	1408.55	8706.35	2832.3	8160.94	8747.32	6079.87	4027.1	13870.1	9961.34	27002.9	3126.41	2573.95	5481.29	3459.84	6390.76	8538.05	3664.36	2848.95	3713.78	3780.71	1107.17	2522.64	5231.23	16568.5	852.708	1860.02	4621.67
		15	4975.27	2906.33	4654.38	4956.18	5929.57	5507.72	6756.18	5445.07	4182.29	5291.59	7193.03	14288.2	6303.27	2937.73	7214.19	4614.06	6609.2	1352.73	8549.22	2767.8	8025.85	8634.43	5962.76	3903.53	13868.3	9826.44	26927.2	3034.58	2497.55	5375.54	3368.62	6289.99	8452.24	3565.96	2760.27	3609.59	3679.65	1066.11	2444.77	5109.33	16446.8	815.034	1793.76	4499.35
		16	4835.6	2841.99	4535.43	4872.2	5804.69	5394.58	6661.42	5339.4	4095.98	5170.98	7126.68	14213.5	6228.25	2863.05	7108.87	4507.31	6544.27	1302.51	8404.8	2708.8	7901.5	8530.15	5855.25	3791.38	13866.6	9701.91	26856.7	2951.13	2428.13	5278.46	3285.47	6197.16	8372.75	3476.31	2679.81	3514.78	3587.55	1029.07	2374.1	4997.87	16333.7	781.301	1733.92	4387.85
		17	4707.97	2782.86	4426.46	4794.6	5689.77	5290.41	6573.63	5242.01	4016.53	5060.19	7064.92	14143.6	6158.61	2794.63	7011.34	4409.29	6483.85	1257.04	8271.36	2654.52	7786.44	8433.34	5756.03	3688.96	13865	9586.36	26790.6	2874.83	2364.68	5188.87	3209.23	6111.21	8298.76	3394.15	2606.37	3427.98	3503.14	995.46	2309.59	4895.38	16228.3	750.886	1679.52	4285.64
		18	4590.72	2728.23	4326.12	4722.58	5583.51	5194.04	6491.91	5151.81	3943.03	4957.91	7007.17	14078.1	6093.65	2731.62	6920.61	4318.82	6427.4	1215.63	8147.5	2604.35	7679.5	8343.07	5664.02	3594.94	13863.5	9478.69	26728.5	2804.7	2306.38	5105.79	3138.97	6031.27	8229.6	3318.47	2538.97	3348.11	3425.38	964.774	2250.37	4800.68	16129.5	723.295	1629.8	4191.45
		19	4482.5	2677.54	4233.31	4655.44	5484.83	5104.5	6415.55	5067.92	3874.75	4863.07	6952.99	14016.3	6032.84	2673.33	6835.87	4234.96	6374.45	1177.71	8032.04	2557.76	7579.7	8258.57	5578.34	3508.2	13862	9377.95	26669.8	2739.94	2252.55	5028.43	3073.93	5956.61	8164.71	3248.43	2476.83	3274.27	3353.41	936.619	2195.74	4712.79	16036.6	698.13	1584.13	4104.26
		20	4382.2	2630.33	4147.09	4592.63	5392.82	5020.97	6343.94	4989.6	3811.07	4774.77	6901.97	13958	5975.71	2619.18	6756.43	4156.9	6324.63	1142.83	7924.02	2514.33	7486.21	8179.2	5498.26	3427.85	13860.7	9283.36	26614.3	2679.88	2202.65	4956.13	3013.47	5886.64	8103.62	3183.35	2419.28	3205.73	3286.53	910.669	2145.15	4630.89	15948.9	675.066	1541.98	4023.22
		50	2924.92	1914.19	2871.53	3603.15	3986.26	3739.37	5191.27	3777.73	2834.48	3441.84	6051.15	12956.4	5041.66	1817.17	5483.24	2981.54	5497.36	667.936	6221.55	1851.65	5997.65	6883.19	4246.58	2266.05	13836.5	7745.74	25641.4	1803.74	1476.18	3826.26	2113.26	4766.43	7086.26	2217.61	1589.6	2196.82	2293.25	551.282	1414.52	3385.82	14461.5	370.435	952.495	2817.44
		100	2154.24	1505.12	2174.5	2998.93	3171.6	2992.11	4460.62	3060.72	2265.75	2686.89	5477.93	12246.8	4433.36	1378.14	4682.1	2318.78	4944.24	444.93	5181.24	1469.11	5071.63	6041.06	3492.8	1656.89	13818.3	6754.18	24929.1	1336.92	1090.59	3146.09	1615.74	4062.98	6402.4	1687.02	1156.94	1650.57	1746.73	377.115	1032.29	2671.67	13429.2	235.261	661.603	2151.86
		500	1059.01	861.261	1140.18	1958.26	1865.27	1783.07	3136.4	1877.51	1347.03	1511.99	4347.7	10745.3	3289.09	725.136	3244.62	1293.45	3865.13	173.222	3387.83	858.392	3435.84	4461.86	2218.82	800.873	13776	4914.05	23350.7	666.952	539.981	1997.1	866.318	2804.28	5058.33	894.038	553.271	849.844	928.354	156.166	496.761	1541.35	11307.5	81.9888	283.868	1150.95
		1000	779.972	677.209	863.413	1629.87	1484.07	1426.75	2694.97	1521.16	1076.75	1180.34	3935.85	10156.8	2892.25	549.94	2770.56	1005.94	3476.24	115.388	2821.35	681.051	2905.36	3915.98	1824.98	585.58	13757.9	4284.99	22702.1	494.34	398.934	1642.08	662.362	2390.41	4570.18	680.128	402.681	638.525	707.111	106.828	362.528	1216.25	10500.3	52.0706	197.175	879.052
0.1	0.9	1	4108.35	1858.71	3448.09	2538.23	3621.32	3289.88	3055.05	3097.87	2508.1	3480.78	2652.85	4451.37	2604.16	2163.64	3342.94	3080.21	2500.45	1653.84	4368.45	1709	3863.53	3594.19	3198.5	3316.24	3484.99	4195.26	7515.01	2444.58	2037.63	2887.09	2403.62	2934.46	3141.26	2594.89	2387.56	2757.29	2664.66	1174.87	2092.5	3222.9	5491.38	1200.62	1862.21	3223.69
		2	3025.85	1461.5	2611.1	2112.59	2881.24	2632.44	2625.07	2509.89	2004.86	2717.29	2401.55	4207.56	2289.95	1640.9	2854.51	2395.52	2248.87	1101.67	3638	1355.93	3267.01	3154.46	2630.76	2424.76	3480.39	3658.21	7306.27	1811.9	1505.38	2373.87	1837.74	2501.38	2838.11	1974.03	1737.71	2071.67	2029.62	803.688	1527.07	2543.11	5099.38	762.507	1293.49	2462.14
		3	2530.19	1269.76	2219.15	1897.51	2520.58	2310.59	2402.18	2219.14	1758.69	2350.87	2265.73	4071.17	2124.04	1395.8	2602.58	2067.92	2113.61	868.638	3268.72	1184.25	2961.73	2922.61	2346.6	2018.96	3477.71	3376.52	7186.86	1520.72	1261.06	2117.06	1570.68	2278.31	2674.53	1682.21	1442.99	1752.64	1730.84	643.617	1270.09	2214.04	4883.18	584.671	1045.16	2103.05
		4	2228.58	1149.18	1977.28	1758.32	2292.41	2106.39	2255.6	2033.52	1602.59	2121.26	2174.05	3977.1	2013.66	1244.45	2437.44	1863.03	2022.6	733.851	3029.68	1075.8	2762.59	2768.53	2163.8	1772.93	3475.8	3189.91	7103.32	1342.97	1112.16	1951.88	1405.08	2132.21	2564.22	1501.72	1264.73	1556.54	1545.93	549.778	1114.43	2006.71	4735.37	484.264	898.46	1880.5
		5	2019.62	1063.59	1807.98	1657.43	2129.75	1960.51	2148.1	1900.3	1491.11	1958.73	2105.5	3905.63	1932.01	1138.45	2316.6	1718.19	1954.72	643.882	2856.38	998.559	2617.4	2654.62	2031.87	1602.94	3474.33	3052.29	7039.19	1219.53	1008.88	1832.69	1288.76	2025.37	2481.8	1375.17	1141.77	1419.68	1416.22	486.521	1006.96	1859.37	4623.8	418.418	799.003	1724.23
		6	1863.52	998.413	1680.47	1579.31	2005.46	1848.85	2064.08	1797.95	1405.81	1835.22	2051.1	3848.19	1867.77	1058.57	2222.33	1608.25	1900.95	578.623	2722.16	939.588	2504.45	2565.05	1930.07	1476.22	3473.12	2944.27	6987.23	1127.15	931.662	1740.73	1200.9	1942.06	2416.43	1279.72	1050.24	1316.83	1318.35	440.278	926.886	1747.05	4534.6	371.321	725.971	1606.23
		7	1740.99	946.433	1579.71	1516.14	1906.04	1759.42	1995.61	1715.73	1337.51	1736.88	2006.2	3800.28	1815.11	995.43	2145.62	1520.8	1856.64	528.635	2613.61	892.453	2412.76	2491.67	1847.99	1376.92	3472.1	2855.93	6943.59	1054.52	871.001	1666.58	1131.3	1874.31	2362.5	1204.21	978.593	1235.71	1240.91	404.626	864.175	1657.39	4460.52	335.662	669.457	1512.79
		8	1641.38	903.598	1497.32	1463.46	1823.92	1685.46	1938.14	1647.56	1281.03	1655.97	1968.11	3759.27	1770.71	943.785	2081.31	1448.9	1819.1	488.838	2523.09	853.539	2336.05	2429.81	1779.72	1296.33	3471.22	2781.55	6906.01	995.399	821.656	1604.91	1074.28	1817.53	2316.76	1142.41	920.495	1169.5	1177.51	376.086	813.292	1583.45	4397.34	307.553	624.07	1436.26
		9	1558.26	867.427	1428.22	1418.52	1754.42	1622.8	1888.82	1589.67	1233.2	1587.74	1935.1	3723.45	1732.44	900.46	2026.19	1388.31	1786.61	456.229	2445.85	820.625	2270.42	2376.52	1721.59	1229.16	3470.44	2717.56	6873.03	946.009	780.456	1552.41	1026.38	1768.88	2277.15	1090.54	872.119	1114.04	1124.28	352.587	770.903	1520.98	4342.34	284.72	586.597	1371.97
		10	1487.48	836.3	1369.11	1379.49	1694.5	1568.73	1845.77	1539.62	1191.92	1529.09	1906.05	3691.71	1698.91	863.393	1978.13	1336.26	1758.04	428.907	2378.76	792.26	2213.28	2329.84	1671.21	1172.03	3469.75	2661.56	6843.66	903.909	745.355	1506.9	985.345	1726.46	2242.3	1046.14	831.003	1066.66	1078.71	332.813	734.86	1467.19	4293.74	265.735	554.988	1316.9
		11	1426.23	809.105	1317.75	1345.11	1642.06	1521.37	1807.67	1495.7	1155.78	1477.9	1880.15	3663.23	1669.14	831.177	1935.63	1290.85	1732.59	405.603	2319.66	767.446	2162.82	2288.41	1626.9	1122.64	3469.12	2611.9	6817.2	867.44	714.965	1466.89	949.638	1688.96	2211.22	1007.53	795.482	1025.55	1039.08	315.883	703.709	1420.16	4250.23	249.654	527.863	1269
		12	1372.51	785.051	1272.55	1314.47	1595.61	1479.39	1773.57	1456.7	1123.74	1432.67	1856.8	3637.41	1642.41	802.818	1897.63	1250.75	1709.68	385.436	2266.98	745.472	2117.77	2251.23	1587.48	1079.38	3468.54	2567.37	6793.14	835.434	688.304	1431.29	918.171	1655.45	2183.23	973.533	764.381	989.394	1004.17	301.18	676.425	1378.55	4210.9	235.824	504.259	1226.78
		13	1324.88	763.556	1232.34	1286.9	1554.04	1441.79	1742.78	1421.72	1095.05	1392.28	1835.59	3613.83	1618.21	777.585	1863.33	1214.97	1688.87	367.771	2219.59	725.813	2077.15	2217.56	1552.06	1041.05	3468.01	2527.07	6771.08	807.034	664.656	1399.3	890.145	1625.2	2157.8	943.27	736.846	957.263	973.092	288.26	652.261	1341.35	4175.04	223.779	483.479	1189.19
		14	1282.26	744.179	1196.25	1261.89	1516.51	1407.83	1714.74	1390.09	1069.14	1355.91	1816.16	3592.13	1596.11	754.93	1832.13	1182.74	1669.83	352.138	2176.59	708.075	2040.24	2186.83	1519.97	1006.78	3467.52	2490.33	6750.71	781.602	643.488	1370.32	864.961	1597.69	2134.51	916.09	712.237	928.446	945.178	276.792	630.66	1307.81	4142.11	213.177	465.004	1155.42
		15	1243.82	726.582	1163.59	1239.05	1482.39	1376.93	1689.04	1361.27	1045.57	1322.9	1798.26	3572.05	1575.82	734.433	1803.55	1153.52	1652.3	338.182	2137.3	691.951	2006.46	2158.61	1490.69	975.883	3467.07	2456.61	6731.81	758.646	624.386	1343.88	842.156	1572.5	2113.06	891.491	690.067	902.398	919.911	266.526	611.192	1277.33	4111.69	203.759	448.44	1124.84
		16	1208.9	710.498	1133.86	1218.05	1451.17	1348.64	1665.36	1334.85	1023.99	1292.74	1781.67	3553.36	1557.06	715.763	1777.22	1126.83	1636.07	325.628	2101.2	677.201	1975.37	2132.54	1463.81	947.845	3466.64	2425.48	6714.18	737.783	607.032	1319.62	821.368	1549.29	2093.19	869.078	669.953	878.694	896.888	257.268	593.526	1249.47	4083.44	195.325	433.479	1096.96
		17	1176.99	695.714	1106.62	1198.65	1422.44	1322.6	1643.41	1310.5	1004.13	1265.05	1766.23	3535.9	1539.65	698.658	1752.83	1102.32	1620.96	314.261	2067.84	663.631	1946.61	2108.33	1439.01	922.241	3466.24	2396.59	6697.66	718.708	591.17	1297.22	802.308	1527.8	2074.69	848.537	651.593	856.995	875.785	248.865	577.397	1223.84	4057.07	187.721	419.88	1071.41
		18	1147.68	682.057	1081.53	1180.64	1395.88	1298.51	1622.98	1287.95	985.759	1239.48	1751.79	3519.51	1523.41	682.906	1730.15	1079.71	1606.85	303.906	2036.87	651.087	1919.88	2085.77	1416.01	898.734	3465.87	2369.67	6682.12	701.175	576.594	1276.45	784.743	1507.82	2057.4	829.617	634.744	837.027	856.344	241.194	562.591	1200.17	4032.37	180.824	407.45	1047.86
		19	1120.63	669.386	1058.33	1163.86	1371.21	1276.12	1603.89	1266.98	968.688	1215.77	1738.25	3504.08	1508.21	668.332	1708.97	1058.74	1593.61	294.427	2008.01	639.439	1894.92	2064.64	1394.59	877.051	3465.51	2344.49	6667.45	684.985	563.138	1257.11	768.482	1489.15	2041.18	812.107	619.207	818.568	838.352	234.155	548.936	1178.2	4009.14	174.532	396.031	1026.06
		20	1095.55	657.582	1036.77	1148.16	1348.2	1255.24	1585.99	1247.4	952.766	1193.69	1725.49	3489.51	1493.93	654.794	1689.11	1039.22	1581.16	285.706	1981	628.582	1871.55	2044.8	1374.56	856.963	3465.17	2320.84	6653.56	669.971	550.662	1239.03	753.367	1471.66	2025.91	795.838	604.819	801.432	821.633	227.667	536.288	1157.72	3987.23	168.766	385.494	1005.8
		50	731.231	478.547	717.884	900.788	996.564	934.842	1297.82	944.434	708.62	860.461	1512.79	3239.11	1260.41	454.293	1370.81	745.385	1374.34	166.984	1555.39	462.913	1499.41	1720.8	1061.64	566.513	3459.13	1936.44	6410.35	450.935	369.046	956.564	528.316	1191.61	1771.56	554.403	397.401	549.205	573.313	137.821	353.63	846.455	3615.37	92.6088	238.124	704.36
		100	538.561	376.281	543.624	749.732	792.9	748.028	1115.16	765.18	566.436	671.723	1369.48	3061.69	1108.34	344.534	1170.52	579.696	1236.06	111.233	1295.31	367.277	1267.91	1510.27	873.2	414.222	3454.57	1688.55	6232.28	334.23	272.648	786.522	403.935	1015.75	1600.6	421.755	289.236	412.642	436.682	94.2787	258.073	667.919	3357.29	58.8153	165.401	537.965
		500	264.751	215.315	285.045	489.564	466.317	445.766	784.101	469.377	336.756	377.996	1086.92	2686.33	822.273	181.284	811.155	323.363	966.283	43.3056	846.957	214.598	858.961	1115.47	554.706	200.218	3444.01	1228.51	5837.68	166.738	134.995	499.274	216.579	701.071	1264.58	223.509	138.318	212.461	232.089	39.0415	124.19	385.339	2826.88	20.4972	70.967	287.736
		1000	194.993	169.302	215.853	407.468	371.018	356.687	673.742	380.289	269.187	295.085	983.962	2539.19	723.063	137.485	692.639	251.484	869.06	28.847	705.337	170.263	726.34	978.994	456.244	146.395	3439.47	1071.25	5675.53	123.585	99.7334	410.521	165.59	597.604	1142.54	170.032	100.67	159.631	176.778	26.7071	90.6319	304.062	2625.08	13.0177	49.2937	219.763
0.15	0.85	1	1825.93	826.093	1532.49	1128.1	1609.47	1462.17	1357.8	1376.83	1114.71	1547.01	1179.04	1978.39	1157.4	961.617	1485.75	1368.98	1111.31	735.041	1941.53	759.555	1717.12	1597.42	1421.56	1473.89	1548.88	1864.56	3340.01	1086.48	905.612	1283.15	1068.27	1304.2	1396.11	1153.29	1061.14	1225.46	1184.29	522.162	930.002	1432.4	2440.61	533.609	827.65	1432.75
		2	1344.82	649.556	1160.49	938.927	1280.55	1169.97	1166.7	1115.51	891.048	1207.68	1067.35	1870.03	1017.76	729.287	1268.67	1064.67	999.498	489.631	1616.89	602.633	1452	1401.98	1169.23	1077.67	1546.84	1625.87	3247.23	805.29	669.058	1055.05	816.772	1111.72	1261.38	877.348	772.314	920.744	902.055	357.195	678.699	1130.27	2266.39	338.892	574.886	1094.28
		3	1124.53	564.339	986.288	843.336	1120.26	1026.93	1067.63	986.286	781.64	1044.83	1006.99	1809.41	944.017	620.358	1156.7	919.074	939.381	386.061	1452.77	526.333	1316.32	1298.94	1042.93	897.315	1545.65	1500.67	3194.16	675.876	560.472	940.917	698.079	1012.58	1188.68	747.65	641.331	778.95	769.264	286.052	564.482	984.016	2170.3	259.854	464.518	934.687
		4	990.481	510.746	878.792	781.476	1018.85	936.173	1002.49	903.785	712.261	942.784	966.245	1767.6	894.961	553.088	1083.31	828.011	898.933	326.156	1346.53	478.131	1227.82	1230.46	961.687	787.969	1544.8	1417.74	3157.03	596.875	494.294	867.504	624.48	947.649	1139.65	667.431	562.104	691.796	687.08	244.346	495.303	891.873	2104.61	215.228	399.316	835.776
		5	897.611	472.707	803.547	736.635	946.557	871.338	954.712	844.576	662.717	870.546	935.779	1735.84	858.673	505.976	1029.6	763.639	868.763	286.17	1269.5	443.804	1163.29	1179.83	903.053	712.417	1544.15	1356.58	3128.53	542.014	448.393	814.529	572.78	900.165	1103.02	611.185	507.455	630.967	629.429	216.231	447.537	826.386	2055.02	185.963	355.113	766.322
		6	828.232	443.739	746.876	701.915	891.314	821.712	917.369	799.089	624.805	815.652	911.6	1710.31	830.118	470.477	987.7	714.776	844.865	257.166	1209.85	417.594	1113.09	1140.02	857.809	656.096	1543.61	1308.57	3105.43	500.954	414.072	773.656	533.731	863.14	1073.97	568.766	466.772	585.259	585.935	195.679	411.949	776.465	2015.38	165.032	322.654	713.881
		7	773.774	420.637	702.091	673.839	847.13	781.965	886.939	762.548	594.449	771.949	891.646	1689.01	806.717	442.413	953.608	675.91	825.173	234.949	1161.6	396.646	1072.34	1107.41	821.329	611.966	1543.16	1269.3	3086.04	468.675	387.111	740.702	502.801	833.026	1050	535.206	434.93	549.206	551.515	179.834	384.078	736.617	1982.46	149.183	297.536	672.352
		8	729.503	401.599	665.474	650.428	810.631	749.092	861.395	732.247	569.347	735.989	874.714	1670.78	786.981	419.46	925.028	643.955	808.487	217.261	1121.37	379.351	1038.25	1079.92	790.985	576.145	1542.76	1236.25	3069.34	442.4	365.18	713.293	477.46	807.791	1029.67	507.74	409.109	519.776	523.337	167.149	361.463	703.757	1954.37	136.69	277.364	638.337
		9	692.56	385.523	634.763	630.454	779.744	721.246	839.476	706.521	548.088	705.663	860.046	1654.87	769.973	400.205	900.531	617.026	794.049	202.768	1087.04	364.722	1009.08	1056.23	765.152	546.293	1542.42	1207.8	3054.68	420.449	346.869	689.96	456.17	786.167	1012.07	484.686	387.608	495.129	499.68	156.705	342.623	675.99	1929.93	126.542	260.71	609.764
		10	661.102	371.689	608.494	613.107	753.113	697.214	820.341	684.275	529.744	679.596	847.134	1640.76	755.07	383.73	879.168	593.892	781.352	190.625	1057.23	352.116	983.679	1035.49	742.759	520.903	1542.11	1182.91	3041.63	401.737	331.269	669.735	437.931	767.315	996.576	464.951	369.335	474.073	479.426	147.917	326.604	652.082	1908.33	118.104	246.661	585.29
		11	633.878	359.602	585.669	597.826	729.806	676.165	803.408	664.756	513.679	656.846	835.62	1628.1	741.838	369.412	860.279	573.713	770.041	180.268	1030.96	341.087	961.254	1017.07	723.067	498.953	1541.83	1160.84	3029.87	385.529	317.762	651.951	422.061	750.651	982.766	447.792	353.548	455.798	461.811	140.393	312.76	631.184	1888.99	110.957	234.606	563.998
		12	610.004	348.912	565.579	584.208	709.16	657.505	788.254	647.422	499.439	636.742	825.246	1616.63	729.961	356.808	843.39	555.89	759.859	171.305	1007.55	331.321	941.229	1000.55	705.546	479.723	1541.57	1141.05	3019.17	371.304	305.913	636.128	408.076	735.754	970.326	432.681	339.725	439.731	446.297	133.858	300.633	612.691	1871.51	104.811	224.115	545.237
		13	588.837	339.358	547.708	571.956	690.683	640.794	774.567	631.876	486.689	618.793	815.816	1606.15	719.203	345.593	828.146	539.985	750.61	163.454	986.483	322.584	923.177	985.58	689.803	462.688	1541.34	1123.14	3009.37	358.682	295.403	621.911	395.62	722.311	959.021	419.231	327.487	425.45	432.485	128.115	289.894	596.157	1855.57	99.4575	214.88	528.53
		14	569.895	330.746	531.666	560.841	674.005	625.701	762.106	617.816	475.174	602.626	807.181	1596.5	709.384	335.525	814.279	525.664	742.148	156.506	967.372	314.7	906.771	971.924	675.541	447.456	1541.12	1106.82	3000.32	347.379	285.995	609.032	384.427	710.084	948.672	407.151	316.55	412.643	420.079	123.019	280.293	581.248	1840.94	94.7454	206.669	513.519
		15	552.808	322.925	517.153	550.687	658.841	611.969	750.686	605.008	464.699	587.954	799.225	1587.58	700.363	326.415	801.577	512.674	734.356	150.303	949.913	307.534	891.761	959.381	662.529	433.726	1540.92	1091.83	2991.92	337.176	277.505	597.282	374.291	698.887	939.137	396.218	306.696	401.066	408.849	118.456	271.641	567.703	1827.42	90.5593	199.307	499.927
		16	537.289	315.777	503.936	541.355	644.965	599.397	740.158	593.267	455.109	574.553	791.853	1579.27	692.028	318.117	789.875	500.813	727.141	144.724	933.867	300.978	877.944	947.794	650.583	421.264	1540.73	1077.99	2984.08	327.903	269.792	586.496	365.052	688.573	930.305	386.257	297.757	390.531	398.617	114.342	263.789	555.318	1814.86	86.8112	192.657	487.539
		17	523.107	309.206	491.829	532.734	632.197	587.823	730.403	582.445	446.281	562.244	784.991	1571.51	684.29	310.515	779.038	489.921	720.428	139.671	919.04	294.947	865.16	937.038	639.559	409.885	1540.55	1065.15	2976.74	319.426	262.742	576.541	356.581	679.023	922.084	377.128	289.597	380.887	389.238	110.607	256.621	543.931	1803.14	83.4317	186.614	476.182
		18	510.08	303.137	480.68	524.731	620.39	577.115	721.324	572.424	438.115	550.879	778.575	1564.23	677.073	303.514	768.957	479.869	714.155	135.07	905.278	289.372	853.278	927.008	629.336	399.437	1540.39	1053.19	2969.83	311.633	256.264	567.31	348.775	670.141	914.4	368.718	282.108	372.012	380.598	107.197	250.041	533.409	1792.16	80.3661	181.089	465.716
		19	498.056	297.505	470.367	517.271	609.425	567.166	712.839	563.103	430.528	540.341	772.554	1557.37	670.316	297.036	759.541	470.551	708.272	130.856	892.449	284.195	842.189	917.619	619.816	389.8	1540.23	1041.99	2963.31	304.438	250.283	558.715	341.548	661.846	907.19	360.937	275.203	363.808	372.601	104.069	243.972	523.643	1781.84	77.57	176.014	456.028
		20	486.911	292.259	460.788	510.293	599.202	557.886	704.882	554.4	423.452	530.53	766.886	1550.89	663.968	291.019	750.715	461.878	702.736	126.981	880.446	279.37	831.801	908.8	610.917	380.873	1540.08	1031.48	2957.14	297.765	244.739	550.681	334.83	654.071	900.403	353.706	268.808	356.192	365.17	101.185	238.35	514.543	1772.1	75.0073	171.331	447.024
		50	324.991	212.688	319.059	400.35	442.918	415.485	576.807	419.748	314.942	382.427	672.35	1439.6	560.184	201.908	609.249	331.282	610.818	74.2151	691.283	205.739	666.406	764.798	471.842	251.784	1537.39	860.638	2849.04	200.416	164.02	425.14	234.807	529.604	787.362	246.401	176.623	244.091	254.806	61.2536	157.169	376.202	1606.83	41.1595	105.833	313.049
		100	239.361	167.236	241.611	333.214	352.4	332.457	495.625	340.08	251.75	298.543	608.659	1360.75	492.596	153.126	520.233	257.642	549.36	49.4367	575.693	163.234	563.515	671.229	388.089	184.099	1535.37	750.464	2769.9	148.547	121.177	349.565	179.527	451.442	711.378	187.447	128.549	183.396	194.081	41.9016	114.699	296.853	1492.13	26.1401	73.5114	239.096
		500	117.667	95.6957	126.687	217.584	207.252	198.118	348.489	208.612	149.67	167.998	483.078	1193.92	365.455	80.5707	360.513	143.717	429.459	19.2469	376.425	95.3769	381.76	495.762	246.536	88.9858	1530.67	546.006	2594.52	74.1058	59.9979	221.9	96.2575	311.587	562.036	99.3376	61.4746	94.4272	103.15	17.3518	55.1957	171.262	1256.39	9.10987	31.5409	127.883
		1000	86.6635	75.2455	95.9348	181.097	164.897	158.527	299.441	169.017	119.639	131.149	437.316	1128.53	321.361	61.1045	307.839	111.771	386.249	12.8209	313.483	75.6723	322.818	435.108	202.775	65.0644	1528.65	476.11	2522.46	54.9267	44.326	182.454	73.5958	265.602	507.797	75.5698	44.7423	70.9473	78.5679	11.8698	40.2808	135.139	1166.7	5.78562	21.9083	97.6724
0.2	0.8	1	1027.09	464.677	862.023	634.558	905.329	822.469	763.763	774.468	627.026	870.195	663.212	1112.84	651.039	540.91	835.734	770.052	625.114	413.461	1092.11	427.25	965.881	898.546	799.626	829.061	871.246	1048.82	1878.75	611.144	509.407	721.773	600.904	733.614	785.314	648.723	596.889	689.323	666.165	293.716	523.126	805.724	1372.84	300.155	465.553	805.922
		2	756.464	365.376	652.775	528.147	720.31	658.111	656.267	627.474	501.215	679.322	600.387	1051.89	572.489	410.224	713.627	598.879	562.218	275.417	909.499	338.981	816.752	788.614	657.69	606.19	870.098	914.552	1826.57	452.976	376.345	593.468	459.434	625.344	709.528	493.508	434.427	517.919	507.406	200.922	381.768	635.779	1274.85	190.627	323.373	615.535
		3	632.548	317.44	554.787	474.377	630.145	577.647	600.544	554.786	439.672	587.717	566.433	1017.79	531.01	348.951	650.646	516.979	528.402	217.159	817.181	296.062	740.432	730.653	586.649	504.74	869.427	844.129	1796.71	380.18	315.266	529.266	392.67	569.577	668.633	420.553	360.749	438.159	432.711	160.904	317.521	553.509	1220.8	146.168	261.291	525.761
		4	557.146	287.294	494.32	439.58	573.103	526.597	563.901	508.379	400.647	530.316	543.513	994.275	503.416	311.112	609.361	465.756	505.65	183.463	757.421	268.949	690.648	692.131	540.949	443.233	868.951	797.477	1775.83	335.742	278.041	487.971	351.27	533.053	641.055	375.43	316.183	389.135	386.482	137.444	278.608	501.678	1183.84	121.066	224.615	470.124
		5	504.906	265.897	451.995	414.357	532.438	490.128	537.026	475.074	372.778	489.682	526.376	976.407	483.003	284.611	579.15	429.547	488.679	160.97	714.094	249.64	654.349	663.656	507.967	400.735	868.582	763.074	1759.8	304.883	252.221	458.173	322.189	506.343	620.45	343.792	285.444	354.919	354.054	121.63	251.739	464.842	1155.95	104.604	199.751	431.056
		6	465.88	249.603	420.118	394.827	501.364	462.213	516.02	449.488	351.453	458.804	512.775	962.047	466.941	264.643	555.581	402.061	475.237	144.656	680.539	234.897	626.111	641.262	482.518	369.054	868.28	736.069	1746.81	281.787	232.915	435.181	300.224	485.516	604.107	319.931	262.559	329.208	329.589	110.069	231.722	436.761	1133.65	92.8303	181.493	401.558
		7	435.248	236.608	394.926	379.034	476.511	439.855	498.903	428.933	334.377	434.221	501.551	950.07	453.778	248.857	536.404	380.199	464.16	132.159	653.403	223.113	603.19	622.918	461.998	344.231	868.026	713.983	1735.9	263.63	217.75	416.645	282.825	468.577	590.626	301.053	244.648	308.929	310.227	101.157	216.044	414.347	1115.13	83.9155	167.364	378.198
		8	410.345	225.899	374.329	365.865	455.98	421.364	484.535	411.889	320.258	413.994	492.027	939.816	442.677	235.946	520.328	362.225	454.774	122.21	630.772	213.385	584.014	607.453	444.929	324.082	867.805	695.389	1726.5	248.85	205.414	401.228	268.571	454.382	579.191	285.604	230.124	292.374	294.377	94.0214	203.323	395.863	1099.33	76.8883	156.018	359.064
		9	389.565	216.857	357.054	354.63	438.606	405.701	472.205	397.418	308.299	396.935	483.776	930.864	433.11	225.115	506.549	347.077	446.652	114.057	611.462	205.156	567.606	594.131	430.398	307.29	867.611	679.389	1718.26	236.502	195.114	388.103	256.596	442.219	569.289	272.636	218.03	278.51	281.07	88.1467	192.726	380.245	1085.59	71.1799	146.649	342.992
		10	371.87	209.075	342.278	344.872	423.626	392.183	461.442	384.905	297.981	382.273	476.513	922.927	424.727	215.848	494.532	334.064	439.511	107.227	594.69	198.065	553.319	582.461	417.802	293.008	867.437	665.389	1710.92	225.977	186.339	376.726	246.336	431.615	560.574	261.535	207.751	266.666	269.677	83.2034	183.715	366.796	1073.43	66.4337	138.747	329.226
		11	356.556	202.276	329.439	336.277	410.516	380.343	451.917	373.925	288.945	369.476	470.036	915.807	417.284	207.794	483.907	322.714	433.148	101.401	579.914	191.861	540.706	572.102	406.725	280.661	867.279	652.974	1704.3	216.86	178.741	366.722	237.41	422.241	552.806	251.883	198.871	256.387	259.769	78.9708	175.927	355.041	1062.56	62.4134	131.966	317.249
		12	343.127	196.263	318.138	328.617	398.902	369.846	443.393	364.175	280.935	358.168	464.201	909.354	410.603	200.704	474.407	312.688	427.421	96.359	566.746	186.368	529.442	562.807	396.87	269.844	867.136	641.842	1698.28	208.858	172.076	357.822	229.543	413.862	545.808	243.383	191.095	247.349	251.042	75.295	169.106	344.639	1052.73	58.956	126.065	306.696
		13	331.221	190.889	308.086	321.725	388.509	360.447	435.694	355.43	273.762	348.071	458.896	903.458	404.552	194.396	465.832	303.741	422.218	91.9427	554.896	181.453	519.287	554.389	388.014	260.262	867.004	631.769	1692.77	201.759	166.164	349.825	222.536	406.3	539.449	235.817	184.211	239.316	243.273	72.065	163.065	335.339	1043.76	55.9448	120.87	297.298
		14	320.566	186.045	299.062	315.473	379.128	351.957	428.685	347.522	267.285	338.977	454.04	898.033	399.028	188.733	458.032	295.686	417.458	88.0345	544.147	177.019	510.059	546.707	379.992	251.694	866.881	622.584	1687.68	195.4	160.872	342.581	216.24	399.422	533.628	229.022	178.059	232.112	236.295	69.198	157.665	326.952	1035.53	53.2943	116.251	288.854
		15	310.955	181.646	290.899	309.761	370.598	344.233	422.261	340.317	261.393	330.724	449.564	893.012	393.954	183.608	450.887	288.379	413.075	84.5455	534.326	172.988	501.615	539.652	372.672	243.971	866.767	614.152	1682.95	189.661	156.097	335.971	210.539	393.124	528.265	222.873	172.517	225.6	229.978	66.6316	152.798	319.333	1027.92	50.9396	112.11	281.209
		16	302.225	177.625	283.464	304.512	362.793	337.161	416.339	333.713	255.999	323.186	445.418	888.341	389.266	178.941	444.304	281.707	409.017	81.4071	525.3	169.3	493.843	533.134	365.953	236.961	866.661	606.369	1678.54	184.446	151.758	329.904	205.342	387.323	523.297	217.269	167.488	219.674	224.222	64.3171	148.382	312.367	1020.86	48.8313	108.37	274.241
		17	294.248	173.929	276.654	299.663	355.611	330.65	410.852	327.626	251.033	316.262	441.557	883.975	384.913	174.665	438.209	275.58	405.241	78.5651	516.96	165.908	486.653	527.084	359.752	230.56	866.561	599.148	1674.41	179.677	147.792	324.304	200.577	381.951	518.672	212.134	162.898	214.249	218.946	62.2162	144.349	305.961	1014.27	46.9304	104.97	267.852
		18	286.92	170.514	270.383	295.161	348.969	324.627	405.745	321.988	246.44	309.87	437.948	879.878	380.853	170.726	432.538	269.926	401.712	75.9766	509.219	162.772	479.969	521.442	354.001	224.684	866.467	592.418	1670.53	175.294	144.149	319.112	196.186	376.954	514.35	207.404	158.686	209.257	214.086	60.2984	140.648	300.042	1008.09	45.2059	101.863	261.965
		19	280.156	167.346	264.582	290.965	342.802	319.031	400.972	316.745	242.172	303.942	434.562	876.021	377.053	167.083	427.242	264.685	398.403	73.6066	502.002	159.86	473.731	516.161	348.646	219.263	866.378	586.122	1666.86	171.246	140.784	314.277	192.121	372.288	510.294	203.027	154.802	204.642	209.588	58.5387	137.234	294.549	1002.29	43.6331	99.0079	256.516
		20	273.887	164.395	259.193	287.04	337.051	313.811	396.496	311.85	238.192	298.423	431.373	872.377	373.482	163.698	422.277	259.806	395.289	71.4266	495.251	157.145	467.888	511.2	343.641	214.241	866.293	580.21	1663.39	167.493	137.665	309.758	188.342	367.915	506.477	198.96	151.205	200.358	205.408	56.9168	134.072	289.431	996.808	42.1916	96.3736	251.451
		50	182.808	119.637	179.471	225.197	249.141	233.711	324.454	236.108	177.155	215.115	378.197	809.776	315.103	113.573	342.703	186.346	343.585	41.746	388.847	115.728	374.853	430.199	265.411	141.628	864.783	484.109	1602.59	112.734	92.2614	239.141	132.079	297.902	442.891	138.601	99.3503	137.301	143.328	34.4551	88.4076	211.614	903.843	23.1522	59.5309	176.09
		100	134.64	94.0703	135.906	187.433	198.225	187.007	278.789	191.295	141.609	167.931	342.371	765.423	277.085	86.1335	292.631	144.924	309.015	27.8081	323.827	91.8192	316.977	377.567	218.3	103.555	863.643	422.136	1558.07	83.5575	68.1619	196.63	100.984	253.936	400.15	105.439	72.3089	103.16	109.171	23.5697	64.5183	166.98	839.323	14.7038	41.3502	134.491
		500	66.1878	53.8288	71.2613	122.391	116.579	111.442	196.025	117.344	84.1891	94.4991	271.731	671.582	205.568	45.321	202.789	80.8408	241.571	10.8264	211.739	53.6495	214.74	278.866	138.677	50.0545	861.002	307.128	1459.42	41.6845	33.7488	124.818	54.1449	175.268	316.145	55.8774	34.5794	53.1153	58.0221	9.76038	31.0476	96.3346	706.719	5.1243	17.7417	71.9341
		1000	48.7482	42.3256	53.9633	101.867	92.7544	89.1716	168.436	95.0723	67.2967	73.7712	245.99	634.798	180.766	34.3713	173.16	62.8709	217.265	7.21175	176.334	42.5657	181.585	244.749	114.061	36.5987	859.867	267.812	1418.88	30.8963	24.9333	102.63	41.3976	149.401	285.636	42.508	25.1675	39.9078	44.1945	6.67677	22.658	76.0155	656.271	3.25441	12.3234	54.9407
0.25	0.75	1	657.336	297.394	551.695	406.117	579.411	526.38	488.808	495.659	401.297	556.925	424.456	712.219	416.665	346.182	534.87	492.833	400.073	264.615	698.952	273.44	618.164	575.07	511.76	530.599	557.598	671.242	1202.4	391.132	326.02	461.935	384.579	469.513	502.601	415.183	382.009	441.167	426.345	187.978	334.801	515.663	878.62	192.099	297.954	515.79
		2	484.137	233.84	417.776	338.014	460.998	421.191	420.011	401.583	320.777	434.766	384.248	673.209	366.393	262.543	456.721	383.283	359.819	176.267	582.079	216.948	522.721	504.713	420.922	387.962	556.863	585.314	1169	289.905	240.861	379.82	294.038	400.22	454.098	315.845	278.033	331.468	324.74	128.59	244.332	406.898	815.901	122.001	206.959	393.943
		3	404.831	203.162	355.064	303.601	403.293	369.694	384.348	355.063	281.39	376.139	362.517	651.388	339.846	223.329	416.413	330.867	338.177	138.982	522.996	189.48	473.877	467.618	375.455	323.033	556.433	540.243	1149.9	243.315	201.77	338.73	251.309	364.529	427.925	269.154	230.879	280.422	276.935	102.979	203.214	354.246	781.309	93.5474	167.226	336.487
		4	356.573	183.868	316.365	281.331	366.786	337.022	360.897	325.363	256.414	339.402	347.848	636.336	322.186	199.112	389.991	298.084	323.616	117.416	484.749	172.127	442.014	442.964	346.207	283.669	556.128	510.385	1136.53	214.875	177.946	312.302	224.813	341.154	410.275	240.275	202.357	249.046	247.349	87.9645	178.309	321.074	757.659	77.4822	143.754	300.879
		5	323.14	170.174	289.277	265.189	340.761	313.682	343.696	304.047	238.578	313.397	336.88	624.901	309.122	182.151	370.656	274.91	312.755	103.021	457.02	159.769	418.783	424.74	325.099	256.47	555.892	488.367	1126.27	195.125	161.422	293.23	206.201	324.06	397.088	220.027	182.684	227.148	226.595	77.8433	161.113	297.499	739.808	66.9468	127.841	275.876
		6	298.164	159.746	268.876	252.689	320.873	295.816	330.253	287.672	224.93	293.635	328.176	615.71	298.842	169.372	355.572	257.319	304.151	92.5796	435.545	150.334	400.711	410.407	308.811	236.195	555.699	471.084	1117.96	180.344	149.066	278.516	192.143	310.73	386.629	204.756	168.038	210.693	210.937	70.4444	148.302	279.527	725.536	59.4114	116.155	256.997
		7	278.559	151.429	252.753	242.582	304.967	281.507	319.298	274.517	214.001	277.902	320.993	608.045	290.418	159.269	343.299	243.328	297.062	84.5816	418.178	142.793	386.041	398.668	295.678	220.308	555.536	456.949	1110.97	168.723	139.36	266.653	181.008	299.889	378	192.674	156.575	197.714	198.545	64.7402	138.268	265.182	713.684	53.7059	107.113	242.047
		8	262.621	144.576	239.57	234.154	291.827	269.673	310.102	263.609	204.965	264.956	314.897	601.483	283.313	151.006	333.01	231.824	291.055	78.2141	403.694	136.566	373.769	388.77	284.755	207.412	555.395	445.049	1104.96	159.264	131.465	256.786	171.886	290.805	370.682	182.786	147.279	187.119	188.401	60.1737	130.127	253.352	703.574	49.2085	99.8512	229.801
		9	249.322	138.788	228.515	226.963	280.708	259.648	302.211	254.348	197.312	254.039	309.617	595.753	277.19	144.074	324.191	222.129	285.858	72.9967	391.335	131.3	363.268	380.244	275.455	196.666	555.271	434.809	1099.68	151.361	124.873	248.386	164.221	283.02	364.345	174.487	139.539	178.246	179.885	56.4139	123.344	243.357	694.775	45.5551	93.8556	219.515
		10	237.997	133.808	219.058	220.718	271.121	250.997	295.323	246.339	190.708	244.655	304.968	590.674	271.825	138.143	316.5	213.801	281.287	68.6251	380.601	126.762	354.124	372.775	267.393	187.525	555.159	425.849	1094.99	144.625	119.257	241.105	157.655	276.233	358.768	167.382	132.961	170.666	172.593	53.2501	117.578	234.75	686.998	42.5175	88.798	210.704
		11	228.196	129.457	210.841	215.217	262.73	243.42	289.227	239.312	184.925	236.465	300.823	586.116	267.062	132.988	309.701	206.537	277.215	64.8965	371.145	122.791	346.052	366.146	260.304	179.623	555.059	417.903	1090.75	138.79	114.394	234.702	151.942	270.234	353.796	161.205	127.277	164.087	166.252	50.5413	112.593	227.226	680.037	39.9446	84.4581	203.039
		12	219.601	125.608	203.609	210.315	255.297	236.702	283.772	233.072	179.798	229.227	297.088	581.986	262.786	128.451	303.62	200.121	273.549	61.6698	362.717	119.275	338.843	360.196	253.997	172.7	554.967	410.779	1086.9	133.669	110.129	229.006	146.907	264.871	349.317	155.765	122.301	158.303	160.667	48.1888	108.228	220.569	673.744	37.7318	80.6815	196.285
		13	211.981	122.169	197.175	205.904	248.646	230.686	278.844	227.475	175.208	222.765	293.694	578.213	258.913	124.414	298.133	194.394	270.22	58.8433	355.134	116.13	332.344	354.809	248.329	166.568	554.882	404.332	1083.37	129.125	106.345	223.888	142.423	260.032	345.248	150.923	117.895	153.162	155.695	46.1216	104.362	214.617	668.007	35.8047	77.3567	190.271
		14	205.162	119.069	191.4	201.903	242.642	225.252	274.358	222.414	171.063	216.945	290.585	574.741	255.378	120.789	293.14	189.239	267.173	56.3421	348.254	113.292	326.438	349.893	243.195	161.084	554.804	398.453	1080.11	125.056	102.958	219.252	138.394	255.63	341.522	146.574	113.958	148.551	151.228	44.2867	100.906	209.249	662.738	34.1083	74.4007	184.867
		15	199.011	116.253	186.175	198.247	237.183	220.309	270.247	217.803	167.291	211.663	287.721	571.528	252.131	117.509	288.568	184.562	264.368	54.1091	341.969	110.712	321.034	345.377	238.51	156.141	554.731	393.058	1077.09	121.383	99.9018	215.022	134.745	251.599	338.089	142.638	110.411	144.384	147.186	42.6442	97.7908	204.373	657.871	32.6014	71.7503	179.974
		16	193.424	113.68	181.417	194.888	232.187	215.783	266.457	213.576	163.839	206.839	285.067	568.538	249.13	114.522	284.355	180.293	261.771	52.1005	336.192	108.352	316.06	341.206	234.21	151.655	554.663	388.076	1074.27	118.045	97.1251	211.138	131.419	247.886	334.91	139.052	107.192	140.591	143.502	41.1629	94.9642	199.915	653.35	31.252	69.3566	175.514
		17	188.319	111.314	177.058	191.784	227.591	211.616	262.945	209.68	160.661	202.408	282.597	565.744	246.344	111.785	280.454	176.372	259.354	50.2817	330.855	106.181	311.458	337.334	230.241	147.559	554.599	383.454	1071.62	114.993	94.5871	207.555	128.369	244.448	331.95	135.766	104.255	137.119	140.126	39.8184	92.3835	195.815	649.131	30.0354	67.1809	171.425
		18	183.629	109.129	173.045	188.903	223.34	207.761	259.677	206.073	157.721	198.317	280.287	563.122	243.746	109.265	276.824	172.753	257.096	48.625	325.9	104.174	307.18	333.723	226.561	143.797	554.539	379.147	1069.14	112.188	92.255	204.232	125.559	241.251	329.184	132.739	101.559	133.924	137.015	38.591	90.0146	192.027	645.179	28.9318	65.1921	167.658
		19	179.3	107.102	169.332	186.218	219.393	204.18	256.622	202.717	154.99	194.523	278.12	560.653	241.314	106.933	273.435	169.398	254.978	47.1082	321.282	102.31	303.188	330.343	223.134	140.328	554.482	375.118	1066.79	109.598	90.102	201.137	122.957	238.264	326.588	129.937	99.0731	130.971	134.136	37.4648	87.8298	188.511	641.463	27.9252	63.365	164.17
		20	175.288	105.213	165.884	183.705	215.713	200.839	253.758	199.584	152.443	190.991	276.079	558.321	239.029	104.767	270.257	166.276	252.985	45.713	316.961	100.573	299.448	327.168	219.93	137.114	554.427	371.335	1064.57	107.195	88.1059	198.245	120.539	235.466	324.145	127.334	96.771	128.229	131.461	36.4267	85.8061	185.236	637.957	27.0026	61.6791	160.929
		50	116.997	76.5675	114.861	144.126	159.45	149.575	207.651	151.109	113.379	137.674	242.046	518.257	201.666	72.6869	219.33	119.262	219.894	26.7175	248.862	74.0662	239.906	275.327	169.863	90.6421	553.461	309.83	1025.66	72.1496	59.0473	153.05	84.5306	190.657	283.45	88.7045	63.5842	87.8728	91.73	22.0513	56.5808	135.433	578.46	14.8174	38.0998	112.698
		100	86.1698	60.205	86.9799	119.957	126.864	119.684	178.425	122.429	90.6298	107.476	219.117	489.871	177.334	55.1254	187.284	92.7513	197.77	17.7972	207.249	58.7643	202.865	241.643	139.712	66.2755	552.732	270.167	997.166	53.4768	43.6236	125.843	64.6297	162.519	256.096	67.4808	46.2777	66.0227	69.8692	15.0846	41.2917	106.867	537.167	9.41045	26.4641	86.0744
		500	42.3602	34.4505	45.6073	78.3303	74.6108	71.3226	125.456	75.1003	53.881	60.4794	173.908	429.813	131.564	29.0054	129.785	51.7381	154.605	6.92889	135.513	34.3357	137.434	178.474	88.753	32.0349	551.041	196.562	934.029	26.6781	21.5993	79.8838	34.6527	112.171	202.333	35.7615	22.1308	33.9938	37.1342	6.24664	19.8704	61.6542	452.3	3.27955	11.3547	46.0378
		1000	31.1989	27.0884	34.5365	65.1948	59.3628	57.0698	107.799	60.8463	43.0699	47.2136	157.434	406.271	115.69	21.9976	110.822	40.2374	139.05	4.61552	112.854	27.242	116.214	156.639	72.9991	23.4232	550.315	171.399	908.084	19.7736	15.9573	65.6834	26.4945	95.6166	182.807	27.2051	16.1072	25.541	28.2845	4.27313	14.5011	48.6499	420.013	2.08282	7.88699	35.1621
0.3	0.7	1	456.483	206.523	383.121	282.026	402.368	365.542	339.45	344.208	278.678	386.753	294.761	494.596	289.351	240.404	371.437	342.245	277.828	183.76	485.383	189.889	429.281	399.354	355.389	368.471	387.221	466.14	835.002	271.62	226.403	320.788	267.068	326.051	349.028	288.322	265.284	306.366	296.073	130.541	232.5	358.1	610.153	133.402	206.913	358.188
		2	336.206	162.389	290.122	234.732	320.138	292.494	291.674	278.877	222.762	301.921	266.839	467.506	254.439	182.322	317.167	266.169	249.875	122.408	404.222	150.658	363.001	350.495	292.307	269.418	386.71	406.468	811.807	201.323	167.265	263.764	204.193	277.931	315.346	219.337	193.078	230.186	225.514	89.2987	169.675	282.568	566.598	84.723	143.721	273.571
		3	281.133	141.085	246.572	210.834	280.064	256.732	266.908	246.572	195.41	261.208	251.748	452.353	236.004	155.089	289.176	229.768	234.845	96.5153	363.192	131.583	329.081	324.735	260.733	224.329	386.412	375.169	798.54	168.969	140.118	235.229	174.52	253.145	297.17	186.913	160.333	194.737	192.316	71.5129	141.121	246.004	542.576	64.9635	116.129	233.672
		4	247.62	127.686	219.698	195.369	254.712	234.043	250.623	225.946	178.065	235.696	241.561	441.9	223.74	138.272	270.827	207.003	224.733	81.539	336.632	119.533	306.955	307.614	240.422	196.992	386.2	354.434	789.258	149.219	123.574	216.876	156.12	236.912	284.914	166.858	140.526	172.949	171.77	61.0864	123.826	222.968	526.152	53.8071	99.8289	208.944
		5	224.403	118.177	200.887	184.159	236.639	217.835	238.678	211.144	165.679	217.637	233.945	433.959	214.668	126.494	257.4	190.91	217.191	71.5424	317.375	110.951	290.822	294.958	225.763	178.104	386.036	339.144	782.132	135.504	112.098	203.632	143.195	225.041	275.756	152.796	126.864	157.742	157.357	54.0578	111.884	206.596	513.756	46.4909	88.7782	191.581
		6	207.058	110.935	186.719	175.479	222.829	205.428	229.342	199.772	156.201	203.913	227.9	427.576	207.529	117.619	246.925	178.694	211.216	64.2914	302.462	104.399	278.272	285.005	214.452	164.024	385.902	327.142	776.358	125.239	103.518	193.414	133.433	215.785	268.492	142.191	116.693	146.315	146.484	48.9198	102.987	194.116	503.844	41.2579	80.6635	178.47
		7	193.443	105.159	175.523	168.46	211.783	195.491	221.735	190.637	148.612	192.987	222.911	422.254	201.679	110.603	238.402	168.977	206.293	58.7372	290.401	99.1615	268.084	276.852	205.332	152.992	385.789	317.326	771.51	117.169	96.7778	185.176	125.7	208.257	262.5	133.801	108.733	137.302	137.879	44.9585	96.0194	184.154	495.614	37.2958	74.3841	168.088
		8	182.376	100.4	166.368	162.607	202.658	187.273	215.349	183.062	142.337	183.997	218.678	417.696	196.745	104.865	231.257	160.989	202.122	54.3153	280.343	94.8377	259.562	269.979	197.746	144.036	385.691	309.062	767.334	110.6	91.2951	178.323	119.365	201.948	257.418	126.935	102.277	129.944	130.834	41.7873	90.3658	175.939	488.593	34.1726	69.3411	159.584
		9	173.14	96.3808	158.691	157.613	194.936	180.311	209.869	176.63	137.022	176.416	215.012	413.717	192.493	100.051	225.133	154.256	198.512	50.6921	271.761	91.1806	252.269	264.058	191.288	136.573	385.605	301.951	763.67	105.112	86.7173	172.49	114.043	196.542	253.017	121.171	96.9021	123.782	124.92	39.1763	85.6559	168.998	482.483	31.6355	65.1775	152.441
		10	165.276	92.9222	152.124	153.277	188.278	174.304	205.085	171.069	132.436	169.899	211.783	410.19	188.768	95.9325	219.792	148.473	195.338	47.6563	264.306	88.0289	245.92	258.872	185.69	130.226	385.527	295.729	760.407	100.434	82.8172	167.434	109.483	191.829	249.144	116.238	92.3337	118.518	119.856	36.9793	81.6511	163.021	477.082	29.5261	61.6653	146.323
		11	158.469	89.9006	146.417	149.456	182.452	169.041	200.852	166.189	128.42	164.211	208.905	407.025	185.46	92.353	215.07	143.428	192.51	45.067	257.74	85.2718	240.314	254.268	180.767	124.738	385.457	290.211	757.467	96.3823	79.4405	162.988	105.515	187.663	245.692	111.948	88.3869	113.95	115.453	35.0981	78.1899	157.796	472.248	27.7393	58.6514	141
		12	152.501	87.2279	141.395	146.052	177.29	164.376	197.064	161.856	124.86	159.186	206.311	404.157	182.49	89.202	210.847	138.973	189.965	42.8262	251.887	82.8302	235.307	250.136	176.386	119.931	385.394	285.263	754.793	92.826	76.4782	159.032	102.019	183.938	242.582	108.17	84.9312	109.933	111.574	33.4645	75.1583	153.173	467.878	26.2027	56.0288	136.309
		13	147.209	84.8395	136.927	142.989	172.671	160.198	193.642	157.969	121.672	154.698	203.954	401.537	179.801	86.3983	207.037	134.996	187.653	40.8634	246.621	80.6459	230.794	246.395	172.451	115.672	385.335	280.786	752.342	89.6705	73.8507	155.478	98.905	180.578	239.755	104.808	81.8718	106.363	108.121	32.0289	72.4735	149.039	463.894	24.8644	53.7199	132.133
		14	142.474	82.6866	132.916	140.21	168.501	156.425	190.527	154.454	118.793	150.656	201.795	399.126	177.346	83.8811	203.57	131.416	185.537	39.1264	241.843	78.675	226.693	242.981	168.885	111.864	385.281	276.704	750.079	86.8447	71.4986	152.258	96.1068	177.521	237.168	101.788	79.1375	103.161	105.02	30.7547	70.0733	145.312	460.235	23.6863	51.6672	128.38
		15	138.202	80.7314	129.288	137.672	164.71	152.992	187.672	151.252	116.175	146.989	199.806	396.894	175.091	81.6037	200.394	128.168	183.589	37.5758	237.478	76.8835	222.94	239.845	165.632	108.431	385.23	272.957	747.979	84.294	69.3763	149.321	93.5729	174.722	234.784	99.0545	76.6741	100.266	102.212	29.614	67.9103	141.926	456.855	22.6398	49.8266	124.982
		16	134.322	78.9443	125.984	135.339	161.241	149.849	185.04	148.317	113.777	143.638	197.963	394.818	173.007	79.5292	197.469	125.203	181.785	36.1809	233.467	75.2445	219.486	236.949	162.646	105.316	385.183	269.497	746.02	81.9759	67.448	146.624	91.2631	172.143	232.576	96.5642	74.4392	97.6327	99.6542	28.5854	65.9473	138.83	453.715	21.7028	48.1643	121.885
		17	130.777	77.3016	122.957	133.183	158.049	146.956	182.601	145.611	111.57	140.561	196.248	392.878	171.072	77.6287	194.759	122.48	180.107	34.9178	229.76	73.7368	216.29	234.259	159.89	102.471	385.138	266.288	744.184	79.8564	65.6855	144.135	89.1453	169.756	230.521	94.2819	72.3992	95.2216	97.3095	27.6517	64.1552	135.983	450.786	20.8579	46.6534	119.045
		18	127.52	75.7841	120.17	131.183	155.098	144.279	180.331	143.106	109.529	137.72	194.644	391.057	169.268	75.8784	192.239	119.967	178.539	33.7674	226.319	72.343	213.32	231.752	157.334	99.8594	385.096	263.297	742.457	77.9084	64.066	141.828	87.1937	167.535	228.6	92.1796	70.5271	93.003	95.1494	26.7993	62.5101	133.352	448.041	20.0915	45.2723	116.429
		19	124.514	74.3762	117.592	129.318	152.356	141.792	178.21	140.776	107.632	135.085	193.139	389.343	167.579	74.2591	189.885	117.638	177.068	32.7141	223.112	71.0488	210.547	229.405	154.954	97.4501	385.057	260.498	740.828	76.1094	62.5708	139.679	85.3869	165.461	226.798	90.2341	68.8008	90.952	93.1503	26.0172	60.9929	130.911	445.46	19.3925	44.0035	114.007
		20	121.728	73.0647	115.197	127.573	149.8	139.472	176.221	138.6	105.863	132.632	191.721	387.723	165.992	72.7549	187.679	115.469	175.684	31.7452	220.112	69.8424	207.95	227.2	152.729	95.2182	385.019	257.871	739.285	74.4412	61.1847	137.67	83.7075	163.518	225.101	88.4265	67.2021	89.048	91.2925	25.2964	59.5875	128.636	443.026	18.7518	42.8327	111.756
		50	81.2479	53.1719	79.7648	100.088	110.729	103.871	144.202	104.937	78.7355	95.6067	168.087	359.901	140.046	50.477	152.312	82.8205	152.704	18.5538	172.821	51.4348	166.601	191.2	117.961	62.9459	384.348	215.16	712.261	50.1039	41.0051	106.285	58.7018	132.401	196.84	61.6003	44.1557	61.0228	63.7014	15.3134	39.2923	94.0506	401.708	10.2899	26.4582	78.2622
		100	59.8401	41.809	60.4027	83.3035	88.1	83.1142	123.906	85.02	62.9374	74.6359	152.165	340.188	123.149	38.2816	130.058	64.4106	137.34	12.3592	143.923	40.8086	140.879	167.807	97.0223	46.0246	383.841	187.616	692.476	37.1366	30.2942	87.3913	44.8817	112.861	177.845	46.8617	32.1373	45.8491	48.5203	10.4754	28.6748	74.2132	373.032	6.53503	18.3778	59.7739
		500	29.4168	23.9239	31.6717	54.396	51.813	49.5296	87.1223	52.153	37.4174	41.9996	120.769	298.481	91.3637	20.1427	90.1283	35.9292	107.365	4.81173	94.1064	23.8442	95.4401	123.941	61.634	22.2465	382.667	136.502	648.631	18.5265	14.9995	55.4749	24.0644	77.8968	140.509	24.8344	15.3686	23.6068	25.7876	4.33795	13.7989	42.8154	314.097	2.27747	7.88522	31.9707
		1000	21.6659	18.8114	23.9837	45.2742	41.2242	39.6318	74.8603	42.2544	29.9097	32.7872	109.329	282.133	80.3403	15.2761	76.9599	27.9426	96.5623	3.20522	78.3708	18.9181	80.7044	108.777	50.6938	16.2661	382.163	119.027	630.614	13.7317	11.0815	45.6135	18.3989	66.4004	126.949	18.8924	11.1856	17.7368	19.642	2.96745	10.0702	33.7847	291.676	1.44641	5.47707	24.4181
0.35	0.65	1	335.375	151.731	281.477	207.202	295.618	268.561	249.392	252.887	204.743	284.145	216.559	363.377	212.584	176.624	272.893	251.446	204.119	135.008	356.608	139.51	315.39	293.403	261.102	270.714	284.489	342.47	613.471	199.557	166.337	235.681	196.214	239.547	256.429	211.828	194.903	225.085	217.523	95.9074	170.817	263.094	448.276	98.0099	152.017	263.158
		2	247.009	119.306	213.151	172.456	235.203	214.893	214.291	204.889	163.662	221.819	196.045	343.474	186.935	133.951	233.021	195.552	183.581	89.9322	296.979	110.688	266.694	257.507	214.756	197.94	284.114	298.629	596.43	147.91	122.888	193.786	150.019	204.194	231.683	161.146	141.854	169.116	165.684	65.6072	124.659	207.601	416.276	62.2455	105.591	200.991
		3	206.546	103.654	181.155	154.899	205.762	188.619	196.096	181.155	143.566	191.908	184.958	332.341	173.391	113.943	212.456	168.809	172.539	70.9092	266.835	96.6735	241.774	238.581	191.559	164.813	283.894	275.634	586.682	124.141	102.944	172.821	128.219	185.984	218.329	137.324	117.795	143.072	141.293	52.5401	103.68	180.738	398.627	47.7283	85.3196	171.677
		4	181.925	93.8104	161.411	143.536	187.136	171.95	184.131	166.001	130.823	173.164	177.474	324.661	164.381	101.588	198.975	152.084	165.11	59.9062	247.321	87.82	225.518	226.002	176.636	144.729	283.739	260.401	579.863	109.63	90.7887	159.338	114.7	174.058	209.324	122.589	103.244	127.064	126.198	44.8798	90.9739	163.813	386.561	39.5317	73.3437	153.51
		5	164.867	86.8236	147.59	135.3	173.857	160.042	175.355	155.126	121.723	159.896	171.878	318.827	157.715	92.9343	189.11	140.26	159.569	52.5618	233.174	81.515	213.665	216.704	165.867	130.852	283.619	249.167	574.628	99.5537	82.3579	149.607	105.204	165.337	202.596	112.258	93.206	115.892	115.609	39.716	82.2006	151.785	377.453	34.1565	65.2248	140.753
		6	152.124	81.5031	137.181	128.923	163.711	150.927	168.496	146.771	114.76	149.814	167.437	314.138	152.471	86.4141	181.414	131.285	155.179	47.2345	222.217	76.701	204.445	209.392	157.557	120.507	283.52	240.349	570.386	92.012	76.054	142.1	98.0323	158.536	197.26	104.467	85.7336	107.497	107.621	35.941	75.6642	142.616	370.171	30.3119	59.263	131.121
		7	142.122	77.2598	128.956	123.766	155.595	143.626	162.907	140.06	109.184	141.787	163.772	310.227	148.173	81.2596	175.152	124.147	151.562	43.1539	213.356	72.8533	196.96	203.402	150.856	112.402	283.437	233.137	566.824	86.0832	71.1021	136.047	92.3512	153.005	192.857	98.3031	79.8852	100.875	101.299	33.0307	70.5449	135.297	364.124	27.401	54.6495	123.493
		8	133.99	73.7631	122.23	119.466	148.891	137.588	158.215	134.494	104.574	135.182	160.662	306.879	144.547	77.0437	169.903	118.278	148.498	39.9052	205.966	69.6767	190.698	198.352	145.283	105.823	283.365	227.066	563.756	81.2571	67.0739	131.013	87.6967	148.37	189.124	93.2584	75.1425	95.4691	96.1231	30.7009	66.3912	129.261	358.966	25.1064	50.9445	117.245
		9	127.205	70.8104	116.589	115.798	143.218	132.474	154.189	129.769	100.669	129.612	157.968	303.955	141.424	73.507	165.404	113.331	145.846	37.2432	199.661	66.9898	185.341	194.002	140.538	100.34	283.301	221.841	561.064	77.2252	63.7107	126.727	83.7863	144.398	185.89	89.0239	71.1934	90.9421	91.7779	28.7826	62.9308	124.162	354.477	23.2424	47.8855	111.997
		10	121.427	68.2694	111.764	112.611	138.327	128.06	150.675	125.683	97.2999	124.824	155.596	301.364	138.686	70.481	161.48	109.082	143.514	35.0128	194.184	64.6743	180.676	190.191	136.425	95.6761	283.245	217.27	558.666	73.7885	60.8453	123.013	80.4364	140.935	183.045	85.3992	67.837	87.0747	88.0578	27.1684	59.9886	119.77	350.509	21.6926	45.3051	107.502
		11	116.427	66.0494	107.572	109.805	134.046	124.194	147.565	122.098	94.3493	120.645	153.481	299.039	136.256	67.8512	158.01	105.376	141.436	33.1105	189.36	62.6486	176.557	186.809	132.808	91.6444	283.193	213.216	556.506	70.8115	58.3645	119.746	77.5215	137.875	180.508	82.2476	64.9373	83.7181	84.8225	25.7864	57.4456	115.932	346.958	20.3799	43.0909	103.591
		12	112.042	64.0858	103.882	107.304	130.254	120.766	144.781	118.914	91.7337	116.953	151.576	296.932	134.074	65.5361	154.908	102.102	139.566	31.4642	185.06	60.8548	172.879	183.774	129.59	88.1124	283.146	209.581	554.542	68.1987	56.188	116.84	74.9527	135.138	178.223	79.4721	62.3985	80.7669	81.9729	24.5861	55.2184	112.535	343.747	19.2509	41.164	100.146
		13	108.154	62.3311	100.599	105.053	126.86	117.697	142.267	116.059	89.3918	113.656	149.844	295.007	132.098	63.4763	152.108	99.1808	137.867	30.0221	181.191	59.2501	169.563	181.025	126.699	84.9835	283.103	206.292	552.741	65.8803	54.2577	114.229	72.6649	132.669	176.147	77.0016	60.1507	78.144	79.4361	23.5314	53.2458	109.498	340.82	18.2677	39.4677	97.077
		14	104.675	60.7493	97.6529	103.012	123.797	114.925	139.979	113.476	87.2768	110.686	148.258	293.235	130.295	61.627	149.561	96.5505	136.313	28.746	177.681	57.8021	166.55	178.517	124.079	82.1857	283.063	203.293	551.079	63.8042	52.5296	111.863	70.6091	130.424	174.246	74.7829	58.1418	75.7915	77.1574	22.5953	51.4824	106.76	338.132	17.4022	37.9595	94.3198
		15	101.536	59.3128	94.9873	101.147	121.012	112.403	137.881	111.124	85.3528	107.992	146.796	291.596	128.638	59.9537	147.228	94.1645	134.882	27.6067	174.474	56.4858	163.793	176.213	121.689	79.664	283.026	200.54	549.536	61.9303	50.9703	109.705	68.7474	128.367	172.495	72.7747	56.332	73.6652	75.0948	21.7573	49.8932	104.272	335.648	16.6333	36.6073	91.8234
		16	98.6857	57.9999	92.5597	99.4326	118.463	110.093	135.947	108.967	83.5914	105.53	145.442	290.07	127.107	58.4297	145.079	91.986	133.556	26.5819	171.527	55.2817	161.255	174.085	119.495	77.3751	282.991	197.998	548.096	60.2272	49.5536	107.724	67.0504	126.473	170.872	70.9451	54.69	71.7301	73.2153	21.0015	48.4511	101.997	333.342	15.9449	35.386	89.548
		17	96.081	56.793	90.3359	97.849	116.118	107.967	134.156	106.98	81.97	103.269	144.182	288.645	125.686	57.0333	143.089	89.9855	132.323	25.6539	168.803	54.174	158.907	172.109	117.47	75.2849	282.959	195.64	546.747	58.67	48.2587	105.895	65.4945	124.719	169.362	69.2684	53.1912	69.9588	71.4927	20.3155	47.1344	99.9057	331.19	15.3242	34.276	87.4619
		18	93.6882	55.6781	88.2882	96.3791	113.949	106.001	132.488	105.139	80.4701	101.182	143.004	287.307	124.36	55.7474	141.237	88.1392	131.171	24.8087	166.275	53.1499	156.725	170.267	115.592	73.3661	282.928	193.443	545.479	57.2388	47.0689	104.2	64.0607	123.087	167.951	67.7238	51.8158	68.3288	69.9057	19.6893	45.9258	97.973	329.173	14.7611	33.2613	85.5397
		19	91.4797	54.6437	86.394	95.009	111.935	104.173	130.93	103.427	79.0766	99.2463	141.898	286.048	123.119	54.5577	139.507	86.4277	130.091	24.0348	163.919	52.1991	154.688	168.542	113.844	71.596	282.899	191.387	544.281	55.9171	45.9704	102.621	62.7332	121.563	166.627	66.2945	50.5475	66.8219	68.4369	19.1147	44.8111	96.1793	327.277	14.2476	32.3291	83.7603
		20	89.4326	53.6802	84.6345	93.7272	110.057	102.469	129.468	101.829	77.7769	97.4443	140.857	284.858	121.953	53.4526	137.886	84.8347	129.074	23.323	161.715	51.3128	152.78	166.923	112.209	69.9562	282.871	189.456	543.148	54.6915	44.952	101.145	61.4994	120.135	165.38	64.9664	49.373	65.423	67.0721	18.5851	43.7786	94.508	325.488	13.7769	31.4689	82.1064
		50	59.6923	39.0651	58.6027	73.5337	81.3522	76.3136	105.944	77.0966	57.8465	70.2417	123.493	264.417	102.891	37.0851	111.903	60.8477	112.191	13.6314	126.97	37.7889	122.401	140.473	86.6649	46.246	282.378	158.076	523.294	36.811	30.1262	78.0869	43.1278	97.2741	144.617	45.2574	32.4409	44.833	46.801	11.2507	28.8678	69.0984	295.132	7.5599	19.4387	57.4987
		100	43.9642	30.7168	44.3775	61.2026	64.7265	61.0635	91.0331	62.4637	46.2397	54.8345	111.794	249.934	90.4767	28.1252	95.553	47.3221	100.903	9.08021	105.74	29.9818	103.503	123.287	71.2817	33.814	282.006	137.84	508.758	27.2841	22.257	64.2058	32.9743	82.918	130.661	34.429	23.6111	33.685	35.6475	7.69622	21.0672	54.524	274.065	4.80125	13.5021	43.9155
		500	21.6124	17.5768	23.269	39.9644	38.0667	36.3891	64.0082	38.3165	27.4903	30.8568	88.7286	219.292	67.1244	14.7987	66.2167	26.397	78.8803	3.53515	69.1394	17.5182	70.1192	91.0584	45.2821	16.3443	281.143	100.287	476.545	13.6113	11.02	40.7571	17.68	57.2303	103.231	18.2457	11.2912	17.3438	18.946	3.18706	10.138	31.4562	230.765	1.67324	5.79322	23.4887
		1000	15.9178	13.8206	17.6207	33.2627	30.2872	29.1173	54.9994	31.044	21.9744	24.0885	80.3234	207.281	59.0255	11.2233	56.5419	20.5293	70.9437	2.35486	57.5785	13.899	59.293	79.9179	37.2444	11.9506	280.773	87.4487	463.308	10.0886	8.1415	33.5119	13.5176	48.784	93.2689	13.8802	8.21797	13.0311	14.4308	2.18017	7.39852	24.8214	214.293	1.06267	4.02397	17.9398
0.4	0.6	1	256.772	116.169	215.506	158.639	226.332	205.617	190.941	193.617	156.757	217.549	165.803	278.21	162.76	135.227	208.933	192.513	156.278	103.365	273.028	106.812	241.47	224.637	199.906	207.265	217.812	262.204	469.688	152.786	127.352	180.443	150.226	183.403	196.328	162.181	149.222	172.331	166.541	73.4291	130.782	201.431	343.211	75.0388	116.388	201.481
		2	189.116	91.3439	163.194	132.037	180.078	164.528	164.067	156.868	125.304	169.831	150.097	262.972	143.122	102.556	178.407	149.72	140.554	68.8543	227.375	84.7453	204.188	197.153	164.423	151.548	217.524	228.638	456.642	113.244	94.0863	148.367	114.859	156.336	177.382	123.377	108.607	129.48	126.852	50.2305	95.442	158.945	318.711	47.6567	80.8433	153.884
		3	158.137	79.3601	138.697	118.594	157.536	144.412	150.136	138.696	109.918	146.929	141.608	254.448	132.752	87.2378	162.661	129.245	132.1	54.2898	204.295	74.0156	185.108	182.663	146.662	126.185	217.357	211.032	449.179	95.0451	78.8164	132.316	98.1674	142.394	167.158	105.138	90.1872	109.54	108.178	40.226	79.3803	138.377	305.199	36.5419	65.3228	131.44
		4	139.286	71.8236	123.58	109.895	143.276	131.649	140.975	127.095	100.162	132.579	135.878	248.569	125.854	77.7781	152.34	116.439	126.412	45.8657	189.355	67.2372	172.662	173.033	135.237	110.808	217.238	199.369	443.957	83.9356	69.5101	121.993	87.8176	133.263	160.264	93.8575	79.0458	97.2838	96.6206	34.3611	69.6519	125.42	295.96	30.2665	56.1537	117.531
		5	126.227	66.4744	112.999	103.589	133.11	122.532	134.256	118.768	93.1945	122.421	131.594	244.102	120.751	71.1529	144.788	107.387	122.17	40.2426	178.523	62.41	163.587	165.914	126.992	100.184	217.145	190.768	439.949	76.2208	63.0553	114.543	80.5472	126.586	155.113	85.9479	71.3609	88.7298	88.5135	30.4075	62.9349	116.211	288.988	26.1511	49.9377	107.764
		6	116.47	62.4008	105.029	98.7067	125.341	115.553	129.005	112.372	87.8632	114.701	128.194	240.512	116.735	66.1608	138.895	100.515	118.809	36.1639	170.135	58.7242	156.528	160.315	120.629	92.2635	217.07	184.017	436.702	70.4467	58.2289	108.795	75.056	121.379	151.027	79.9827	65.6398	82.302	82.3971	27.5174	57.9304	109.19	283.412	23.2076	45.3732	100.39
		7	108.812	59.152	98.7316	94.7586	119.128	109.964	124.726	107.233	83.5943	108.555	125.388	237.518	113.445	62.2144	134.101	95.0498	116.04	33.0397	163.351	55.7783	150.797	155.73	115.499	86.0577	217.006	178.496	433.974	65.9074	54.4375	104.161	70.7064	117.144	147.656	75.2633	61.1621	77.2321	77.5567	25.2891	54.0109	103.587	278.783	20.9789	41.841	94.5496
		8	102.586	56.4749	93.5822	91.4664	113.995	105.341	121.134	102.972	80.0645	103.498	123.007	234.954	110.669	58.9866	130.082	90.5562	113.693	30.5524	157.693	53.3462	146.003	151.863	111.232	81.0204	216.951	173.847	431.626	62.2125	51.3535	100.307	67.1428	113.596	144.798	71.4009	57.531	73.0935	73.5943	23.5054	50.8307	98.9658	274.834	19.2221	39.0044	89.7661
		9	97.3913	54.2142	89.2635	88.6575	109.651	101.425	118.051	99.3545	77.0748	99.2339	120.944	232.716	108.277	56.2788	126.637	86.7692	111.663	28.5143	152.865	51.2891	141.901	148.533	107.599	76.8225	216.903	169.847	429.564	59.1256	48.7785	97.0257	64.1489	110.555	142.322	68.1589	54.5074	69.6275	70.2675	22.0367	48.1814	95.0612	271.397	17.795	36.6623	85.748
		10	92.9675	52.2687	85.5695	86.2181	105.906	98.0457	115.36	96.2262	74.4952	95.5682	119.128	230.732	106.182	53.9621	123.633	83.5161	109.878	26.8067	148.672	49.5163	138.33	145.615	104.45	73.252	216.859	166.347	427.729	56.4943	46.5847	94.1815	61.5841	107.904	140.144	65.3838	51.9377	66.6666	67.4192	20.8008	45.9287	91.6991	268.358	16.6084	34.6867	82.3064
		11	89.1391	50.5691	82.3597	84.0692	102.629	95.0858	112.979	93.4813	72.2361	92.369	117.509	228.952	104.321	51.9486	120.977	80.6784	108.287	25.3502	144.979	47.9654	135.176	143.026	101.681	70.1653	216.82	163.243	426.075	54.215	44.6853	91.6806	59.3524	105.56	138.202	62.9708	49.7176	64.0967	64.9422	19.7427	43.9818	88.7603	265.639	15.6033	32.9914	79.3122
		12	85.7818	49.0657	79.5346	82.1543	99.7256	92.4616	110.848	91.0438	70.2336	89.5419	116.05	227.338	102.651	50.1761	118.602	78.1721	106.855	24.0898	141.686	46.592	132.36	140.702	99.2174	67.461	216.784	160.46	424.571	52.2146	43.019	89.4555	57.3857	103.465	136.452	60.8458	47.7738	61.8371	62.7605	18.8238	42.2766	86.1596	263.181	14.739	31.5162	76.674
		13	82.8052	47.7222	77.0214	80.4313	97.1273	90.1116	108.923	88.8576	68.4406	87.0177	114.724	225.864	101.138	48.599	116.458	75.9353	105.555	22.9857	138.724	45.3633	129.822	138.597	97.0036	65.0655	216.751	157.942	423.192	50.4396	41.541	87.4563	55.6341	101.575	134.862	58.9544	46.0529	59.829	60.8182	18.0162	40.7663	83.8346	260.94	13.9862	30.2175	74.3246
		14	80.1415	46.5112	74.7655	78.8682	94.782	87.9892	107.171	86.8804	66.8213	84.7442	113.51	224.508	99.7571	47.1831	114.508	73.9215	104.365	22.0086	136.037	44.2547	127.515	136.677	94.998	62.9235	216.72	155.646	421.92	48.8501	40.218	85.6452	54.0601	99.8556	133.407	57.2556	44.5148	58.0279	59.0736	17.2995	39.4162	81.738	258.882	13.3236	29.0628	72.2136
		15	77.7386	45.4114	72.7246	77.4403	92.6496	86.0582	105.565	85.0792	65.3482	82.681	112.391	223.253	98.4885	45.9021	112.722	72.0947	103.269	21.1364	133.582	43.2469	125.404	134.913	93.1681	60.9927	216.692	153.538	420.738	47.4154	39.0241	83.9928	52.6347	98.281	132.066	55.7182	43.1292	56.3999	57.4945	16.6579	38.1995	79.8332	256.981	12.7349	28.0275	70.3023
		16	75.5562	44.4061	70.866	76.1281	90.6982	84.2902	104.085	83.4281	63.9997	80.7966	111.354	222.085	97.3165	44.7352	111.076	70.4268	102.254	20.3518	131.325	42.325	123.461	133.284	91.4883	59.2403	216.665	151.592	419.636	46.1114	37.9395	82.476	51.3355	96.8306	130.824	54.3174	41.872	54.9184	56.0555	16.0793	37.0954	78.0917	255.215	12.2078	27.0924	68.5602
		17	73.562	43.4821	69.1634	74.9157	88.9027	82.6626	102.713	81.9064	62.7583	79.0655	110.389	220.994	96.2282	43.6661	109.552	68.8951	101.31	19.6413	129.24	41.477	121.663	131.771	89.938	57.64	216.64	149.787	418.603	44.9192	36.9481	81.0761	50.1442	95.4877	129.668	53.0336	40.7245	53.5622	54.7366	15.5541	36.0873	76.4903	253.567	11.7326	26.2425	66.963
		18	71.73	42.6286	67.5957	73.7903	87.2424	81.1568	101.436	80.4971	61.6099	77.4674	109.487	219.97	95.2133	42.6816	108.135	67.4816	100.428	18.9942	127.305	40.6929	119.992	130.36	88.5003	56.1709	216.617	148.104	417.632	43.8235	36.0371	79.778	49.0464	94.2386	128.587	51.851	39.6715	52.3142	53.5215	15.0746	35.162	75.0106	252.023	11.3015	25.4657	65.4913
		19	70.0391	41.8366	66.1454	72.7413	85.7004	79.7577	100.243	79.1863	60.543	75.9855	108.64	219.005	94.2632	41.7708	106.81	66.1712	99.6008	18.4017	125.501	39.9649	118.433	129.04	87.1616	54.8157	216.594	146.53	416.716	42.8115	35.1961	78.5693	48.0301	93.0721	127.574	50.7567	38.7004	51.1605	52.397	14.6347	34.3085	73.6373	250.571	10.9083	24.752	64.129
		20	68.4718	41.0989	64.7983	71.7599	84.2627	78.4527	99.1241	77.9625	59.5479	74.6058	107.843	218.094	93.3705	40.9246	105.569	64.9515	98.8223	17.8567	123.813	39.2863	116.972	127.8	85.9103	53.5602	216.573	145.053	415.848	41.8732	34.4164	77.4395	47.0854	91.9787	126.619	49.7399	37.8012	50.0895	51.3521	14.2292	33.518	72.3577	249.202	10.5479	24.0934	62.8627
		50	45.7019	29.9092	44.8677	56.2992	62.2853	58.4276	81.1135	59.0271	44.2887	53.7788	94.5492	202.444	78.7759	28.3933	85.6756	46.5866	85.8962	10.4365	97.2117	28.9321	93.7133	107.55	66.3528	35.4071	216.196	121.027	400.647	28.1834	23.0654	59.7853	33.0198	74.4755	110.723	34.6502	24.8376	34.3253	35.8321	8.61378	22.1019	52.9034	225.961	5.78805	14.8827	44.0225
		100	33.6601	23.5176	33.9765	46.8582	49.5563	46.7517	69.6972	47.8238	35.4023	41.9827	85.5926	191.356	69.2713	21.5334	73.1578	36.231	77.2538	6.95204	80.9568	22.9548	79.2443	94.3916	54.575	25.8889	215.911	105.534	389.518	20.8894	17.0405	49.1576	25.246	63.4841	100.038	26.3597	18.0772	25.7901	27.2927	5.89242	16.1296	41.7449	209.831	3.67596	10.3375	33.6228
		500	16.547	13.4572	17.8153	30.5978	29.1448	27.8604	49.0063	29.3361	21.0473	23.6248	67.9328	167.896	51.3921	11.3303	50.6972	20.2102	60.3927	2.7066	52.9348	13.4124	53.6851	69.7166	34.6691	12.5136	215.25	76.7821	364.855	10.4211	8.43721	31.2046	13.5362	43.8169	79.0364	13.9693	8.64486	13.2788	14.5055	2.44009	7.76189	24.0837	176.68	1.28108	4.43544	17.9835
		1000	12.1871	10.5814	13.4908	25.4667	23.1886	22.2929	42.1089	23.7681	16.8242	18.4428	61.4976	158.7	45.1914	8.59282	43.2899	15.7177	54.3163	1.80294	44.0836	10.6414	45.3962	61.1871	28.5153	9.14969	214.967	66.9529	354.72	7.72407	6.23334	25.6576	10.3494	37.3502	71.409	10.627	6.29188	9.97696	11.0486	1.66919	5.66449	19.0039	164.068	0.813603	3.08085	13.7352
0.45	0.55	1	202.881	91.7881	170.276	125.345	178.83	162.463	150.867	152.981	123.857	171.89	131.005	219.821	128.6	106.846	165.083	152.109	123.479	81.6712	215.726	84.395	190.791	177.491	157.951	163.765	172.098	207.173	371.112	120.72	100.624	142.573	118.697	144.911	155.124	128.143	117.904	136.163	131.588	58.018	103.334	159.155	271.179	59.2899	91.9611	159.195
		2	149.425	72.1729	128.943	104.325	142.283	129.997	129.633	123.945	99.0054	134.187	118.595	207.781	113.084	81.0319	140.963	118.297	111.055	54.4034	179.654	66.9593	161.334	155.776	129.914	119.741	171.871	180.652	360.803	89.4767	74.3398	117.228	90.7524	123.525	140.154	97.4831	85.8127	102.305	100.228	39.6883	75.411	125.586	251.821	37.6547	63.8762	121.587
		3	124.948	62.7043	109.588	93.704	124.473	114.103	118.626	109.587	86.8489	116.092	111.888	201.046	104.891	68.9286	128.523	102.119	104.376	42.8957	161.418	58.4815	146.258	144.327	115.881	99.7017	171.739	166.742	354.907	75.0973	62.2747	104.546	77.5644	112.509	132.076	83.0723	71.259	86.55	85.4738	31.7835	62.7203	109.335	241.145	28.8726	51.6131	103.854
		4	110.053	56.7495	97.6435	86.8306	113.206	104.019	111.388	100.421	79.1401	104.754	107.361	196.4	99.4401	61.4543	120.368	92.0013	99.8815	36.2396	149.614	53.1257	136.424	136.717	106.854	87.5521	171.645	157.526	350.781	66.3195	54.9216	96.3894	69.3867	105.294	126.628	74.159	62.456	76.8662	76.3422	27.1495	55.0336	99.097	233.845	23.9143	44.3684	92.864
		5	99.7345	52.5229	89.283	81.8484	105.173	96.8153	106.079	93.8418	73.6352	96.7273	103.975	192.871	95.4081	56.2195	114.4	84.8488	96.5292	31.7966	141.056	49.3116	129.254	131.093	100.339	79.1575	171.572	150.731	347.614	60.2238	49.8215	90.5032	63.6422	100.018	122.558	67.9094	56.3839	70.1075	69.9366	24.0257	49.7263	91.8206	228.336	20.6626	39.457	85.1469
		6	92.0258	49.3043	82.9863	77.9905	99.0349	91.3013	101.93	88.7877	69.4228	90.628	101.289	190.034	92.2353	52.2752	109.744	79.4195	93.8739	28.574	134.428	46.3994	123.676	126.669	95.3121	72.8996	171.512	145.396	345.048	55.6616	46.008	85.9618	59.3035	95.9044	119.33	63.1962	51.8636	65.0288	65.1039	21.7421	45.7722	86.2739	223.931	18.3368	35.8504	79.3201
		7	85.9749	46.7374	78.0102	74.871	94.1256	86.885	98.5487	84.7275	66.0498	85.7721	99.0718	187.668	89.6352	49.157	105.956	75.1011	91.6859	26.1054	129.067	44.0718	119.149	123.046	91.2588	67.9962	171.462	141.034	342.893	52.075	43.0124	82.3003	55.8667	92.5585	116.667	59.4673	48.3256	61.0229	61.2794	19.9815	42.6753	81.8464	220.273	16.5759	33.0596	74.7058
		8	81.0559	44.6221	73.9415	72.2697	90.0701	83.2325	95.7106	81.3608	63.2608	81.7765	97.1904	185.643	87.4423	46.6067	102.781	71.5506	89.8319	24.1402	124.597	42.1501	115.361	119.991	87.8872	64.0161	171.418	137.361	341.037	49.1555	40.5756	79.2548	53.0511	89.7545	114.408	56.4155	45.4566	57.7529	58.1485	18.5721	40.1626	78.1952	217.152	15.1878	30.8183	70.9263
		9	76.9512	42.8359	70.5292	70.0504	86.6382	80.1384	93.2751	78.5024	60.8986	78.407	95.5607	183.874	85.5525	44.4672	100.059	68.5584	88.2276	22.5298	120.783	40.5247	112.12	117.359	85.0169	60.6993	171.38	134.2	339.409	46.7165	38.541	76.6622	50.6856	87.3519	112.452	53.854	43.0676	55.0143	55.52	17.4117	38.0693	75.11	214.437	14.0602	28.9678	67.7515
		10	73.4558	41.2988	67.6104	68.1229	83.6792	77.4682	91.149	76.0306	58.8604	75.5107	94.126	182.307	83.8967	42.6367	97.6853	65.988	86.8169	21.1806	117.47	39.124	109.298	115.054	82.5288	57.8781	171.345	131.435	337.959	44.6375	36.8077	74.415	48.659	85.2572	110.731	51.6613	41.0372	52.6748	53.2695	16.4352	36.2894	72.4536	212.036	13.1227	27.4068	65.0322
		11	70.4309	39.9558	65.0743	66.4251	81.0896	75.1295	89.2675	73.8617	57.0755	72.9829	92.8467	180.9	82.4265	41.0458	95.5866	63.7459	85.5602	20.0298	114.551	37.8986	106.806	113.008	80.3408	55.4392	171.314	128.982	336.652	42.8366	35.3069	72.439	46.8957	83.4056	109.196	49.7547	39.2831	50.6443	51.3124	15.5992	34.7511	70.1316	209.888	12.3286	26.0673	62.6665
		12	67.7782	38.768	62.8422	64.912	78.7955	73.0561	87.5838	71.9358	55.4932	70.7492	91.694	179.625	81.1068	39.6453	93.71	61.7656	84.4287	19.0339	111.95	36.8134	104.581	111.172	78.394	53.3025	171.286	126.784	335.464	41.256	33.9903	70.6809	45.3418	81.7504	107.814	48.0757	37.7472	48.859	49.5885	14.8731	33.4037	68.0767	207.946	11.6456	24.9017	60.5819
		13	65.4263	37.7065	60.8564	63.5506	76.7425	71.1993	86.063	70.2085	54.0765	68.7548	90.6462	178.461	79.9114	38.3992	92.0162	59.9983	83.4012	18.1615	109.609	35.8426	102.575	109.509	76.6448	51.4098	171.26	124.794	334.374	39.8535	32.8225	69.1013	43.9578	80.2568	106.558	46.5812	36.3875	47.2723	48.0539	14.2351	32.2104	66.2397	206.175	11.0508	23.8755	58.7256
		14	63.3216	36.7496	59.074	62.3156	74.8895	69.5223	84.6785	68.6462	52.7971	66.9584	89.6868	177.389	78.8204	37.2805	90.4754	58.4071	82.4609	17.3895	107.486	34.9667	100.752	107.992	75.0601	49.7173	171.236	122.979	333.369	38.5976	31.7772	67.6703	42.7141	78.8983	105.408	45.239	35.1722	45.8492	46.6755	13.6687	31.1437	64.5831	204.549	10.5273	22.9632	57.0577
		15	61.4231	35.8806	57.4614	61.1874	73.2046	67.9966	83.4096	67.2231	51.6332	65.3282	88.8028	176.397	77.8181	36.2683	89.0641	56.9637	81.5951	16.7003	105.546	34.1704	99.0845	106.598	73.6143	48.1918	171.213	121.314	332.435	37.464	30.8339	66.3647	41.5879	77.6542	104.349	44.0242	34.0774	44.5629	45.4277	13.1618	30.1823	63.0781	203.047	10.0621	22.1452	55.5475
		16	59.6987	35.0863	55.9929	60.1506	71.6628	66.5997	82.2398	65.9185	50.5677	63.8393	87.9837	175.475	76.892	35.3463	87.7638	55.6458	80.7934	16.0804	103.763	33.442	97.5493	105.31	72.2871	46.8071	171.192	119.777	331.564	36.4337	29.9769	65.1662	40.5614	76.5082	103.367	42.9174	33.0841	43.3923	44.2907	12.7046	29.3099	61.702	201.651	9.64569	21.4064	54.171
		17	58.1231	34.3563	54.6477	59.1926	70.2441	65.3137	81.1559	64.7162	49.5868	62.4715	87.2212	174.612	76.0322	34.5016	86.5597	54.4357	80.0475	15.519	102.116	32.7719	96.1289	104.115	71.0621	45.5427	171.173	118.35	330.748	35.4917	29.1936	64.0601	39.6201	75.4471	102.454	41.9031	32.1774	42.3207	43.2487	12.2896	28.5134	60.4368	200.349	9.27019	20.7348	52.9091
		18	56.6756	33.6818	53.4089	58.3034	68.9322	64.1239	80.1471	63.6026	48.6794	61.2088	86.5083	173.803	75.2303	33.7237	85.4396	53.3188	79.3506	15.0077	100.586	32.1524	94.8087	103.001	69.9262	44.3819	171.154	117.021	329.981	34.6259	28.4738	63.0345	38.7527	74.4601	101.6	40.9687	31.3454	41.3347	42.2886	11.9108	27.7823	59.2676	199.129	8.92957	20.121	51.7462
		19	55.3396	33.0561	52.263	57.4746	67.7139	63.0185	79.2044	62.567	47.8364	60.0379	85.8394	173.041	74.4795	33.0041	84.3934	52.2834	78.6969	14.5396	99.161	31.5772	93.5765	101.958	68.8684	43.3111	171.136	115.777	329.257	33.8264	27.8093	62.0794	37.9497	73.5384	100.799	40.1041	30.5781	40.4231	41.4001	11.5632	27.108	58.1825	197.982	8.61889	19.5571	50.6698
		20	54.1012	32.4732	51.1987	56.6992	66.578	61.9873	78.3203	61.6	47.0502	58.9478	85.2095	172.321	73.7743	32.3355	83.4127	51.3197	78.0818	14.109	97.8274	31.0411	92.4224	100.978	67.8797	42.3192	171.12	114.609	328.571	33.085	27.1932	61.1867	37.2033	72.6746	100.045	39.3006	29.8676	39.5769	40.5745	11.2428	26.4834	57.1715	196.9	8.33415	19.0368	49.6693
		50	36.1102	23.6319	35.451	44.4833	49.2131	46.165	64.0897	46.6387	34.9936	42.4919	74.7055	159.956	62.2427	22.4342	67.6943	36.8091	67.8686	8.24613	76.8092	22.8599	74.0451	84.9776	52.4269	27.976	170.821	95.6265	316.56	22.2684	18.2245	47.2377	26.0897	58.8448	87.4847	27.3779	19.6247	27.1212	28.3117	6.80595	17.4632	41.8003	178.537	4.57327	11.7592	34.7832
		100	26.5956	18.5818	26.8456	37.0238	39.1556	36.9396	55.0694	37.7867	27.9722	33.1715	67.6287	151.195	54.7328	17.014	57.8037	28.6269	61.04	5.49297	63.9659	18.1371	62.6127	74.581	43.121	20.4554	170.596	83.3849	307.767	16.5052	13.4641	38.8406	19.9474	50.1602	79.042	20.8274	14.2832	20.3774	21.5646	4.65574	12.7444	32.9836	165.792	2.90446	8.16793	26.5662
		500	13.0741	10.6329	14.0763	24.176	23.028	22.0132	38.721	23.1791	16.6299	18.6665	53.6753	132.658	40.6061	8.9523	40.057	15.9686	47.7177	2.13855	41.8251	10.5974	42.4178	55.0847	27.3929	9.88732	170.074	60.6673	288.28	8.23398	6.66644	24.6555	10.6953	34.6208	62.4485	11.0375	6.83051	10.4919	11.4612	1.92798	6.13285	19.0291	139.599	1.01221	3.50454	14.2092
		1000	9.62928	8.36061	10.6594	20.1219	18.3219	17.6141	33.2712	18.7797	13.2932	14.5721	48.5907	125.392	35.7068	6.78939	34.2044	12.419	42.9166	1.42454	34.8314	8.40804	35.8686	48.3454	22.5306	7.22938	169.85	52.9011	280.273	6.10296	4.92511	20.2727	8.17731	29.5113	56.4219	8.39664	4.97136	7.88303	8.72977	1.31887	4.47565	15.0154	129.634	0.642847	2.43425	10.8525
0.5	0.5	1	164.334	74.3484	137.924	101.529	144.853	131.595	122.202	123.915	100.324	139.231	106.114	178.055	104.166	86.5456	133.717	123.208	100.018	66.1537	174.738	68.36	154.541	143.767	127.94	132.65	139.399	167.81	300.601	97.7831	81.5051	115.484	96.1446	117.378	125.65	103.796	95.5023	110.292	106.586	46.9946	83.7002	128.916	219.655	48.0248	74.4885	128.948
		2	121.034	58.4601	104.444	84.5035	115.25	105.298	105.003	100.396	80.1943	108.692	96.0619	168.302	91.5982	65.6358	114.18	95.8207	89.9548	44.0668	145.52	54.237	130.68	126.178	105.23	96.9905	139.216	146.328	292.251	72.4761	60.2152	94.9549	73.5095	100.055	113.524	78.9613	69.5083	82.867	81.185	32.1475	61.0829	101.725	203.975	30.5003	51.7397	98.4856
		3	101.208	50.7905	88.766	75.9003	100.823	92.4235	96.087	88.7658	70.3476	94.0347	90.6292	162.847	84.9615	55.8322	104.103	82.7166	84.5443	34.7455	130.749	47.37	118.469	116.904	93.8639	80.7583	139.108	135.061	287.474	60.8289	50.4425	84.6825	62.8271	91.1323	106.981	67.2885	57.7198	70.1055	69.2338	25.7447	50.8034	88.5614	195.327	23.3868	41.8066	84.1218
		4	89.1433	45.9671	79.0913	70.3328	91.6965	84.2555	90.2242	81.3407	64.1035	84.8506	86.9621	159.084	80.5465	49.778	97.4977	74.521	80.904	29.3541	121.187	43.0318	110.504	110.741	86.5518	70.9172	139.032	127.596	284.133	53.7188	44.4865	78.0754	56.2032	85.2884	102.569	60.0688	50.5893	62.2616	61.8372	21.9911	44.5772	80.2686	189.415	19.3706	35.9384	75.2199
		5	80.785	42.5436	72.3193	66.2972	85.1901	78.4204	85.9241	76.0118	59.6445	78.3491	84.2201	156.225	77.2805	45.5378	92.664	68.7275	78.1887	25.7553	114.255	39.9424	104.696	106.185	81.2747	64.1175	138.973	122.092	281.568	48.7813	40.3554	73.3076	51.5502	81.0149	99.272	55.0067	45.671	56.787	56.6486	19.4608	40.2783	74.3747	184.952	16.7367	31.9601	68.969
		6	74.5409	39.9365	67.2189	63.1723	80.2183	73.9541	82.5633	71.918	56.2325	73.4087	82.044	153.928	74.7106	42.3429	88.893	64.3298	76.0379	23.1449	108.886	37.5835	100.178	102.602	77.2028	59.0487	138.925	117.771	279.489	45.0859	37.2665	69.629	48.0358	77.6826	96.6572	51.1889	42.0095	52.6733	52.7342	17.6111	37.0754	69.8818	181.384	14.8528	29.0388	64.2493
		7	69.6396	37.8573	63.1882	60.6455	76.2417	70.3769	79.8245	68.6293	53.5004	69.4754	80.2481	152.011	72.6045	39.8172	85.8247	60.8319	74.2656	21.1454	104.544	35.6981	96.5104	99.6669	73.9196	55.0769	138.884	114.237	277.744	42.1808	34.84	66.6632	45.2521	74.9723	94.5001	48.1685	39.1437	49.4286	49.6363	16.1851	34.567	66.2956	178.421	13.4265	26.7783	60.5117
		8	65.6553	36.1439	59.8926	58.5385	72.9568	67.4183	77.5256	65.9022	51.2413	66.239	78.7243	150.371	70.8282	37.7514	83.2525	57.956	72.7638	19.5535	100.924	34.1416	93.4422	97.1925	71.1887	51.8531	138.849	111.262	276.24	39.816	32.8662	64.1964	42.9714	72.7012	92.6706	45.6966	36.8198	46.7799	47.1003	15.0434	32.5317	63.3381	175.893	12.3021	24.9628	57.4503
		9	62.3304	34.6971	57.1287	56.7408	70.1769	64.9121	75.5528	63.5869	49.3279	63.5097	77.4041	148.938	69.2975	36.0184	81.0478	55.5323	71.4644	18.2492	97.8339	32.825	90.8169	95.0609	68.8637	49.1664	138.818	108.702	274.921	37.8404	31.2182	62.0964	41.0553	70.755	91.0862	43.6217	34.8848	44.5616	44.9712	14.1035	30.8361	60.8391	173.694	11.3888	23.4639	54.8787
		10	59.4992	33.452	54.7645	55.1796	67.7801	62.7493	73.8307	61.5848	47.6769	61.1636	76.242	147.668	67.9563	34.5357	79.1251	53.4503	70.3217	17.1563	95.1503	31.6904	88.5311	93.1938	66.8483	46.8813	138.79	106.462	273.746	36.1563	29.8142	60.2762	39.4138	69.0583	89.6919	41.8456	33.2401	42.6666	43.1483	13.3125	29.3944	58.6874	171.749	10.6294	22.1995	52.6761
		11	57.049	32.3642	52.7102	53.8043	65.6826	60.8549	72.3067	59.828	46.2311	59.1161	75.2058	146.529	66.7654	33.2471	77.4251	51.6342	69.3037	16.2241	92.7862	30.6978	86.5129	91.5364	65.076	44.9058	138.765	104.476	272.688	34.6976	28.5986	58.6756	37.9855	67.5586	88.449	40.3013	31.8193	41.0219	41.563	12.6353	28.1484	56.8066	170.009	9.98614	21.1145	50.7598
		12	54.9004	31.402	50.9021	52.5788	63.8244	59.1754	70.9429	58.268	44.9495	57.3068	74.2721	145.497	65.6965	32.1127	75.9051	50.0301	68.3873	15.4174	90.6793	29.8189	84.7106	90.0491	63.4991	43.1751	138.742	102.695	271.726	33.4173	27.5321	57.2515	36.7268	66.2178	87.3293	38.9413	30.5752	39.5758	40.1667	12.0472	27.057	55.1422	168.436	9.43295	20.1704	49.0713
		13	52.9953	30.5422	49.2937	51.476	62.1615	57.6715	69.711	56.8689	43.802	55.6914	73.4234	144.553	64.7282	31.1034	74.5332	48.5986	67.5549	14.7108	88.7834	29.0325	83.0859	88.7022	62.0823	41.6419	138.721	101.083	270.843	32.2814	26.5863	55.972	35.6058	65.008	86.3119	37.7308	29.4738	38.2905	38.9237	11.5304	26.0905	53.6542	167.002	8.95117	19.3392	47.5677
		14	51.2905	29.7672	47.8499	50.4756	60.6605	56.3131	68.5896	55.6034	42.7656	54.2363	72.6463	143.685	63.8445	30.1972	73.2851	47.3098	66.7933	14.0855	87.0635	28.323	81.6094	87.4732	60.7987	40.271	138.701	99.6134	270.029	31.2641	25.7395	54.8129	34.5984	63.9076	85.3805	36.6436	28.4895	37.1378	37.8071	11.0717	25.2264	52.3123	165.685	8.52708	18.6002	46.2167
		15	49.7527	29.0633	46.5438	49.5618	59.2957	55.0772	67.5618	54.4507	41.8229	52.9159	71.9303	142.882	63.0327	29.3773	72.1419	46.1406	66.092	13.5273	85.4922	27.678	80.2585	86.3443	59.6276	39.0353	138.683	98.2644	269.272	30.3458	24.9755	53.7554	33.6862	62.8999	84.5224	35.6596	27.6027	36.0959	36.7965	10.6611	24.4477	51.0933	164.468	8.15034	17.9376	44.9935
		16	48.356	28.4199	45.3543	48.722	58.0469	53.9458	66.6142	53.394	40.9598	51.7098	71.2668	142.135	62.2825	28.6305	71.0887	45.0731	65.4427	13.0251	84.048	27.088	79.015	85.3015	58.5525	37.9138	138.666	97.0191	268.567	29.5113	24.2813	52.7846	32.8547	61.9716	83.7275	34.7631	26.7981	35.1478	35.8755	10.2907	23.741	49.9787	163.337	7.81301	17.3392	43.8785
		17	47.0797	27.8286	44.2646	47.946	56.8977	52.9041	65.7363	52.4201	40.1653	50.6019	70.6492	141.436	61.5861	27.9463	70.1134	44.0929	64.8385	12.5704	82.7136	26.5452	77.8644	84.3334	57.5603	36.8896	138.65	95.8636	267.906	28.7483	23.6468	51.8887	32.0923	61.1121	82.9876	33.9415	26.0637	34.2798	35.0314	9.9546	23.0959	48.9538	162.283	7.50886	16.7952	42.8564
		18	45.9072	27.2823	43.2612	47.2258	55.8351	51.9404	64.9191	51.5181	39.4303	49.5791	70.0717	140.781	60.9365	27.3162	69.2061	43.1882	64.274	12.1563	81.475	26.0435	76.795	83.4307	56.6402	35.9494	138.635	94.7869	267.285	28.047	23.0638	51.0579	31.3897	60.3127	82.296	33.1847	25.3897	33.4811	34.2538	9.64774	22.5037	48.0068	161.295	7.23295	16.298	41.9145
		19	44.825	26.7754	42.3331	46.5544	54.8483	51.045	64.1555	50.6792	38.7475	48.6307	69.5299	140.163	60.3284	26.7333	68.3587	42.3496	63.7445	11.7771	80.3204	25.5776	75.797	82.5857	55.7834	35.082	138.62	93.7795	266.698	27.3994	22.5255	50.2843	30.7393	59.5661	81.6471	32.4843	24.7683	32.7427	33.5341	9.36619	21.9574	47.1279	160.366	6.9813	15.8413	41.0426
		20	43.822	26.3033	41.4709	45.9263	53.9282	50.2097	63.4394	49.896	38.1107	47.7477	69.0197	139.58	59.7571	26.1918	67.5643	41.569	63.2463	11.4283	79.2402	25.1433	74.8621	81.792	54.9826	34.2785	138.607	92.8336	266.143	26.7988	22.0265	49.5613	30.1347	58.8664	81.0362	31.8335	24.1928	32.0573	32.8653	9.10669	21.4515	46.3089	159.489	6.75066	15.4198	40.2322
		50	29.2492	19.1419	28.7153	36.0315	39.8626	37.3937	51.9127	37.7773	28.3448	34.4184	60.5115	129.564	50.4166	18.1717	54.8324	29.8154	54.9736	6.67936	62.2155	18.5165	59.9765	68.8319	42.4658	22.6605	138.365	77.4574	256.414	18.0374	14.7618	38.2626	21.1326	47.6643	70.8626	22.1761	15.896	21.9682	22.9325	5.51282	14.1452	33.8582	144.615	3.70435	9.52495	28.1744
		100	21.5424	15.0512	21.745	29.9893	31.716	29.9211	44.6062	30.6072	22.6575	26.8689	54.7793	122.468	44.3336	13.7814	46.821	23.1878	49.4424	4.4493	51.8124	14.6911	50.7163	60.4106	34.928	16.5689	138.183	67.5418	249.291	13.3692	10.9059	31.4609	16.1574	40.6298	64.024	16.8702	11.5694	16.5057	17.4673	3.77115	10.3229	26.7167	134.292	2.35261	6.61603	21.5186
		500	10.5901	8.61261	11.4018	19.5826	18.6527	17.8307	31.364	18.7751	13.4703	15.1199	43.477	107.453	32.8909	7.25136	32.4462	12.9345	38.6513	1.73222	33.8783	8.58392	34.3584	44.6186	22.1882	8.00873	137.76	49.1405	233.507	6.66952	5.39981	19.971	8.66318	28.0428	50.5833	8.94038	5.53271	8.49844	9.28354	1.56166	4.96761	15.4135	113.075	0.819888	2.83868	11.5095
		1000	7.79972	6.77209	8.63413	16.2987	14.8407	14.2675	26.9497	15.2116	10.7675	11.8034	39.3585	101.568	28.9225	5.4994	27.7056	10.0594	34.7624	1.15388	28.2135	6.81051	29.0536	39.1598	18.2498	5.8558	137.579	42.8499	227.021	4.9434	3.98934	16.4208	6.62362	23.9041	45.7018	6.80128	4.02681	6.38525	7.07111	1.06828	3.62528	12.1625	105.003	0.520706	1.97175	8.79052
